# Supplementary material for: Copper‐Catalyzed Asymmetric Silylation of Propargyl Dichlorides: Access to Enantioenriched Functionalized Allenylsilanes
Source: PubMed Central journal article supplement (PMC6899605; doi:10.1002/anie.201908343), 2019-10-04
Supplement: ANIE-58-16538-s001.pdf [file ANIE-58-16538-s001.pdf]

Supporting Information

**Copper-Catalyzed Asymmetric Silylation of Propargyl Dichlorides:  
Access to Enantioenriched Functionalized Allenylsilanes**

*Zheng-Li Liu<sup>+</sup>, Chao Yang<sup>+</sup>, Qi-Yan Xue, Meng Zhao, Cui-Cui Shan, Yun-He Xu,<sup>\*</sup> and Teck-Peng Loh*

anie\_201908343\_sm\_miscellaneous\_information.pdf

## Supporting Information

|                                                                                                                      |       |
|----------------------------------------------------------------------------------------------------------------------|-------|
| 1 General Information.....                                                                                           | S-2   |
| 2 General Procedures for the Preparation of Dichloropropargyl Substrates.....                                        | S-2   |
| 3 Optimization of the Reaction Conditions of Racemic Silyl-substituted Allenes.....                                  | S-10  |
| 4 General Procedures for the Synthesis of Racemic Silyl-substituted Allenes .....                                    | S-10  |
| 5 General Procedures for the Synthesis of Enantioenriched Silyl-substituted Allenes .....                            | S-23  |
| 6 General Procedures for the One-pot Synthesis of Enantioenriched Disilyl-substituted Allenes .....                  | S-30  |
| 7 Further Transformations of Silyl-substituted Chloroallenes.....                                                    | S-31  |
| 8 Gram-scaled Synthesis of Racemic Silyl-substituted Allenes.....                                                    | S-34  |
| 9 Determination of the Absolute Configuration of Compound ( <i>S</i> )- <b>3p</b> .....                              | S-35  |
| 10 References.....                                                                                                   | S-36  |
| 11 <sup>1</sup> H NMR, <sup>19</sup> F NMR, <sup>13</sup> C NMR and HPLC Spectra of the Substrates and Products..... | S-37  |
| 12 Crystal Data for ( <i>E, S</i> )- <b>14</b> .....                                                                 | S-108 |

## 1 General Information

Experiments involving air sensitive components were performed in glovebox. Et<sub>3</sub>N and DCE were fractionally distilled. Other reagents were commercially purchased and were used as received without further purification for the reactions. Proton nuclear magnetic resonance (<sup>1</sup>H NMR) and carbon nuclear magnetic resonance (<sup>13</sup>C NMR) spectra were performed on a Bruker Advance 400M NMR spectrometer (CDCl<sub>3</sub>). Chemical shifts <sup>1</sup>H NMR spectra are reported as δ in units of parts per million (ppm) downfield from SiMe<sub>4</sub> (δ 0.00 ppm) and relative to the signal of chloroform-*d* (δ 7.26 ppm, singlet). Multiplicities were given as: s (singlet); d (doublet); t (triplet); q (quartet); tt (triplet of triplets); td (triplet of doublets); m (multiplets) and *etc.* The number of protons (n) for a given resonance is indicated by nH. Coupling constants are reported as a *J* value in Hz. Carbon nuclear magnetic resonance spectra (<sup>13</sup>C NMR) are reported as in units of parts per million (ppm) downfield from SiMe<sub>4</sub> (0.00) and relative to the signal of chloroform-*d* (*J* = 77.03, triplet). High resolution mass spectral analysis (HRMS) were performed on Water XEVO G2 Q-TOF (Waters Corporation) and GCT Premier. The enantiomeric excesses were determined by HPLC analysis on Chiral Daicel Chiralpak OD-H, OJ, ID columns. Optical rotations were recorded on an Anton Paar MCP 200 polarimeter at 589 nm in dichloromethane.

## Experimental Procedure:

### 2 General Procedures for the Preparation of Dichloropropargyl Substrates (GP1) .

All substrates were prepared according to the reported literatures.<sup>1-3</sup>

#### The general procedure A<sup>1</sup>

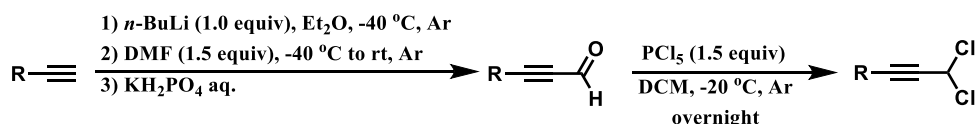

**Step 1:** To a solution of 1-alkyne (2.61 mL, 20 mmol) in dry Et<sub>2</sub>O (20 mL) at -40 °C was added dropwise 2.5 M *n*-BuLi (12.5 mL, 20 mmol) followed by the addition of anhydrous DMF (2.4 mL, 30 mmol) in one portion. The clear reaction mixture was allowed to warm up to room temperature and stirred until full conversion (TLC monitoring). The solution was then poured into a biphasic mixture of 100 mL 10% KH<sub>2</sub>PO<sub>4</sub> aqueous solution and ether (80 mL) at 0 °C. The mixture was stirred vigorously, and layers were partitioned. The aqueous layer was extracted with ether (3 x 50 mL). The organic layers were collected, combined, dried over Na<sub>2</sub>SO<sub>4</sub>, filtered and concentrated *in vacuo*. The crude product obtained was used in the following chloration step without further purification.

**Step 2:** The crude product was dissolved in dry CH<sub>2</sub>Cl<sub>2</sub> (40 mL) and cooled to -20 °C. Then, PCl<sub>5</sub> (6.2 g, 30 mmol) was added portion wise and the reaction mixture was stirred overnight. It was quenched by the addition of saturated NaHCO<sub>3</sub> solution at -20 °C. The mixture allowed to warm back to 25 °C, water was added to completely neutralize the solution. The aqueous phase was extracted by CH<sub>2</sub>Cl<sub>2</sub> (3 x 50 mL), the organic phases were collected, dried over Na<sub>2</sub>SO<sub>4</sub>, concentrated under reduced pressure. Purification by column chromatography on

silica gel (eluent: petroleum ether) provided the desired compound.

### The general procedure B <sup>2</sup>

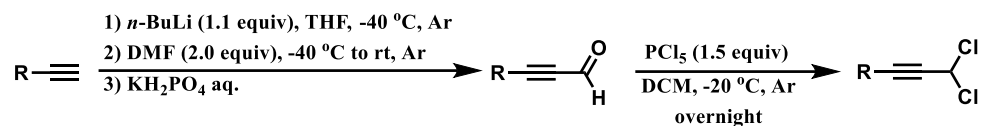

**Step 1:** A dried, argon-flushed flask equipped with a magnetic stirring bar was charged with dry THF (40 mL) and ethynylcyclohexane (4.33 g, 40 mmol). The solution was cooled to  $-40\text{ }^\circ\text{C}$  and *n*-BuLi (17.6 mL, 44 mmol, 2.5 M in hexane) was added dropwise. The reaction mixture was stirred for 1 hour at  $-40\text{ }^\circ\text{C}$  followed by the addition of dry DMF (5.85 g, 80.0 mmol). Then, the reaction mixture was allowed to warm up to room temperature until the starting material was completely consumed (monitored by TLC). The solution was then poured into a biphasic mixture of 200 mL 10%  $\text{KH}_2\text{PO}_4$  aqueous solution and ether (160 mL) at  $0\text{ }^\circ\text{C}$ . The mixture was stirred vigorously, and layers were partitioned. The aqueous layer was extracted with ether (3 x 50 mL). The organic layers were collected, combined, dried over  $\text{Na}_2\text{SO}_4$ , filtered and concentrated *in vacuo*. The residue was purified by column chromatography (eluent: PE/EA = 95:5) to afford the product (3.37 g) as colorless oil.

**Step 2:** The above product was dissolved in dry  $\text{CH}_2\text{Cl}_2$  (40 mL) and cooled to  $-20\text{ }^\circ\text{C}$ . Then,  $\text{PCl}_5$  (12.5 g, 60 mmol) was added portion wise and the reaction mixture was stirred overnight. It was quenched by the addition of saturated  $\text{NaHCO}_3$  solution at  $-20\text{ }^\circ\text{C}$ . The mixture allowed to warm back to room temperature, water was added to completely neutralize the solution. The aqueous phase was extracted by  $\text{CH}_2\text{Cl}_2$  (3 x 50 mL), the organic phases were collected, dried over  $\text{Na}_2\text{SO}_4$ , concentrated under reduced pressure. Purification by column chromatography on silica gel (eluent: PE) provided the desired compound (4.05 g) as slightly yellow oil. (85% yield over two steps)

### The general procedure C <sup>1,3</sup>

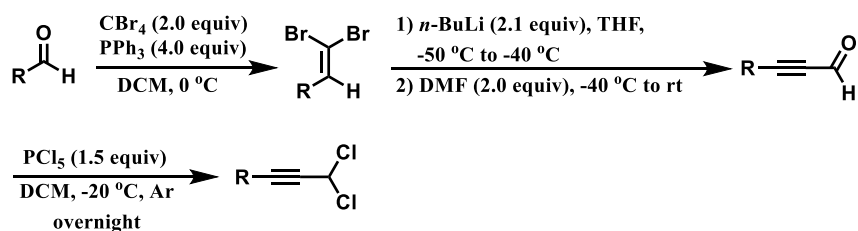

**Step 1:** Under argon atmosphere, a solution of triphenylphosphine (4.0 equiv) and tetrabromomethane (2.0 equiv) in DCM (0.15 M) was stirred at  $0\text{ }^\circ\text{C}$  for 30 minutes. Then the corresponding aldehyde was added over a period of five minutes, and the mixture was stirred at  $0\text{ }^\circ\text{C}$  for one hour. After addition of water, the layers were separated, and the aqueous layer was extracted with DCM (3 x 50 mL). The combined organic layers were dried over  $\text{Na}_2\text{SO}_4$  and the solvent was removed under reduced pressure. The crude product was dry-loaded on silica and subjected to flash chromatography (silica, DCM/PE).

**Step 2:** Under argon atmosphere, *n*-BuLi (2.1 equiv, 2.5 M in hexane) was added over a

period of 30 minutes via syringe pump to a solution of *gem*-dibromoolefine (1.0 equiv) in dry THF (0.4 M) at -50 °C, and the mixture was stirred at -40 °C for 15 minutes. After addition of dry DMF (2.0 equiv) at once, the mixture was allowed to warm to room temperature and stirred for one hour. The mixture was added to a stirring solution of aqueous NaH<sub>2</sub>PO<sub>4</sub>/Et<sub>2</sub>O (1:1). After five minutes, the layers were separated and the aqueous layer was extracted with Et<sub>2</sub>O (3 x 50 mL). The combined organic layers were dried over Na<sub>2</sub>SO<sub>4</sub>, the solvent was removed under reduced pressure and the crude product was subjected to flash chromatography (silica, EA/PE).

**Step 3:** The crude product was dissolved in dry CH<sub>2</sub>Cl<sub>2</sub> (1.0 M) and cooled to -20 °C. Then, PCl<sub>5</sub> (1.5 equiv) was added portion wise and the reaction mixture was stirred overnight. It was quenched by the addition of saturated NaHCO<sub>3</sub> solution at -20 °C. The mixture allowed to warm back to 25 °C, water was added to completely neutralize the solution. The aqueous phase was extracted by CH<sub>2</sub>Cl<sub>2</sub> (3 x 50 mL); the organic phases were collected, dried over Na<sub>2</sub>SO<sub>4</sub>, concentrated under reduced pressure. Purification by column chromatography on silica gel (eluent: PE) provided the desired compound.

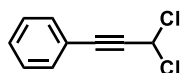

1a

Prepared according to the general procedure **B** using corresponding aldehyde (2.60 g, 20 mmol). The product **1a** was isolated in 84% yield (3.11 g) by column chromatography as yellow oil.

**Eluent:** petroleum ether. **<sup>1</sup>H NMR (400 MHz, CDCl<sub>3</sub>):** δ 7.50 – 7.48 (m, 2H), 7.42 – 7.33 (m, 3H), 6.49 (s, 1H). **<sup>13</sup>C NMR (100 MHz, CDCl<sub>3</sub>):** δ 132.08, 129.94, 128.59, 120.69, 90.03, 84.17, 56.12. **HRMS (EI):** m/z calculated for C<sub>9</sub>H<sub>6</sub>Cl<sub>2</sub> [M]<sup>+</sup>: 183.9841, found: 183.9840. **IR (KBr):** 2225, 1491, 1444, 1279, 1236, 757, 722, 687.

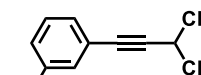

1b

Prepared according to the general procedure **B** using corresponding aldehyde (2.88 g, 20 mmol). The product **1b** was isolated in 67% yield (2.67 g) by column chromatography as yellow oil.

**Eluent:** petroleum ether. **<sup>1</sup>H NMR (400 MHz, CDCl<sub>3</sub>):** δ 7.32 – 7.28 (m, 2H), 7.26 – 7.24 (m, 1H), 7.22 – 7.19 (m, 1H), 6.49 (s, 1H), 2.34 (s, 3H). **<sup>13</sup>C NMR (100 MHz, CDCl<sub>3</sub>):** δ 138.24, 132.47, 130.69, 129.01, 128.34, 120.38, 90.18, 83.72, 56.03, 21.15. **HRMS (EI):** m/z calculated for C<sub>10</sub>H<sub>8</sub>Cl<sub>2</sub> [M]<sup>+</sup>: 197.9998, found: 198.0010. **IR (KBr):** 2233, 1485, 1293, 1243, 1035, 785, 723, 688.

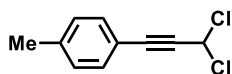

1c

Prepared according to the general procedure **B** using corresponding aldehyde (1.44 g, 10 mmol). The product **1c** was isolated in 71% yield (1.42 g) by column chromatography as yellow solid.

**Eluent:** petroleum ether. **<sup>1</sup>H NMR (400 MHz, CDCl<sub>3</sub>):** δ 7.38 (d, *J* = 8.1 Hz, 2H), 7.16 (d, *J* = 7.9 Hz, 2H), 6.49 (s, 1H), 2.37 (s, 3H). **<sup>13</sup>C NMR (100 MHz, CDCl<sub>3</sub>):** δ 140.21, 131.86,

129.22, 117.50, 90.28, 83.52, 56.14, 21.60. **HRMS (EI):**  $m/z$  calculated for  $C_{10}H_8Cl_2 [M]^+$ : 197.9998, found: 197.9997. **IR (KBr):** 2224, 1509, 1282, 1232, 1197, 1023, 1007, 823, 723, 692.

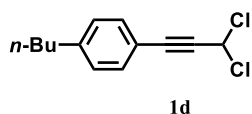

Prepared according to the general procedure **B** using corresponding aldehyde (2.05 g, 11 mmol). The product **1d** was isolated in 87% yield (2.31 g) by column chromatography as yellow oil. **Eluent:** petroleum ether.  **$^1H$  NMR (400 MHz,  $CDCl_3$ ):**  $\delta$  7.41 – 7.39 (m, 2H), 7.17 – 7.15 (m, 2H), 6.49 (s, 1H), 2.62 (t,  $J = 7.6$  Hz, 2H), 1.62 – 1.55 (m, 2H), 1.39 – 1.29 (m, 2H), 0.92 (t,  $J = 7.4$  Hz, 3H).  **$^{13}C$  NMR (100 MHz,  $CDCl_3$ ):**  $\delta$  145.19, 131.88, 128.58, 117.69, 90.35, 83.54, 56.15, 35.64, 33.26, 22.26, 13.88. **HRMS (EI):**  $m/z$  calculated for  $C_{13}H_{14}Cl_2 [M]^+$ : 240.0467, found: 240.0484. **IR (KBr):** 2225, 1510, 1283, 1237, 1195, 1023, 1005, 835, 723, 696.

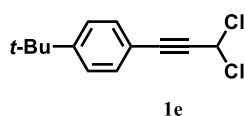

Prepared according to the general procedure **B** using corresponding aldehyde (2.79 g, 15 mmol). The product **1e** was isolated in 72% yield (2.60 g) by column chromatography as yellow solid. **Eluent:** petroleum ether.  **$^1H$  NMR (400 MHz,  $CDCl_3$ ):**  $\delta$  7.43 – 7.41 (m, 2H), 7.38 – 7.36 (m, 2H), 6.49 (s, 1H), 1.31 (s, 9H).  **$^{13}C$  NMR (100 MHz,  $CDCl_3$ ):**  $\delta$  153.32, 131.73, 125.49, 117.53, 90.28, 83.55, 56.16, 34.94, 31.10. **HRMS (EI):**  $m/z$  calculated for  $C_{13}H_{14}Cl_2 [M]^+$ : 240.0467, found: 240.0475. **IR (KBr):** 2226, 1505, 1464, 1271, 1239, 1195, 1021, 1005, 835, 724, 688.

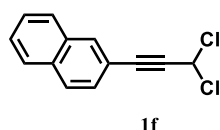

Prepared according to the general procedure **C** using corresponding aldehyde (1.62 g, 9 mmol). The product **1f** was isolated in 45% yield (0.95 g) by column chromatography as yellow solid. **Eluent:** petroleum ether.  **$^1H$  NMR (400 MHz,  $CDCl_3$ ):**  $\delta$  8.04 (s, 1H), 7.85 – 7.81 (m, 3H), 7.56 – 7.49 (m, 3H), 6.55 (s, 1H).  **$^{13}C$  NMR (100 MHz,  $CDCl_3$ ):**  $\delta$  133.45, 132.68, 132.64, 128.26, 128.01, 127.85, 127.49, 126.88, 117.79, 90.30, 84.21, 56.05. **HRMS (EI):**  $m/z$  calculated for  $C_{13}H_8Cl_2 [M]^+$ : 233.9998, found: 234.0007. **IR (KBr):** 2222, 1498, 1280, 1266, 1242, 1196, 1025, 1014, 828, 750, 715, 687.

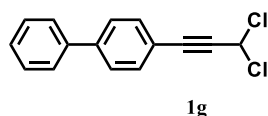

Prepared according to the general procedure **B** using corresponding aldehyde (2.47 g, 12 mmol). The product **1g** was isolated in 52% yield (1.63 g) by column chromatography as yellow solid. **Eluent:** dichloromethane /petroleum ether = 20:80.  **$^1H$  NMR (400 MHz,  $CDCl_3$ ):**  $\delta$  7.61 – 7.55

(m, 6H), 7.48 – 7.44 (m, 2H), 7.40 – 7.36 (m, 1H), 6.52 (s, 1H). **<sup>13</sup>C NMR (100 MHz, CDCl<sub>3</sub>):** δ 142.60, 139.96, 132.41, 128.94, 127.99, 127.13, 127.10, 119.37, 89.87, 84.61, 56.03 ppm; **HRMS (EI):** m/z calculated for C<sub>15</sub>H<sub>10</sub>Cl<sub>2</sub> [M]<sup>+</sup>: 260.0154, found: 260.0162. **IR (KBr):** 2222, 1497, 1288, 1232, 1197, 1027, 1002, 840, 766, 718, 689.

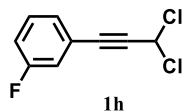

Prepared according to the general procedure **B** using corresponding aldehyde (1.48 g, 10 mmol). The product **1h** was isolated in 43% yield (0.87 g) by column chromatography as yellow oil. **Eluent:** petroleum ether. **<sup>1</sup>H NMR (400 MHz, CDCl<sub>3</sub>):** δ 7.36 – 7.26 (m, 2H), 7.21 – 7.18 (m, 1H), 7.14 – 7.09 (m, 1H), 6.47 (s, 1H). **<sup>19</sup>F NMR (376 MHz, CDCl<sub>3</sub>):** δ -112.11. **<sup>13</sup>C NMR (100 MHz, CDCl<sub>3</sub>):** δ 162.26 (d, *J* = 246.2 Hz), 130.17 (d, *J* = 8.5 Hz), 127.88 (d, *J* = 3.2 Hz), 122.4 (d, *J* = 9.4 Hz), 118.80 (d, *J* = 23.2 Hz), 117.26 (d, *J* = 21.0 Hz), 88.30 (d, *J* = 3.4 Hz), 84.71, 55.60. **HRMS (EI):** m/z calculated for C<sub>9</sub>H<sub>5</sub>Cl<sub>2</sub>F[M]<sup>+</sup>: 201.9747, found: 201.9749. **IR (KBr):** 2237, 1609, 1583, 1487, 1296, 1244, 1176, 1154, 1024, 875, 786, 723, 679.

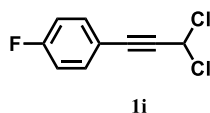

Prepared according to the general procedure **B** using corresponding aldehyde (1.4 g, 9.4 mmol). The product **1i** was isolated in 78% yield (1.50 g) by column chromatography as yellow oil. **Eluent:** petroleum ether. **<sup>1</sup>H NMR (400 MHz, CDCl<sub>3</sub>):** δ 7.50 – 7.45 (m, 2H), 7.08 – 7.02 (m, 2H), 6.47 (s, 1H). **<sup>19</sup>F NMR (376 MHz, CDCl<sub>3</sub>):** δ -112.77. **<sup>13</sup>C NMR (100 MHz, CDCl<sub>3</sub>):** δ 163.40 (d, *J* = 250.5 Hz), 134.07 (d, *J* = 8.6 Hz), 116.70 (d, *J* = 3.6 Hz), 115.91 (d, *J* = 22.17 Hz), 88.83, 83.85, 55.85. **HRMS (EI):** m/z calculated for C<sub>9</sub>H<sub>5</sub>Cl<sub>2</sub>F[M]<sup>+</sup>: 201.9747, found: 201.9757. **IR (KBr):** 2229, 1601, 1479, 1283, 1237, 1157, 1014, 836, 726, 696.

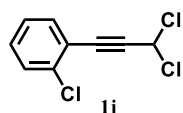

Prepared according to the general procedure **B** using corresponding aldehyde (0.5 g, 3.0 mmol). The product **1j** was isolated in 50% yield (0.33 g) by column chromatography as yellow oil. **Eluent:** petroleum ether. **<sup>1</sup>H NMR (400 MHz, CDCl<sub>3</sub>):** δ 7.52 (dd, *J*<sub>1</sub> = 7.6 Hz, *J*<sub>2</sub> = 1.7 Hz, 1H), 7.44 – 7.41 (m, 1H), 7.33 (td, *J*<sub>1</sub> = 7.6 Hz, *J*<sub>2</sub> = 1.7 Hz, 1H), 7.25 (td, *J*<sub>1</sub> = 7.2 Hz, *J*<sub>2</sub> = 1.3 Hz, 1H), 6.53 (s, 1H). **<sup>13</sup>C NMR (100 MHz, CDCl<sub>3</sub>):** δ 136.52, 133.72, 130.87, 129.49, 126.58, 120.72, 88.57, 86.45, 55.69. **HRMS (EI):** m/z calculated for C<sub>9</sub>H<sub>5</sub>Cl<sub>3</sub>[M]<sup>+</sup>: 217.9451, found: 217.9462. **IR (KBr):** 2230, 1474, 1435, 1293, 1250, 1068, 1035, 1003, 756, 727, 690.

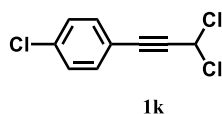

Prepared according to the general procedure **B** using corresponding aldehyde (3.46 g, 21.0 mmol). The product **1k** was isolated in 88% yield (4.06 g) by column chromatography as yellow solid.

**Eluent:** petroleum ether. **<sup>1</sup>H NMR (400 MHz, CDCl<sub>3</sub>):** δ 7.44 – 7.41 (m, 2H), 7.36 – 7.32 (m, 2H), 6.47 (s, 1H). **<sup>13</sup>C NMR (100 MHz, CDCl<sub>3</sub>):** δ 136.11, 133.18, 128.90, 119.05, 88.62, 84.87, 55.73. **HRMS (EI):** m/z calculated for C<sub>9</sub>H<sub>5</sub>Cl<sub>3</sub>[M]<sup>+</sup>: 217.9451, found: 217.9461. **IR** (KBr): 2225, 1491, 1279, 1232, 1090, 1004, 830, 761, 717, 687.

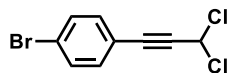

**1l**

Prepared according to the general procedure **B** using corresponding aldehyde (2.47 g, 11.8 mmol). The product **1l** was isolated in 80% yield (2.50 g) by column chromatography as white solid.

**Eluent:** petroleum ether. **<sup>1</sup>H NMR (400 MHz, CDCl<sub>3</sub>):** δ 7.52 – 7.49 (m, 2H), 7.37 – 7.34 (m, 2H), 6.47 (s, 1H). **<sup>13</sup>C NMR (100 MHz, CDCl<sub>3</sub>):** δ 133.32, 131.83, 124.41, 119.52, 88.67, 85.02, 55.71. **HRMS (EI):** m/z calculated for C<sub>9</sub>H<sub>5</sub>Cl<sub>2</sub>Br[M]<sup>+</sup>: 261.8946, found: 261.8950. **IR** (KBr): 2224, 1582, 1487, 1278, 1239, 1207, 1069, 1011, 826, 749, 718, 686.

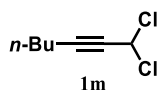

**1m**

Prepared according to the general procedure **A** using corresponding aldehyde (2.97 g, 27.0 mmol). The product **1m** was isolated in 66% yield (2.94 g) by column chromatography as colorless oil.

**Eluent:** petroleum ether (b.p. = 30 – 60 °C). **<sup>1</sup>H NMR (400 MHz, CDCl<sub>3</sub>):** δ 6.26 (t, *J* = 2.0 Hz, 1H), 2.32 (td, *J*<sub>1</sub> = 7.0 Hz, *J*<sub>2</sub> = 2.0 Hz, 2H), 1.57 – 1.50 (m, 2H), 1.46 – 1.37 (m, 2H), 0.92 (t, *J* = 7.3 Hz, 3H). **<sup>13</sup>C NMR (100 MHz, CDCl<sub>3</sub>):** δ 92.42, 76.32, 56.05, 29.87, 21.90, 18.55, 13.51. **HRMS (EI):** m/z calculated for C<sub>7</sub>H<sub>10</sub>Cl<sub>2</sub> [M]<sup>+</sup>: 164.0154, found: 164.0151. **IR** (KBr): 2959, 2928, 2858, 2239, 1465, 1379, 1254, 1197, 1159, 815, 725, 685.

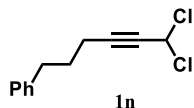

**1n**

Prepared according to the general procedure **B** using corresponding aldehyde (1.1 g, 6.4 mmol). The product **1n** was isolated in 45% yield (0.66 g) by column chromatography as colorless oil.

**Eluent:** petroleum ether (b.p. = 30 – 60 °C). **<sup>1</sup>H NMR (400 MHz, CDCl<sub>3</sub>):** δ 7.31 – 7.27 (m, 2H), 7.22 – 7.18 (m, 3H), 6.27 (t, *J* = 2.0 Hz, 1H), 2.72 (t, *J* = 7.4 Hz, 2H), 2.32 (td, *J*<sub>1</sub> = 7.1 Hz, *J*<sub>2</sub> = 2.0 Hz, 2H), 1.88 (q, *J* = 7.0 Hz, 2H). **<sup>13</sup>C NMR (100 MHz, CDCl<sub>3</sub>):** δ 141.03, 128.53, 128.46, 126.10, 91.90, 76.92, 55.98, 34.64, 29.38, 18.20. **HRMS (EI):** m/z calculated for C<sub>12</sub>H<sub>12</sub>Cl<sub>2</sub> [M]<sup>+</sup>: 226.0311, found: 226.0321. **IR** (KBr): 3027, 2945, 2861, 2238, 1496, 1455, 1426, 1255, 1198, 1158, 862, 722, 699.

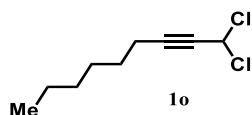

**1o**

Prepared according to the general procedure **A** using corresponding aldehyde (1.34 g, 9.7 mmol). The product **1o** was isolated in 68% yield (1.28 g) by column chromatography as colorless oil.

**Eluent:** petroleum ether (b.p. = 30 – 60 °C). **<sup>1</sup>H NMR (400 MHz, CDCl<sub>3</sub>):** δ 6.27 (t, *J* = 4.0 Hz, 1H), 2.31 (td, *J*<sub>1</sub> = 7.1 Hz, *J*<sub>2</sub> = 2.0 Hz, 2H), 1.58 – 1.51 (m, 2H), 1.42 – 1.34 (m, 2H),



1.33 – 1.26 (m, 4H), 0.90 (t,  $J = 6.7$  Hz, 3H).  $^{13}\text{C}$  NMR (100 MHz,  $\text{CDCl}_3$ ):  $\delta$  92.51, 76.34, 56.05, 31.20, 28.45, 27.79, 22.47, 18.85, 13.99. HRMS (EI):  $m/z$  calculated for  $\text{C}_7\text{H}_9\text{Cl}_2$   $[\text{M}-\text{C}_2\text{H}_5]^+$ : 163.0076, found: 163.0087. IR (KBr): 2956, 2930, 2860, 2322, 2238, 1752, 1690, 1466, 1458, 1428, 1380, 1328, 1252, 1198, 1158, 1030, 958, 814, 780, 718, 684.

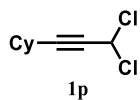

Prepared according to the general procedure **B** using corresponding aldehyde (3.4 g, 25.0 mmol). The product **1p** was isolated in 85% yield (4.06 g) by column chromatography as pale yellow oil. **Eluent**: petroleum ether.  $^1\text{H}$  NMR (400 MHz,  $\text{CDCl}_3$ ):  $\delta$  6.28 (d,  $J = 1.8$  Hz, 1H), 2.54 – 2.49 (m, 1H), 1.83 – 1.78 (m, 2H), 1.73 – 1.66 (m, 2H), 1.52 – 1.44 (m, 3H), 1.36 – 1.30 (m, 3H).  $^{13}\text{C}$  NMR (100 MHz,  $\text{CDCl}_3$ ):  $\delta$  96.00, 76.53, 56.13, 31.73, 29.03, 25.68, 24.60. HRMS (EI):  $m/z$  calculated for  $\text{C}_9\text{H}_{12}\text{Cl}_2$   $[\text{M}]^+$ : 190.0311, found: 190.0306. IR (KBr): 2934, 2856, 2234, 1449, 1252, 1197, 1165, 888, 864, 722, 688.

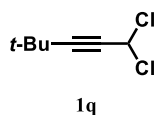

Prepared according to the general procedure **B** using corresponding aldehyde (2.3 g, 20.9 mmol). The product **1q** was isolated in 34% yield (1.18 g) by column chromatography as colorless oil. **Eluent**: petroleum ether (b.p. = 30 – 60 °C).  $^1\text{H}$  NMR (400 MHz,  $\text{CDCl}_3$ ):  $\delta$  6.26 (s, 1H), 1.25 (s, 9H).  $^{13}\text{C}$  NMR (100 MHz,  $\text{CDCl}_3$ ):  $\delta$  99.66, 75.18, 56.10, 30.20, 27.65. HRMS (EI):  $m/z$  calculated for  $\text{C}_6\text{H}_7\text{Cl}_2$   $[\text{M}-\text{CH}_3]^+$ : 148.9919, found: 148.9918. IR (KBr): 2973, 2931, 1701, 1368, 1270, 1210, 841, 819, 728, 698.

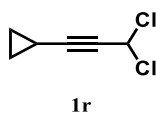

Prepared according to the general procedure **A** using corresponding aldehyde (0.33 g, 3.5 mmol). The product **1r** was isolated in 55% yield (0.29 g) by column chromatography as colorless oil. **Eluent**: petroleum ether (b.p. = 30 – 60 °C).  $^1\text{H}$  NMR (400 MHz,  $\text{CDCl}_3$ ):  $\delta$  6.24 (d,  $J = 1.7$  Hz, 1H), 1.40 – 1.33 (m, 1H), 0.91 – 0.85 (m, 2H), 0.83 – 0.78 (m, 2H).  $^{13}\text{C}$  NMR (100 MHz,  $\text{CDCl}_3$ ):  $\delta$  95.76, 71.66, 56.58, 9.13, 0.00. HRMS (EI):  $m/z$  calculated for  $\text{C}_6\text{H}_6\text{Cl}_2$   $[\text{M}]^+$ : 147.9841, found: 147.9843. IR (KBr): 2238, 1428, 1361, 1257, 1196, 1165, 1056, 1032, 889, 814, 794, 720, 678.

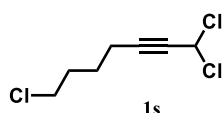

Prepared according to the general procedure **B** using corresponding aldehyde (2.23 g, 15.4 mmol). The product **1s** was isolated in 52% yield (1.60 g) by column chromatography as colorless oil. **Eluent**: petroleum ether.  $^1\text{H}$  NMR (400 MHz,  $\text{CDCl}_3$ ):  $\delta$  6.26 (t,  $J = 2.0$  Hz, 1H), 3.58 (t,  $J = 6.4$  Hz, 2H), 2.39 (td,  $J_1 = 7.0$  Hz,  $J_2 = 1.9$  Hz, 2H), 1.93 – 1.86 (m, 2H), 1.76 – 1.69 (m, 2H).

**<sup>13</sup>C NMR (100 MHz, CDCl<sub>3</sub>):** δ 91.26, 76.94, 55.83, 44.29, 31.39, 25.03, 18.19. **HRMS (EI):** m/z calculated for C<sub>7</sub>H<sub>9</sub>Cl<sub>2</sub> [M-Cl]<sup>+</sup>: 163.0076, found: 163.0076. **IR (KBr):** 2957, 2869, 2323, 2239, 1455, 1431, 1255, 1198, 1160, 976, 812, 723, 684.

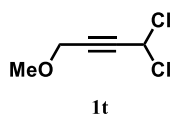

Prepared according to the general procedure **A** using corresponding aldehyde (3.2 g, 32.6 mmol). The product **1t** was isolated in 37% yield (1.87 g) by column chromatography as pale yellow oil. **Eluent:** petroleum ether (b.p. = 30 – 60 °C) /diethyl ether = 90:10. **<sup>1</sup>H NMR (400 MHz, CDCl<sub>3</sub>):** δ 6.30 (t, *J* = 1.7 Hz, 1H), 4.22 (d, *J* = 1.7 Hz, 2H), 3.41 (s, 3H). **<sup>13</sup>C NMR (100 MHz, CDCl<sub>3</sub>):** δ 86.29, 81.61, 59.56, 58.00, 55.05. **HRMS (EI):** m/z calculated for C<sub>5</sub>H<sub>5</sub>Cl<sub>2</sub>O [M-H]<sup>+</sup>: 150.9712, found: 150.9713. **IR (KBr):** 2238, 1718, 1340, 1308, 1254, 1198, 1148, 1094, 993, 810, 737, 697.

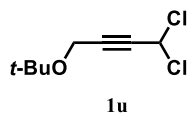

Prepared according to the general procedure **A** using corresponding aldehyde (1.95 g, 13.9 mmol). The product **1u** was isolated in 84% yield (2.27 g) by column chromatography as pale yellow oil. **Eluent:** ethyl acetate /petroleum ether = 2:98. **<sup>1</sup>H NMR (400 MHz, CDCl<sub>3</sub>):** δ 6.29 (t, *J* = 1.7 Hz, 1H), 4.20 (d, *J* = 1.6 Hz, 2H), 1.25 (s, 9H). **<sup>13</sup>C NMR (100 MHz, CDCl<sub>3</sub>):** δ 88.56, 79.90, 74.96, 55.39, 50.39, 27.45. **HRMS (EI):** m/z calculated for C<sub>7</sub>H<sub>9</sub>Cl<sub>2</sub>O[M-CH<sub>3</sub>]<sup>+</sup>: 179.0025, found: 179.0026. **IR (KBr):** 2978, 2230, 1602, 1472, 1393, 1368, 1253, 1191, 1148, 1067, 887, 843, 730.

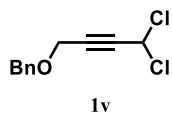

Prepared according to the general procedure **B** using corresponding aldehyde (2.24 g, 12.9 mmol). The product **1v** was isolated in 56% yield (1.64 g) by column chromatography as yellow oil. **Eluent:** diethyl ether /petroleum ether = 2:98. **<sup>1</sup>H NMR (400 MHz, CDCl<sub>3</sub>):** δ 7.39 – 7.30 (m, 5H), 6.30 (t, *J* = 1.7 Hz, 1H), 4.61 (s, 2H), 4.28 (d, *J* = 1.7 Hz, 2H). **<sup>13</sup>C NMR (100 MHz, CDCl<sub>3</sub>):** δ 136.87, 128.54, 128.18, 128.11, 86.46, 81.69, 72.04, 56.96, 55.09. **HRMS (EI):** m/z calculated for C<sub>11</sub>H<sub>9</sub>Cl<sub>2</sub>O[M-H]<sup>+</sup>: 227.0025, found: 227.0029. **IR (KBr):** 3032, 2982, 2859, 2229, 1496, 1455, 1354, 1253, 1199, 1161, 1144, 1074, 1028, 940, 807, 730, 698.

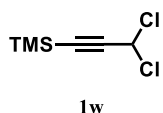

Prepared according to the general procedure **A** using corresponding aldehyde (1.4 g, 11.1 mmol). The product **1w** was isolated in 50% yield (1.00 g) by column chromatography as colorless oil. **Eluent:** ethyl acetate /petroleum ether (b.p. = 30 – 60 °C) = 1:99. **<sup>1</sup>H NMR (400 MHz, CDCl<sub>3</sub>):** δ 6.22 (s, 1H), 0.22 (s, 9H). **<sup>13</sup>C NMR (100 MHz, CDCl<sub>3</sub>):** δ 99.44, 96.75, 55.69, 0.00. **HRMS (EI):** m/z calculated for C<sub>5</sub>H<sub>7</sub>Cl<sub>2</sub>Si [M-CH<sub>3</sub>]<sup>+</sup>: 164.9689, found: 164.9691. **IR (KBr):**

2925, 2854, 2228, 1911, 1458, 1376, 1252, 1114, 846, 731, 699.

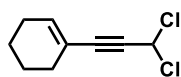

**1x**

Prepared according to the general procedure **B** using corresponding aldehyde (1.61 g, 12.0 mmol). The product **1x** was isolated in 84% yield (1.91 g) by column chromatography as yellow oil. **Eluent:** petroleum ether (b.p. = 30 – 60 °C). **<sup>1</sup>H NMR (400 MHz, CDCl<sub>3</sub>):** δ 6.39 (s, 1H), 6.27 (p, *J* = 1.9 Hz, 1H), 2.15 – 2.11 (m, 4H), 1.68 – 1.56 (m, 4H). **<sup>13</sup>C NMR (100 MHz, CDCl<sub>3</sub>):** δ 138.81, 118.91, 92.01, 81.79, 56.35, 28.33, 25.74, 21.99, 21.22. **HRMS (EI):** *m/z* calculated for C<sub>9</sub>H<sub>10</sub>Cl<sub>2</sub>[M]<sup>+</sup>: 188.0154, found: 188.0150. **IR (KBr):** 2936, 2861, 2222, 1628, 1449, 1435, 1274, 1224, 1195, 1137, 1078, 1049, 1005, 931, 919, 848, 799, 729, 685.

### 3 Optimization of the Reaction Conditions of Racemic Silyl-substituted Allenes.

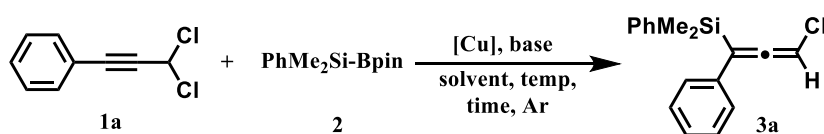

| entry | cat. (mol%) | base (equiv)            | solvent (mL)   | temp (°C) | time (h) | yield (%)       |
|-------|-------------|-------------------------|----------------|-----------|----------|-----------------|
| 1     | CuTc (10)   | NaOMe (4.0)             | DCE            | -30       | 36       | 0               |
| 2     | CuTc (10)   | NaOMe (2.0)             | DCE            | -30       | 36       | 54              |
| 3     | CuTc (10)   | NaOMe (2.0)             | DCE            | -10       | 36       | 60              |
| 4     | CuTc (10)   | NaOMe (2.0)             | DCE            | rt        | 36       | 6               |
| 5     | CuTc (10)   | NaOMe (2.0)             | MeOH           | -10       | 36       | 62              |
| 6     | CuTc (10)   | Et <sub>3</sub> N (2.0) | MeOH           | -10       | 45       | 72              |
| 7     | CuTc (10)   | Et <sub>3</sub> N (2.0) | DCE/MeOH= 2:1  | -10       | 45       | 76              |
| 8     | CuTc (10)   | Et <sub>3</sub> N (2.0) | <i>i</i> -PrOH | -10       | 24       | 23              |
| 9     | CuTc (10)   | Et <sub>3</sub> N (2.0) | <i>t</i> -AmOH | -10       | 24       | 10              |
| 10    | CuCl (10)   | Et <sub>3</sub> N (2.0) | DCE/MeOH= 2:1  | -10       | 20       | 76              |
| 11    | CuBr (10)   | Et <sub>3</sub> N (2.0) | DCE/MeOH= 2:1  | -10       | 20       | 76              |
| 12    | CuCN (10)   | Et <sub>3</sub> N (2.0) | DCE/MeOH= 2:1  | -10       | 20       | 63              |
| 13    | CuI (5)     | Et <sub>3</sub> N (2.0) | DCE/MeOH= 2:1  | -10       | 2        | 79 <sup>c</sup> |
| 14    | --          | Et <sub>3</sub> N (2.0) | DCE/MeOH= 2:1  | -10       | 2        | --              |
| 15    | CuI (5)     | --                      | DCE/MeOH= 2:1  | -10       | 2        | --              |

<sup>a</sup>Unless noted otherwise, the reaction was conducted with **1a** (0.2 mmol), **2** (0.4 mmol, 2.0 equiv), copper catalyst (0.02 mmol, 10 mol %), and base (0.4 mmol, 2.0 equiv) in indicated dry solvent (1.5 mL) for corresponding time under argon atmosphere. <sup>b</sup>NMR yield with 1,3,5-trimethylbenzene as internal standard. <sup>c</sup>Isolated yield.

## 4. General Procedure for the Synthesis of Racemic Silyl-substituted Allenes. (GP2)

### 4.1 Procedures for Synthesis of Products 3a-3x.

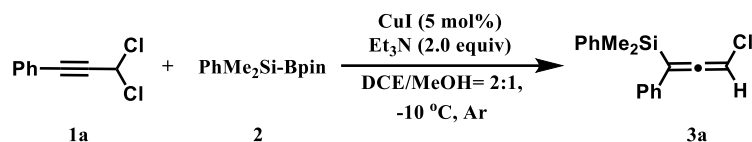

**3a:** A dried screw-vial seal tube was charged with CuI (1.9 mg, 0.01 mmol, 5 mol %) in glove box, then removed it out of the glove box. The tube was equipped with an argon balloon, dry Et<sub>3</sub>N (40.5 mg, 0.4 mmol, 2.0 equiv), dry DCE (1.0 mL) and dry MeOH (0.5 mL) were added into it. The mixture was stirred for 1 hour at room temperature to form a white suspension. Then the tube was cooled to -10 °C, **1a** (37 mg, 0.2 mmol, 1.0 equiv) and PhMe<sub>2</sub>Si-Bpin (105 mg, 0.4 mmol, 2.0 equiv) were added in sequence *via* syringe. It was continued to stir for 2 hours at -10 °C. The tube was opened quickly at room temperature, the final solution was filtered through celite using CH<sub>2</sub>Cl<sub>2</sub> (30 mL) under air. The filtrate was concentrated under reduced pressure to afford the crude product, which was purified by flash column chromatography on silica gel (eluent: PE) to obtain the desired product **3a** (45.0 mg, 79%) as yellow oil. <sup>1</sup>H NMR (400 MHz, CDCl<sub>3</sub>): δ 7.60 – 7.57 (m, 2H), 7.41 – 7.34 (m, 3H), 7.25 – 7.17 (m, 5H), 6.20 (s, 1H), 0.52 (s, 3H), 0.51 (s, 3H). <sup>13</sup>C NMR (100 MHz, CDCl<sub>3</sub>): δ 209.13, 139.01, 137.11, 136.00, 131.65, 130.65, 130.46, 130.14, 129.67, 113.03, 89.62, 0.06, 0.00. HRMS (EI): m/z calculated for C<sub>17</sub>H<sub>17</sub>ClSi[M]<sup>+</sup>: 284.0783, found: 284.0798. IR (KBr): 3053, 3021, 2959, 1921, 1490, 1428, 1304, 1251, 1211, 1113, 917, 835, 814, 781, 743, 696, 646.

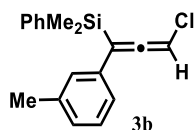

**3b:** A dried screw-vial seal tube was charged with CuI (1.9 mg, 0.01 mmol, 5 mol %) in glove box, then removed it out of the glove box. The tube was equipped with an argon balloon, dry Et<sub>3</sub>N (40.5 mg, 0.4 mmol, 2.0 equiv), dry DCE (1.0 mL) and dry MeOH (0.5 mL) were added into it. The mixture was stirred for 1 hour at room temperature to form a white suspension. Then the tube was cooled to -10 °C, **1b** (39.8 mg, 0.2 mmol, 1.0 equiv) and PhMe<sub>2</sub>Si-Bpin (105 mg, 0.4 mmol, 2.0 equiv) were added in sequence *via* syringe. It was continued to stir for 4 hours at -10 °C. The tube was opened quickly at room temperature, the final solution was filtered through celite using CH<sub>2</sub>Cl<sub>2</sub> (30 mL) under air. The filtrate was concentrated under reduced pressure to afford the crude product, which was purified by flash column chromatography on silica gel (eluent: PE) to obtain the desired product **3b** (36.9 mg, 62%) as yellow oil. <sup>1</sup>H NMR (400 MHz, CDCl<sub>3</sub>): δ 7.60 – 7.57 (m, 2H), 7.39 – 7.35 (m, 3H), 7.13 – 7.07 (m, 2H), 7.02 – 6.99 (m, 2H), 6.18 (s, 1H), 2.26 (s, 3H), 0.52(s, 3H), 0.51(s, 3H). <sup>13</sup>C NMR (100 MHz, CDCl<sub>3</sub>): δ 208.98, 140.27, 139.09, 137.01, 136.00, 131.59, 131.14, 130.47, 130.45, 130.09, 127.51, 113.12, 89.46, 23.43, 0.07, 0.00. HRMS (EI): m/z calculated for C<sub>18</sub>H<sub>19</sub>ClSi[M]<sup>+</sup>: 298.0939, found: 298.0941. IR (KBr): 3050, 2959, 2924, 2868, 1924, 1602, 1487, 1458, 1428, 1296, 1248, 1112, 949, 822, 781, 730, 699, 648.

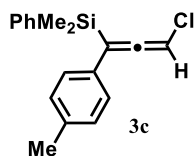

**3c**: A dried screw-vial seal tube was charged with CuI (1.9 mg, 0.01 mmol, 5 mol %) in glove box, then moved it out of the glove box. The tube was equipped with an argon balloon, dry Et<sub>3</sub>N (40.5 mg, 0.4 mmol, 2.0 equiv), dry DCE (1.0 mL) and dry MeOH (0.5 mL) were added into it. The mixture was stirred for 1 hour at room temperature to form a white suspension. Then the tube was cooled to -10 °C, **1c** (39.8 mg, 0.2 mmol, 1.0 equiv) and PhMe<sub>2</sub>Si-Bpin (105 mg, 0.4 mmol, 2.0 equiv) were added in sequence *via* syringe. It was continued to stir for 3 hours at -10 °C. The tube was opened quickly at room temperature, the final solution was filtered through celite using CH<sub>2</sub>Cl<sub>2</sub> (30 mL) under air. The filtrate was concentrated under reduced pressure to afford the crude product, which was purified by flash column chromatography on silica gel (eluent: PE) to obtain the desired product **3c** (42.9 mg, 72%) as yellow oil. <sup>1</sup>H NMR (400 MHz, CDCl<sub>3</sub>): δ 7.60 - 7.58 (m, 2H), 7.39 - 7.34 (m, 3H), 7.14 (d, *J* = 6.7 Hz, 2H), 7.07 (d, *J* = 7.7 Hz, 2H), 6.19 (s, 1H), 2.29 (s, 3H), 0.51 (s, 6H). <sup>13</sup>C NMR (100 MHz, CDCl<sub>3</sub>): δ 208.68, 139.50, 139.03, 135.87, 133.84, 131.46, 131.25, 130.27, 129.99, 112.65, 89.42, 23.09, 0.00, -0.07. HRMS (EI): *m/z* calculated for C<sub>18</sub>H<sub>19</sub>ClSi[M]<sup>+</sup>: 298.0939, found: 298.0951. IR (KBr): 3050, 3022, 2958, 2920, 1919, 1508, 1428, 1317, 1303, 1251, 1207, 1113, 908, 819, 780, 733, 701, 656.

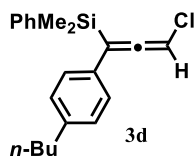

**3d**: A dried screw-vial seal tube was charged with CuI (1.9 mg, 0.01 mmol, 5 mol %) in glove box, then moved it out of the glove box. The tube was equipped with an argon balloon, dry Et<sub>3</sub>N (40.5 mg, 0.4 mmol, 2.0 equiv), dry DCE (1.0 mL) and dry MeOH (0.5 mL) were added into it. The mixture was stirred for 1 hour at room temperature to form a white suspension. Then the tube was cooled to -10 °C, **1d** (48.2 mg, 0.2 mmol, 1.0 equiv) and PhMe<sub>2</sub>Si-Bpin (105 mg, 0.4 mmol, 2.0 equiv) were added in sequence *via* syringe. It was continued to stir for 4 hours at -10 °C. The tube was opened quickly at room temperature, the final solution was filtered through celite using CH<sub>2</sub>Cl<sub>2</sub> (30 mL) under air. The filtrate was concentrated under reduced pressure to afford the crude product, which was purified by flash column chromatography on silica gel (eluent: PE) to obtain the desired product **3d** (51.4 mg, 75%) as yellow oil. <sup>1</sup>H NMR (400 MHz, CDCl<sub>3</sub>): δ 7.60 - 7.58 (m, 2H), 7.39 - 7.35 (m, 3H), 7.17 - 7.14 (m, 2H), 7.06 - 7.04 (m, 2H), 6.19 (s, 1H), 2.54 (t, *J* = 8.0 Hz, 2H), 1.58 - 1.52 (m, 3H), 1.36 - 1.27 (m, 2H), 0.89 (t, *J* = 7.9 Hz, 3H), 0.52 (s, 3H), 0.51 (s, 3H). <sup>13</sup>C NMR (100 MHz, CDCl<sub>3</sub>): δ 208.71, 144.53, 139.07, 135.87, 134.00, 131.43, 130.59, 130.25, 129.97, 112.71, 89.39, 37.23, 35.38, 24.26, 15.85, 0.00, -0.07. HRMS (EI): *m/z* calculated for C<sub>21</sub>H<sub>25</sub>ClSi[M]<sup>+</sup>: 340.1409, found: 340.1408. IR (KBr): 3050, 2957, 2929, 2858, 1919, 1507, 1457, 1428, 1310, 1251, 1213, 1113, 909, 835, 780, 734, 700, 658.

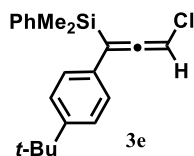

**3e**: A dried screw-vial seal tube was charged with  $\text{CuI}$  (1.9 mg, 0.01 mmol, 5 mol %) in glove box, then moved it out of the glove box. The tube was equipped with an argon balloon, dry  $\text{Et}_3\text{N}$  (40.5 mg, 0.4 mmol, 2.0 equiv), dry DCE (1.0 mL) and dry MeOH (0.5 mL) were added into it. The mixture was stirred for 1 hour at room temperature to form a white suspension. Then the tube was cooled to  $-10\text{ }^\circ\text{C}$ , **1e** (48.2 mg, 0.2 mmol, 1.0 equiv) and  $\text{PhMe}_2\text{Si-Bpin}$  (105 mg, 0.4 mmol, 2.0 equiv) were added in sequence *via* syringe. It was continued to stir for 3 hours at  $-10\text{ }^\circ\text{C}$ . The tube was opened quickly at room temperature, the final solution was filtered through celite using  $\text{CH}_2\text{Cl}_2$  (30 mL) under air. The filtrate was concentrated under reduced pressure to afford the crude product, which was purified by flash column chromatography on silica gel (eluent: PE) to obtain the desired product **3e** (62.8 mg, 87%) as yellow oil.  **$^1\text{H NMR}$  (400 MHz,  $\text{CDCl}_3$ )**:  $\delta$  7.61 - 7.59 (m, 2H), 7.39 - 7.34 (m, 3H), 7.27 - 7.25 (m, 2H), 7.20 - 7.18 (m, 2H), 6.19 (s, 1H), 1.27(s, 9H), 0.52 (s, 3H), 0.51(s, 3H).  **$^{13}\text{C NMR}$  (100 MHz,  $\text{CDCl}_3$ )**:  $\delta$  208.83, 152.68, 139.08, 135.84, 133.70, 131.41, 130.04, 129.96, 127.46, 112.47, 89.41, 36.45, 33.13, 0.00,  $-0.10$ . **HRMS (EI)**:  $m/z$  calculated for  $\text{C}_{21}\text{H}_{25}\text{ClSi}[\text{M}]^+$ : 340.1409, found: 340.1412. **IR (KBr)**: 3051, 2962, 2920, 2851, 1918, 1508, 1428, 1364, 1252, 1112, 913, 835, 813, 780, 732, 701, 654.

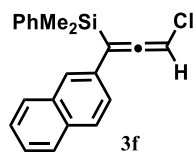

**3f**: A dried screw-vial seal tube was charged with  $\text{CuI}$  (3.8 mg, 0.01 mmol, 10 mol %) in glove box, then moved it out of the glove box. The tube was equipped with an argon balloon, dry  $\text{Et}_3\text{N}$  (40.5 mg, 0.4 mmol, 2.0 equiv), dry DCE (1.0 mL) and dry MeOH (0.5 mL) were added into it. The mixture was stirred for 1 hour at room temperature to form a white suspension. Then the tube was cooled to  $-10\text{ }^\circ\text{C}$ , **1f** (47 mg, 0.2 mmol, 1.0 equiv) and  $\text{PhMe}_2\text{Si-Bpin}$  (105 mg, 0.4 mmol, 2.0 equiv) were added in sequence *via* syringe. It was continued to stir for 4 hours at  $-10\text{ }^\circ\text{C}$ . The tube was opened quickly at room temperature, the final solution was filtered through celite using  $\text{CH}_2\text{Cl}_2$  (30 mL) under air. The filtrate was concentrated under reduced pressure to afford the crude product, which was purified by flash column chromatography on silica gel (eluent: PE) to obtain the desired product **3f** (71.7 mg, 52%) as yellow oil.  **$^1\text{H NMR}$  (400 MHz,  $\text{CDCl}_3$ )**:  $\delta$  7.70 - 7.77 (m, 2H), 7.59 - 7.66 (m, 4H), 7.35 - 7.45 (m, 6H), 6.27 (s, 1H), 0.58(s, 3H), 0.57(s, 3H).  **$^{13}\text{C NMR}$  (100 MHz,  $\text{CDCl}_3$ )**:  $\delta$  209.48, 138.94, 135.95, 135.28, 134.65, 134.39, 131.61, 130.19, 130.10, 130.06, 129.54, 129.50, 128.39, 128.16, 113.12, 89.82, 0.07, 0.00. **HRMS (EI)**:  $m/z$  calculated for  $\text{C}_{21}\text{H}_{19}\text{ClSi}[\text{M}]^+$ : 334.0939, found: 334.0946. **IR (KBr)**: 3052, 2958, 2920, 2850, 1916, 1596, 1504, 1427, 1406, 1288, 1251, 1185, 1113, 961, 914, 820, 735, 701, 656.

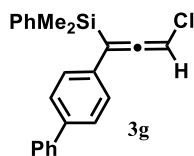

**3g**: A dried screw-vial seal tube was charged with CuI (1.9 mg, 0.01 mmol, 5 mol %) in glove box, then moved it out of the glove box. The tube was equipped with an argon balloon, dry  $\text{Et}_3\text{N}$  (40.5 mg, 0.4 mmol, 2.0 equiv), dry DCE (1.0 mL) and dry MeOH (0.5 mL) were added into it. The mixture was stirred for 1 hour at room temperature to form a white suspension. Then the tube was cooled to  $-10\text{ }^\circ\text{C}$ , **1g** (52.2 mg, 0.2 mmol, 1.0 equiv) and  $\text{PhMe}_2\text{Si-Bpin}$  (105 mg, 0.4 mmol, 2.0 equiv) were added in sequence *via* syringe. It was continued to stir for 3.5 hours at  $-10\text{ }^\circ\text{C}$ . The tube was opened quickly at room temperature, the final solution was filtered through celite using  $\text{CH}_2\text{Cl}_2$  (30 mL) under air. The filtrate was concentrated under reduced pressure to afford the crude product, which was purified by flash column chromatography on silica gel (eluent: PE) to obtain the desired product **3g** (45.5 mg, 63%) as yellow oil.  $^1\text{H NMR}$  (400 MHz,  $\text{CDCl}_3$ ):  $\delta$  7.63 – 7.60 (m, 2H), 7.55 – 7.52 (m, 2H), 7.48 – 7.46 (m, 2H), 7.40 – 7.38 (m, 6H), 7.33 – 7.30 (m, 2H), 6.24 (s, 1H), 0.55 (s, 3H), 0.54 (s, 3H).  $^{13}\text{C NMR}$  (100 MHz,  $\text{CDCl}_3$ ):  $\delta$  209.14, 142.40, 142.36, 138.86, 135.88, 135.85, 131.56, 130.77, 130.72, 130.05, 129.35, 129.20, 128.88, 112.51, 89.65, 0.00, -0.09. HRMS (EI):  $m/z$  calculated for  $\text{C}_{23}\text{H}_{21}\text{ClSi}[\text{M}]^+$ : 360.1096, found: 360.1108. IR (KBr): 3051, 3028, 2958, 1918, 1600, 1485, 1447, 1427, 1404, 1317, 1251, 1213, 1136, 1111, 1007, 909, 837, 780, 734, 697, 659.

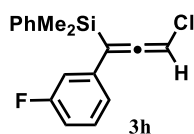

**3h**: A dried screw-vial seal tube was charged with CuI (1.9 mg, 0.01 mmol, 5 mol %) in glove box, then moved it out of the glove box. The tube was equipped with an argon balloon, dry  $\text{Et}_3\text{N}$  (40.5 mg, 0.4 mmol, 2.0 equiv), dry DCE (1.0 mL) and dry MeOH (0.5 mL) were added into it. The mixture was stirred for 1 hour at room temperature to form a white suspension. Then the tube was cooled to  $-10\text{ }^\circ\text{C}$ , **1h** (40.6 mg, 0.2 mmol, 1.0 equiv) and  $\text{PhMe}_2\text{Si-Bpin}$  (105 mg, 0.4 mmol, 2.0 equiv) were added in sequence *via* syringe. It was continued to stir for 3 hours at  $-10\text{ }^\circ\text{C}$ . The tube was opened quickly at room temperature, the final solution was filtered through celite using  $\text{CH}_2\text{Cl}_2$  (30 mL) under air. The filtrate was concentrated under reduced pressure to afford the crude product, which was purified by flash column chromatography on silica gel (eluent: PE) to obtain the desired product **3h** (41.9 mg, 69%) as yellow oil.  $^1\text{H NMR}$  (400 MHz,  $\text{CDCl}_3$ ):  $\delta$  7.58 – 7.56 (m, 2H), 7.41 – 7.36 (m, 3H), 7.21 – 7.16 (m, 1H), 6.99 – 6.87 (m, 3H), 6.22 (s, 1H), 0.52 (s, 3H), 0.51 (s, 3H).  $^{19}\text{F NMR}$  (376 MHz,  $\text{CDCl}_3$ ):  $\delta$  -112.77.  $^{13}\text{C NMR}$  (100 MHz,  $\text{CDCl}_3$ ):  $\delta$  207.41, 162.78 (d,  $J = 244.8$  Hz), 137.45 (d,  $J = 7.5$  Hz), 136.44, 133.87, 129.89 (d,  $J = 8.3$  Hz), 129.72, 128.14, 124.04 (d,  $J = 2.8$  Hz), 115.2, 115.0, 114.59, 114.38, 110.23, 87.80, -2.13, -2.22. HRMS (EI):  $m/z$  calculated for  $\text{C}_{17}\text{H}_{16}\text{SiClF}[\text{M}]^+$ : 302.0688, found: 302.0698. IR (KBr): 3053, 2960, 1927, 1608, 1583, 1483, 1428, 1315, 1241, 1113, 984, 874, 830, 785, 733, 701, 647.

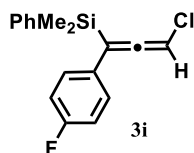

**3i:** A dried screw-vial seal tube was charged with CuI (1.9 mg, 0.01 mmol, 5 mol %) in glove box, then moved it out of the glove box. The tube was equipped with an argon balloon, dry Et<sub>3</sub>N (40.5 mg, 0.4 mmol, 2.0 equiv), dry DCE (1.0 mL) and dry MeOH (0.5 mL) were added into it. The mixture was stirred for 1 hour at room temperature to form a white suspension. Then the tube was cooled to -10 °C, **1i** (40.6 mg, 0.2 mmol, 1.0 equiv) and PhMe<sub>2</sub>Si-Bpin (105 mg, 0.4 mmol, 2.0 equiv) were added in sequence *via* syringe. It was continued to stir for 4 hours at -10 °C. The tube was opened quickly at room temperature, the final solution was filtered through celite using CH<sub>2</sub>Cl<sub>2</sub> (30 mL) under air. The filtrate was concentrated under reduced pressure to afford the crude product, which was purified by flash column chromatography on silica gel (eluent: PE) to obtain the desired product **3i** (46.6 mg, 77%) as yellow oil. <sup>1</sup>H NMR (400 MHz, CDCl<sub>3</sub>): δ 7.58 – 7.56 (m, 2H), 7.40 – 7.35 (m, 3H), 7.20 – 7.17 (m, 2H), 6.94 – 6.90 (m, 2H), 6.22 (s, 1H), 0.51 (s, 3H), 0.50 (s, 3H). <sup>19</sup>F NMR (376 MHz, CDCl<sub>3</sub>): δ -114.16. <sup>13</sup>C NMR (100 MHz, CDCl<sub>3</sub>): δ 209.08 (d, *J* = 1.8 Hz), 164.4 (d, *J* = 246.2 Hz), 138.80, 136.05, 133.10 (d, *J* = 3.4 Hz), 132.15 (d, *J* = 8.1 Hz), 131.86, 130.31, 117.72 (d, *J* = 21.5 Hz), 112.17, 89.89, 0.07, 0.00. HRMS (EI): *m/z* calculated for C<sub>17</sub>H<sub>16</sub>SiClF[M]<sup>+</sup>: 302.0688, found: 302.0703. IR (KBr): 3069, 2959, 2922, 1922, 1598, 1505, 1428, 1312, 1252, 1232, 1159, 1113, 908, 837, 781, 734, 701, 657.

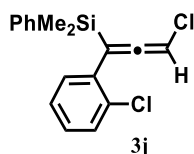

**3j:** A dried screw-vial seal tube was charged with CuI (1.9 mg, 0.01 mmol, 5 mol %) in glove box, then moved it out of the glove box. The tube was equipped with an argon balloon, dry Et<sub>3</sub>N (40.5 mg, 0.4 mmol, 2.0 equiv), dry DCE (1.0 mL) and dry MeOH (0.5 mL) were added into it. The mixture was stirred for 1 hour at room temperature to form a white suspension. Then the tube was cooled to -10 °C, **1j** (43.9 mg, 0.2 mmol, 1.0 equiv) and PhMe<sub>2</sub>Si-Bpin (105 mg, 0.4 mmol, 2.0 equiv) were added in sequence *via* syringe. It was continued to stir for 3.5 hours at -10 °C. The tube was opened quickly at room temperature, the final solution was filtered through celite using CH<sub>2</sub>Cl<sub>2</sub> (30 mL) under air. The filtrate was concentrated under reduced pressure to afford the crude product, which was purified by flash column chromatography on silica gel (eluent: PE) to obtain the desired product **3j** (31.1 mg, 49%) as colorless oil. <sup>1</sup>H NMR (400 MHz, CDCl<sub>3</sub>): δ 7.55 – 7.52 (m, 2H), 7.38 – 7.33 (m, 4H), 7.15 – 7.07 (m, 2H), 6.92 – 6.90 (m, 1H), 6.04 (s, 1H), 0.47 (s, 3H), 0.46 (s, 3H). <sup>13</sup>C NMR (100 MHz, CDCl<sub>3</sub>): δ 206.35, 136.26, 134.76, 133.98, 132.39, 129.82, 129.61, 129.46, 128.14, 127.90, 126.53, 108.78, 86.72, -2.74, -2.85. HRMS (EI): *m/z* calculated for C<sub>17</sub>H<sub>16</sub>SiCl<sub>2</sub>[M]<sup>+</sup>: 318.0393, found: 318.0391. IR (KBr): 3068, 2958, 1921, 1489, 1428, 1312, 1252, 1208, 1113, 1011, 908, 830, 780, 733, 700.



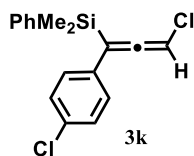

**3k:** A dried screw-vial seal tube was charged with CuI (1.9 mg, 0.01 mmol, 5 mol %) in glove box, then moved it out of the glove box. The tube was equipped with an argon balloon, dry Et<sub>3</sub>N (40.5 mg, 0.4 mmol, 2.0 equiv), dry DCE (1.0 mL) and dry MeOH (0.5 mL) were added into it. The mixture was stirred for 1 hour at room temperature to form a white suspension. Then the tube was cooled to -10 °C, **1k** (43.9 mg, 0.2 mmol, 1.0 equiv) and PhMe<sub>2</sub>Si-Bpin (105 mg, 0.4 mmol, 2.0 equiv) were added in sequence *via* syringe. It was continued to stir for 4 hours at -10 °C. The tube was opened quickly at room temperature, the final solution was filtered through celite using CH<sub>2</sub>Cl<sub>2</sub> (30 mL) under air. The filtrate was concentrated under reduced pressure to afford the crude product, which was purified by flash column chromatography on silica gel (eluent: PE) to obtain the desired product **3k** (38.4 mg, 60%) as yellow oil. **<sup>1</sup>H NMR (400 MHz, CDCl<sub>3</sub>):** δ 7.57 – 7.55 (m, 2H), 7.40 – 7.34 (m, 3H), 7.21 – 7.18 (m, 2H), 7.16 – 7.13 (m, 2H), 6.22 (s, 1H), 0.51 (s, 3H), 0.50 (s, 3H). **<sup>13</sup>C NMR (100 MHz, CDCl<sub>3</sub>):** δ 209.37, 138.71, 136.07, 135.74, 135.70, 131.92, 131.79, 130.95, 130.36, 112.22, 90.04, 0.08, 0.00. **HRMS (EI):** m/z calculated for C<sub>17</sub>H<sub>16</sub>SiCl<sub>2</sub>[M]<sup>+</sup>: 318.0393, found: 318.0392. **IR (KBr):** 3069, 3051, 2958, 1922, 1589, 1488, 1428, 1312, 1252, 1209, 1113, 1092, 1014, 905, 830, 781, 732, 701, 653.

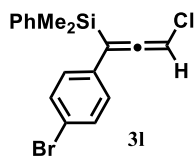

**3l:** A dried screw-vial seal tube was charged with CuI (1.9 mg, 0.01 mmol, 5 mol %) in glove box, then moved it out of the glove box. The tube was equipped with an argon balloon, dry Et<sub>3</sub>N (40.5 mg, 0.4 mmol, 2.0 equiv), dry DCE (1.0 mL) and dry MeOH (0.5 mL) were added into it. The mixture was stirred for 1 hour at room temperature to form a white suspension. Then the tube was cooled to -10 °C, **1l** (52.8 mg, 0.2 mmol, 1.0 equiv) and PhMe<sub>2</sub>Si-Bpin (105 mg, 0.4 mmol, 2.0 equiv) were added in sequence *via* syringe. It was continued to stir for 4 hours at -10 °C. The tube was opened quickly at room temperature, the final solution was filtered through celite using CH<sub>2</sub>Cl<sub>2</sub> (30 mL) under air. The filtrate was concentrated under reduced pressure to afford the crude product, which was purified by flash column chromatography on silica gel (eluent: PE) to obtain the desired product **3l** (37.8 mg, 52%) as yellow oil. **<sup>1</sup>H NMR (400 MHz, CDCl<sub>3</sub>):** δ 7.57 – 7.55 (m, 2H), 7.40 – 7.33 (m, 5H), 7.09 – 7.06 (m, 2H), 6.21 (s, 1H), 0.51 (s, 3H), 0.50 (s, 3H). **<sup>13</sup>C NMR (100 MHz, CDCl<sub>3</sub>):** δ 209.29, 138.61, 136.16, 135.99, 133.83, 132.02, 131.86, 130.29, 123.82, 112.21, 90.00, 0.00, -0.09. **HRMS (EI):** m/z calculated for C<sub>17</sub>H<sub>16</sub>SiClBr[M]<sup>+</sup>: 361.9888, found: 361.9901. **IR (KBr):** 3068, 3050, 2958, 1921, 1584, 1484, 1427, 1397, 1311, 1252, 1207, 1111, 1073, 1010, 906, 824, 736, 703, 652.

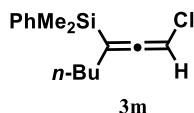

**3m:** A dried screw-vial seal tube was charged with CuI (1.9 mg, 0.01 mmol, 5 mol %) in glove box, then moved it out of the glove box. The tube was equipped with an argon balloon, dry Et<sub>3</sub>N (40.5 mg, 0.4 mmol, 2.0 equiv), dry DCE (1.0 mL) and dry MeOH (0.5 mL) were added into it. The mixture was stirred for 1 hour at room temperature to form a white suspension. Then the tube was cooled to -10 °C, **1m** (33 mg, 0.2 mmol, 1.0 equiv) and PhMe<sub>2</sub>Si-Bpin (105 mg, 0.4 mmol, 2.0 equiv) were added in sequence *via* syringe. It was continued to stir for 4 hours at -10 °C. The tube was opened quickly at room temperature, the final solution was filtered through celite using CH<sub>2</sub>Cl<sub>2</sub> (30 mL) under air. The filtrate was concentrated under reduced pressure to afford the crude product, which was purified by flash column chromatography on silica gel (eluent: PE) to obtain the desired product **3m** (39.8 mg, 75%) as slightly yellow oil. <sup>1</sup>H NMR (400 MHz, CDCl<sub>3</sub>): δ 7.53 – 7.51 (m, 2H), 7.39 – 7.35 (m, 3H), 5.91 (t, *J* = 2.4 Hz, 1H), 2.03 (tt, *J*<sub>1</sub> = 7.2 Hz, *J*<sub>2</sub> = 2.0 Hz, 2H), 1.40 (q, *J* = 7.4 Hz, 2H), 1.32 – 1.22 (m, 2H), 0.84 (t, *J* = 7.3 Hz), 0.42 (s, 6H). <sup>13</sup>C NMR (100 MHz, CDCl<sub>3</sub>): δ 203.67, 136.66, 133.85, 129.45, 127.90, 109.90, 86.70, 30.63, 29.64, 22.15, 13.84, -3.25, -3.35. HRMS (EI): *m/z* calculated for C<sub>14</sub>H<sub>18</sub>SiCl[M-CH<sub>3</sub>]<sup>+</sup>: 249.0861, found: 249.0870. IR (KBr): 3069, 2959, 2930, 1932, 1465, 1428, 1304, 1250, 1113, 1017, 835, 817, 780, 734, 700.

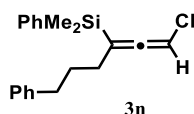

**3n:** A dried screw-vial seal tube was charged with CuI (1.9 mg, 0.01 mmol, 5 mol %) in glove box, then moved it out of the glove box. The tube was equipped with an argon balloon, dry Et<sub>3</sub>N (40.5 mg, 0.4 mmol, 2.0 equiv), dry DCE (1.0 mL) and dry MeOH (0.5 mL) were added into it. The mixture was stirred for 1 hour at room temperature to form a white suspension. Then the tube was cooled to -10 °C, **1n** (45 .4 mg, 0.2 mmol, 1.0 equiv) and PhMe<sub>2</sub>Si-Bpin (105 mg, 0.4 mmol, 2.0 equiv) were added in sequence *via* syringe. It was continued to stir for 4 hours at -10 °C. The tube was opened quickly at room temperature, the final solution was filtered through celite using CH<sub>2</sub>Cl<sub>2</sub> (30 mL) under air. The filtrate was concentrated under reduced pressure to afford the crude product, which was purified by flash column chromatography on silica gel (eluent: PE) to obtain the desired product **3n** (43 mg, 66%) as colorless oil. <sup>1</sup>H NMR (400 MHz, CDCl<sub>3</sub>): δ 7.54 – 7.50 (m, 2H), 7.39 - 7.35 (m, 3H), 7.24 – 7.22 (m, 2H), 7.18 – 7.15 (m, 1H), 7.11 – 7.09 (m, 2H), 5.96 – 5.93 (m, 1H), 2.62 – 2.50 (m, 2H), 2.10 – 2.06 (m, 2H), 1.80 – 1.72 (m, 2H), 0.43 (s, 3H), 0.42 (s, 3H). <sup>13</sup>C NMR (100 MHz, CDCl<sub>3</sub>): δ 203.74, 142.17, 136.54, 133.89, 129.55, 128.49, 128.31, 127.99, 125.76, 109.51, 87.05, 35.11, 30.22, 29.39, -3.25, -3.38. HRMS (EI): *m/z* calculated for C<sub>20</sub>H<sub>23</sub>SiCl[M]<sup>+</sup>: 326.1252, found: 326.1257. IR (KBr): 3067, 3025, 2934, 2857, 1931, 1603, 1496, 1454, 1428, 1303, 1250, 1112, 1066, 1030, 997, 815, 780, 745, 699, 647.

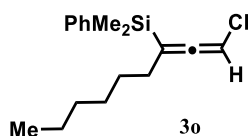

**3o**: A dried screw-vial seal tube was charged with CuI (1.9 mg, 0.01 mmol, 5 mol %) in glove box, then moved it out of the glove box. The tube was equipped with an argon balloon, dry Et<sub>3</sub>N (40.5 mg, 0.4 mmol, 2.0 equiv), dry DCE (1.0 mL) and dry MeOH (0.5 mL) were added into it. The mixture was stirred for 1 hour at room temperature to form a white suspension. Then the tube was cooled to -10 °C, **1o** (38.6 mg, 0.2 mmol, 1.0 equiv) and PhMe<sub>2</sub>Si-Bpin (105 mg, 0.4 mmol, 2.0 equiv) were added in sequence *via* syringe. It was continued to stir for 4 hours at -10 °C. The tube was opened quickly at room temperature, the final solution was filtered through celite using CH<sub>2</sub>Cl<sub>2</sub> (30 mL) under air. The filtrate was concentrated under reduced pressure to afford the crude product, which was purified by flash column chromatography on silica gel (eluent: PE) to obtain the desired product **3o** (44.7 mg, 76%) as yellow oil. <sup>1</sup>H NMR (400 MHz, CDCl<sub>3</sub>): δ 7.53 – 7.50 (m, 2H), 7.38 – 7.34 (m, 3H), 5.90 (t, *J* = 2.4 Hz, 1H), 2.02 (td, *J*<sub>1</sub> = 7.2 Hz, *J*<sub>2</sub> = 1.1 Hz, 2H), 1.44 – 1.38 (m, 2H), 1.28 – 1.18 (m, 6H), 0.85 (t, *J* = 6.7 Hz, 3H), 0.42 (s, 6H). <sup>13</sup>C NMR (100 MHz, CDCl<sub>3</sub>): δ 203.70, 136.68, 133.86, 129.46, 127.92, 109.92, 86.72, 31.62, 29.97, 28.75, 28.48, 22.60, 14.07, -3.23, -3.34. HRMS (EI): *m/z* calculated for C<sub>17</sub>H<sub>25</sub>SiCl[M]<sup>+</sup>: 292.1409, found: 292.1415. IR (KBr): 3070, 2958, 2928, 2857, 1933, 1428, 1305, 1250, 1113, 835, 816, 780, 733, 699.

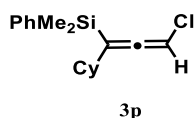

**3p**: A dried screw-vial seal tube was charged with CuI (1.9 mg, 0.01 mmol, 5 mol %) in glove box, then moved it out of the glove box. The tube was equipped with an argon balloon, dry Et<sub>3</sub>N (40.5 mg, 0.4 mmol, 2.0 equiv), dry DCE (1.0 mL) and dry MeOH (0.5 mL) were added into it. The mixture was stirred for 1 hour at room temperature to form a white suspension. Then the tube was cooled to -10 °C, **1p** (38.2 mg, 1.0 equiv) and PhMe<sub>2</sub>Si-Bpin (105 mg, 0.4 mmol, 2.0 equiv) were added in sequence *via* syringe. It was continued to stir for 4 hours at -10 °C. The tube was opened quickly at room temperature, the final solution was filtered through celite using CH<sub>2</sub>Cl<sub>2</sub> (30 mL) under air. The filtrate was concentrated under reduced pressure to afford the crude product, which was purified by flash column chromatography on silica gel (eluent: PE) to obtain the desired product **3p** (38.6 mg, 66%) as colorless oil. <sup>1</sup>H NMR (400 MHz, CDCl<sub>3</sub>): δ 7.54 – 7.51 (m, 2H), 7.40 – 7.33 (m, 3H), 5.91 (d, *J* = 1.4 Hz, 1H), 1.92 (t, *J* = 9.8 Hz, 1H), 1.71 – 1.66 (m, 4H), 1.59 (s, 1H), 1.22 – 1.08 (m, 5H), 0.42 (s, 3H), 0.42 (s, 3H). <sup>13</sup>C NMR (100 MHz, CDCl<sub>3</sub>): δ 203.93, 137.10, 133.85, 129.37, 127.86, 115.30, 87.11, 39.59, 33.57, 33.53, 26.40, 26.34, 25.93, -2.67, -2.76. HRMS (EI): *m/z* calculated for C<sub>17</sub>H<sub>23</sub>SiCl[M]<sup>+</sup>: 290.1252, found: 290.1264. IR (KBr): 3069, 2926, 2852, 1926, 1448, 1428, 1286, 1250, 1113, 1022, 977, 819, 759, 730, 700, 651.

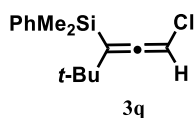

**3q**: A dried screw-vial seal tube was charged with CuI (1.9 mg, 0.01 mmol, 5 mol %) in glove box, then moved it out of the glove box. The tube was equipped with an argon balloon, dry Et<sub>3</sub>N (40.5 mg, 0.4 mmol, 2.0 equiv), dry DCE (1.0 mL) and dry MeOH (0.5 mL) were added into it. The mixture was stirred for 1 hour at room temperature to form a white

suspension. Then the tube was cooled to  $-10\text{ }^{\circ}\text{C}$ , **1q** (33.0 mg, 0.2 mmol, 1.0 equiv) and  $\text{PhMe}_2\text{Si-Bpin}$  (105 mg, 0.4 mmol, 2.0 equiv) were added in sequence *via* syringe. It was continued to stir for 4 hours at  $-10\text{ }^{\circ}\text{C}$ . The tube was opened quickly at room temperature, the final solution was filtered through celite using  $\text{CH}_2\text{Cl}_2$  (30 mL) under air. The filtrate was concentrated under reduced pressure to afford the crude product, which was purified by flash column chromatography on silica gel (eluent: PE) to obtain the desired product **3q** (33.3 mg, 63%) as yellow oil.  **$^1\text{H NMR}$  (400 MHz,  $\text{CDCl}_3$ ):**  $\delta$  7.55 – 7.53 (m, 2H), 7.36 – 7.33 (m, 3H), 5.89 (s, 1H), 1.03 (s, 9H), 0.49 (s, 3H), 0.47 (s, 3H).  **$^{13}\text{C NMR}$  (100 MHz,  $\text{CDCl}_3$ ):**  $\delta$  204.78, 138.94, 134.75, 130.05, 128.65, 120.69, 87.66, 37.20, 31.81, 0.22, 0.00. **HRMS (EI):**  $m/z$  calculated for  $\text{C}_{14}\text{H}_{18}\text{SiCl}[\text{M}-\text{CH}_3]^+$ : 249.0861, found: 249.0864. **IR** (KBr): 3069, 2964, 1933, 1428, 1363, 1292, 1113, 953, 837, 820, 777, 745, 701, 657.

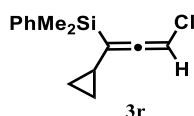

**3r:** A dried screw-vial seal tube was charged with  $\text{CuI}$  (1.9 mg, 0.01 mmol, 5 mol %) in glove box, then moved it out of the glove box. The tube was equipped with an argon balloon, dry  $\text{Et}_3\text{N}$  (40.5 mg, 0.4 mmol, 2.0 equiv), dry DCE (1.0 mL) and dry MeOH (0.5 mL) were added into it. The mixture was stirred for 1 hour at room temperature to form a white suspension. Then the tube was cooled to  $-10\text{ }^{\circ}\text{C}$ , **1r** (29.8 mg, 0.2 mmol, 1.0 equiv) and  $\text{PhMe}_2\text{Si-Bpin}$  (105 mg, 0.4 mmol, 2.0 equiv) were added in sequence *via* syringe. It was continued to stir for 4 hours at  $-10\text{ }^{\circ}\text{C}$ . The tube was opened quickly at room temperature, the final solution was filtered through celite using  $\text{CH}_2\text{Cl}_2$  (30 mL) under air. The filtrate was concentrated under reduced pressure to afford the crude product, which was purified by flash column chromatography on silica gel (eluent: PE) to obtain the desired product **3r** (34.1 mg, 69%) as colorless oil.  **$^1\text{H NMR}$  (400 MHz,  $\text{CDCl}_3$ ):**  $\delta$  7.58 – 7.55 (m, 2H), 7.40 – 7.36 (m, 3H), 5.93 (d,  $J = 1.0\text{ Hz}$ , 1H), 1.17 – 1.10 (m, 1H), 0.78 – 0.68 (m, 2H), 0.55 – 0.47 (m, 2H), 0.46 (s, 3H), 0.46 (s, 3H).  **$^{13}\text{C NMR}$  (100 MHz,  $\text{CDCl}_3$ ):**  $\delta$  201.24, 136.67, 133.95, 129.48, 127.90, 114.97, 87.98, 10.29, 9.55, 9.30, -3.02, -3.11. **HRMS (EI):**  $m/z$  calculated for  $\text{C}_{14}\text{H}_{17}\text{SiCl}[\text{M}]^+$ : 248.0783, found: 248.0791. **IR** (KBr): 3070, 3003, 2960, 2926, 1930, 1428, 1315, 1250, 1201, 1113, 999, 855, 833, 814, 779, 735, 700.

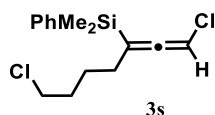

**3s:** A dried screw-vial seal tube was charged with  $\text{CuI}$  (1.9 mg, 0.01 mmol, 5 mol %) in glove box, then moved it out of the glove box. The tube was equipped with an argon balloon, dry  $\text{Et}_3\text{N}$  (40.5 mg, 0.4 mmol, 2.0 equiv), dry DCE (1.0 mL) and dry MeOH (0.5 mL) were added into it. The mixture was stirred for 1 hour at room temperature to form a white suspension. Then the tube was cooled to  $-10\text{ }^{\circ}\text{C}$ , **1s** (39.9 mg, 0.2 mmol, 1.0 equiv) and  $\text{PhMe}_2\text{Si-Bpin}$  (105 mg, 0.4 mmol, 2.0 equiv) were added in sequence *via* syringe. It was continued to stir for 3.5 hours at  $-10\text{ }^{\circ}\text{C}$ . The tube was opened quickly at room temperature, the final solution was filtered through celite using  $\text{CH}_2\text{Cl}_2$  (30 mL) under air. The filtrate was concentrated under reduced pressure to afford the crude product, which was purified by flash column

chromatography on silica gel (eluent: PE) to obtain the desired product **3s** (57.4 mg, 96%) as slightly yellow oil. **<sup>1</sup>H NMR (400 MHz, CDCl<sub>3</sub>):** δ 7.53 – 7.50 (m, 2H), 7.39 – 7.34 (m, 3H), 5.94 (t, *J* = 2.4 Hz, 1H), 3.45 (t, *J* = 6.6 Hz, 2H), 2.06 (td, *J*<sub>1</sub> = 7.2 Hz, *J*<sub>2</sub> = 2.4 Hz, 2H), 1.77 – 1.68 (m, 2H), 1.61 – 1.56 (m, 2H), 0.43 (s, 6H). **<sup>13</sup>C NMR (100 MHz, CDCl<sub>3</sub>):** δ 203.73, 136.37, 133.83, 129.59, 128.00, 109.29, 87.12, 44.75, 31.80, 29.09, 25.64, -3.31, -3.43. **HRMS (EI):** *m/z* calculated for C<sub>14</sub>H<sub>17</sub>SiCl<sub>2</sub>[M-CH<sub>3</sub>]<sup>+</sup>: 283.0471, found: 283.0480. **IR (KBr):** 3069, 2957, 1933, 1447, 1428, 1305, 1251, 1112, 997, 835, 816, 781, 735, 701, 649.

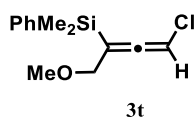

**3t:** A dried screw-vial seal tube was charged with CuI (1.9 mg, 0.01 mmol, 5 mol %) in glove box, then moved it out of the glove box. The tube was equipped with an argon balloon, dry Et<sub>3</sub>N (40.5 mg, 0.4 mmol, 2.0 equiv), dry DCE (1.0 mL) and dry MeOH (0.5 mL) were added into it. The mixture was stirred for 1 hour at room temperature to form a white suspension. Then the tube was cooled to -10 °C, **1t** (30.6 mg, 0.2 mmol, 1.0 equiv) and PhMe<sub>2</sub>Si-Bpin (105 mg, 0.4 mmol, 2.0 equiv) were added in sequence *via* syringe. It was continued to stir for 3.5 hours at -10 °C. The tube was opened quickly at room temperature, the final solution was filtered through celite using CH<sub>2</sub>Cl<sub>2</sub> (30 mL) under air. The filtrate was concentrated under reduced pressure to afford the crude product, which was purified by flash column chromatography on silica gel (eluent: PE/Et<sub>2</sub>O = 97:3) to obtain the desired product **3t** (41.5 mg, 82%) as colorless oil. **<sup>1</sup>H NMR (400 MHz, CDCl<sub>3</sub>):** δ 7.56 – 7.53 (m, 2H), 7.39 – 7.36 (m, 3H), 5.98 (t, *J* = 2.1 Hz, 1H), 4.04 – 3.96 (m, 2H), 3.25 (s, 3H), 0.46 (s, 6H). **<sup>13</sup>C NMR (100 MHz, CDCl<sub>3</sub>):** δ 203.97, 136.13, 133.86, 129.57, 127.93, 107.38, 86.99, 71.15, 58.10, -3.08, -3.12. **HRMS (EI):** *m/z* calculated for C<sub>13</sub>H<sub>17</sub>SiClO[M]<sup>+</sup>: 252.0732, found: 252.0740. **IR (KBr):** 3069, 2925, 2821, 1940, 1912, 1428, 1369, 1311, 1250, 1192, 1113, 969, 910, 837, 818, 781, 734, 700.

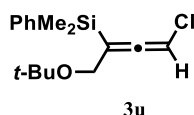

**3u:** A dried screw-vial seal tube was charged with CuI (1.9 mg, 0.01 mmol, 5 mol %) in glove box, then moved it out of the glove box. The tube was equipped with an argon balloon, dry Et<sub>3</sub>N (40.5 mg, 0.4 mmol, 2.0 equiv), dry DCE (1.0 mL) and dry MeOH (0.5 mL) were added into it. The mixture was stirred for 1 hour at room temperature to form a white suspension. Then the tube was cooled to -10 °C, and **1u** (39.0 mg, 0.2 mmol, 1.0 equiv) and PhMe<sub>2</sub>Si-Bpin (105 mg, 0.4 mmol, 2.0 equiv) were added in sequence *via* syringe. It was continued to stir for 4 hours at -10 °C. The tube was opened quickly at room temperature, the final solution was filtered through celite using CH<sub>2</sub>Cl<sub>2</sub> (30 mL) under air. The filtrate was concentrated under reduced pressure to afford the crude product, which was purified by flash column chromatography on silica gel (eluent: PE/Et<sub>2</sub>O = 98:2) to obtain the desired product **3u** (56.8 mg, 96%) as slightly yellow oil. **<sup>1</sup>H NMR (400 MHz, CDCl<sub>3</sub>):** δ 7.57 – 7.54 (m, 2H), 7.38 – 7.25 (m, 3H), 5.93 (t, *J* = 2.1 Hz, 1H), 4.01 (d, *J* = 2.1 Hz, 2H), 1.09 (s, 9H), 0.46 (s, 3H), 0.45 (s, 3H). **<sup>13</sup>C NMR (100 MHz, CDCl<sub>3</sub>):** δ 203.71, 136.73, 134.00, 129.34, 127.76,

109.26, 86.67, 73.66, 61.43, 27.34, -2.62, -2.66. **HRMS (EI):**  $m/z$  calculated for  $C_{15}H_{20}SiClO[M-CH_3]^+$ : 279.0966, found: 279.0968. **IR (KBr):** 3070, 2974, 2933, 1940, 1428, 1389, 1363, 1304, 1249, 1194, 1114, 1076, 880, 837, 817, 781, 733, 700.

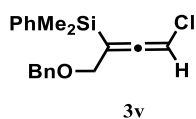

**3v:** A dried screw-vial seal tube was charged with CuI (1.9 mg, 0.01 mmol, 5 mol %) in glove box, then moved it out of the glove box. The tube was equipped with an argon balloon, dry  $Et_3N$  (40.5 mg, 0.4 mmol, 2.0 equiv), dry DCE (1.0 mL) and dry MeOH (0.5 mL) were added into it. The mixture was stirred for 1 hour at room temperature to form a white suspension. Then the tube was cooled to  $-10\text{ }^\circ\text{C}$ , and **1v** (45.8 mg, 0.2 mmol, 1.0 equiv) and PhMe<sub>2</sub>Si-Bpin (105 mg, 0.4 mmol, 2.0 equiv) were added in sequence *via* syringe. It was continued to stir for 4 hours at  $-10\text{ }^\circ\text{C}$ . The tube was opened quickly at room temperature, the final solution was filtered through celite using  $CH_2Cl_2$  (30 mL) under air. The filtrate was concentrated under reduced pressure to afford the crude product, which was purified by flash column chromatography on silica gel (eluent: PE/ $Et_2O$  = 98:2) to obtain the desired product **3v** (61.3 mg, 93%) as yellow oil. **<sup>1</sup>H NMR (400 MHz,  $CDCl_3$ ):**  $\delta$  7.55 – 7.52 (m, 2H), 7.39 – 7.32 (m, 4H), 7.31 – 7.27 (m, 2H), 7.24 – 7.22 (m, 2H), 5.99 (t,  $J$  = 2.0 Hz, 1H), 4.41 (q,  $J$  = 11.8 Hz, 2H), 4.16 – 4.08 (m, 2H), 0.46 (s, 6H). **<sup>13</sup>C NMR (100 MHz,  $CDCl_3$ ):**  $\delta$  204.34, 137.81, 136.19, 133.91, 129.55, 128.33, 127.94, 127.85, 127.63, 107.42, 87.00, 72.09, 68.76, -2.98, -3.05. **HRMS (EI):**  $m/z$  calculated for  $C_{19}H_{21}SiO[M-Cl]^+$ : 293.1356, found: 293.1363. **IR (KBr):** 3067, 2958, 2852, 1940, 1911, 1455, 1428, 1350, 1304, 1250, 1113, 837, 817, 781, 734, 698.

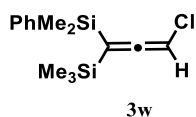

**3w:** A dried screw-vial seal tube was charged with CuI (3.8 mg, 0.01 mmol, 10 mol %) in glove box, then moved it out of the glove box. The tube was equipped with an argon balloon, dry  $Et_3N$  (40.5 mg, 0.4 mmol, 2.0 equiv), dry DCE (1.0 mL) and dry MeOH (0.5 mL) were added into it. The mixture was stirred for 1 hour at room temperature to form a white suspension. Then the tube was cooled to  $-10\text{ }^\circ\text{C}$ , **1w** (36.2 mg, 0.2 mmol, 1.0 equiv) and PhMe<sub>2</sub>Si-Bpin (105 mg, 0.4 mmol, 2.0 equiv) were added in sequence *via* syringe. It was continued to stir for 3.5 hours at  $-10\text{ }^\circ\text{C}$ . The tube was opened quickly at room temperature, the final solution was filtered through celite using  $CH_2Cl_2$  (30 mL) under air. The filtrate was concentrated under reduced pressure to afford the crude product, which was purified by flash column chromatography on silica gel (eluent: PE) to obtain the desired product **3w** (21.2 mg, 38%) as slightly yellow oil. **<sup>1</sup>H NMR (400 MHz,  $CDCl_3$ ):**  $\delta$  7.54 – 7.51 (m, 2H), 7.39 – 7.35 (m, 3H), 5.66 (s, 1H), 0.46 (s, 6H), 0.04 (s, 9H). **<sup>13</sup>C NMR (100 MHz,  $CDCl_3$ ):**  $\delta$  209.09, 137.76, 134.19, 129.71, 128.14, 103.49, 81.16, 0.00, -1.42, -1.49. **HRMS (EI):**  $m/z$  calculated for  $C_{14}H_{21}ClSi_2[M]^+$ : 280.0865, found: 280.0879. **IR (KBr):** 3070, 2959, 1922, 1429, 1273, 1251, 1112, 883, 842, 807, 751, 732, 700.

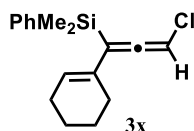

**3x:** A dried screw-vial seal tube was charged with CuI (1.9 mg, 0.01 mmol, 5 mol %) in glove box, then moved it out of the glove box. The tube was equipped with an argon balloon, dry Et<sub>3</sub>N (40.5 mg, 0.4 mmol, 2.0 equiv), dry DCE (1.0 mL) and dry MeOH (0.5 mL) were added into it. The mixture was stirred for 1 hour at room temperature to form a white suspension. Then the tube was cooled to -10 °C, **1x** (37.8 mg, 0.2 mmol, 1.0 equiv) and PhMe<sub>2</sub>Si-Bpin (105 mg, 0.4 mmol, 2.0 equiv) were added in sequence *via* syringe. It was continued to stir for 3 hours at -10 °C. The tube was opened quickly at room temperature, the final solution was filtered through celite using CH<sub>2</sub>Cl<sub>2</sub> (30 mL) under air. The filtrate was concentrated under reduced pressure to afford the crude product, which was purified by flash column chromatography on silica gel (eluent: PE) to obtain the desired product **3x** (25.9 mg, 45%) as yellow oil. <sup>1</sup>H NMR (400 MHz, CDCl<sub>3</sub>): δ 7.55 – 7.52 (m, 2H), 7.38 – 7.34 (m, 3H), 6.03 (s, 1H), 5.70 (t, *J* = 3.6 Hz, 1H), 2.13 – 2.10 (m, 2H), 2.02 – 1.99 (m, 2H), 1.66 – 1.60 (m, 2H), 1.55 – 1.48 (m, 2H), 0.46 (s, 6H). <sup>13</sup>C NMR (100 MHz, CDCl<sub>3</sub>): δ 207.36, 139.25, 135.32, 133.78, 132.28, 130.76, 129.39, 114.53, 88.97, 29.59, 27.69, 24.25, 23.47, 0.00, -0.06. HRMS (EI): *m/z* calculated for C<sub>17</sub>H<sub>21</sub>SiCl[M]<sup>+</sup>: 288.1096, found: 288.1097. IR (KBr): 3068, 2931, 2858, 1909, 1709, 1585, 1428, 1311, 1250, 1188, 1113, 998, 838, 777, 731, 700, 652.

#### 4.2 The results of reactions between different silylboronates with **1a**.

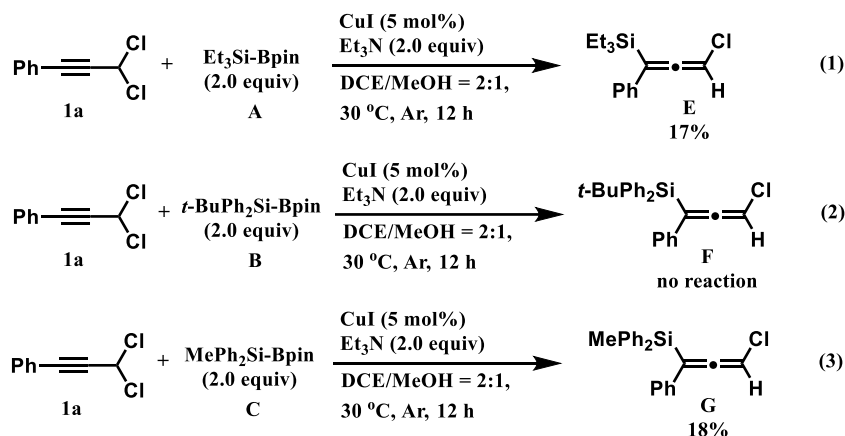

Procedures for the reaction between **1a** and silylboronate **A**:

**E:** A dried seal tube was charged with CuI (1.9 mg, 0.01 mmol, 5 mol %) in glove box, then moved it out of the glove box. The tube was equipped with an argon balloon, dry Et<sub>3</sub>N (40.5 mg, 0.4 mmol, 2.0 equiv), dry DCE (1.0 mL) and dry MeOH (0.5 mL) were added into it. The mixture was stirred for 1 hour at room temperature to form a white suspension. Then **1a** (37.0 mg, 0.2 mmol, 1.0 equiv) and Et<sub>3</sub>Si-Bpin (96.9 mg, 0.4 mmol, 2.0 equiv) were added in sequence *via* syringe. It was continued to stir for 12 hours at 30 °C. The tube was opened quickly at room temperature, the final solution was filtered through celite using CH<sub>2</sub>Cl<sub>2</sub> (30





was purified by flash column chromatography on silica gel (eluent: PE) to obtain the desired product (*S*)-**3c** (36.8 mg, 62%) as yellow oil.

$[\alpha]_{\text{D}}^{20} +208.9^{\circ}$  ( $c = 1.19$ ,  $\text{CH}_2\text{Cl}_2$ )

The enantiomeric excess of (*S*)-**3c** was determined by chiral HPLC analysis on Chiralcel OJ column. Conditions: hexane/isopropanol = 99:1, flow rate = 0.5 mL/min, UV-Vis detection at  $\lambda = 273$  nm,  $t_{\text{R}1} = 10.2$  min (minor),  $t_{\text{R}2} = 16.1$  min (major), 20 °C, ee = 90%.

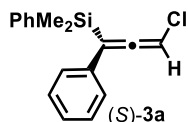

(*S*)-**3a**: A dried screw-vial seal tube was charged with  $\text{CuF}_2$  (2.0 mg, 0.02 mmol, 10 mol %) and ligand **L**<sub>5</sub> (19.5 mg, 0.04 mmol, 20 mol%) in glove box, then moved it out of the glove box. The tube was equipped with an argon balloon, TMP (56.5 mg, 0.4 mmol, 2.0 equiv) and extra dry MeOH (1.0 mL) were added into it. The mixture was stirred for 1 hour at room temperature to form a white solution. Then the tube was cooled to -30 °C, **1a** (37 mg, 0.2 mmol, 1.0 equiv) and PhMe<sub>2</sub>Si-Bpin (105 mg, 0.4 mmol, 2.0 equiv) were added in sequence via syringe. It was continued to stir for 4 hours at -30 °C. The tube was opened quickly at room temperature, the final solution was filtered through celite using  $\text{CH}_2\text{Cl}_2$  (30 mL) under air. The filtrate was concentrated under reduced pressure to afford the crude product, which was purified by flash column chromatography on silica gel (eluent: PE) to obtain the desired product (*S*)-**3a** (33.2 mg, 56%) as yellow oil.

$[\alpha]_{\text{D}}^{20} +199.7^{\circ}$  ( $c = 1.00$ ,  $\text{CH}_2\text{Cl}_2$ )

The enantiomeric excess of (*S*)-**3a** was determined by chiral HPLC analysis on Chiralcel OJ column. Conditions: hexane/isopropanol = 99:1, flow rate = 0.5 mL/min, UV-Vis detection at  $\lambda = 273$  nm,  $t_{\text{R}1} = 10.4$  min (minor),  $t_{\text{R}2} = 14.3$  min (major), 20 °C, ee = 89%.

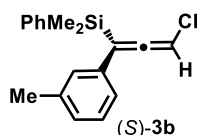

(*S*)-**3b**: A dried screw-vial seal tube was charged with  $\text{CuF}_2$  (2.0 mg, 0.02 mmol, 10 mol %) and ligand **L**<sub>5</sub> (19.5 mg, 0.04 mmol, 20 mol%) in glove box, then moved it out of the glove box. The tube was equipped with an argon balloon, TMP (56.5 mg, 0.4 mmol, 2.0 equiv) and extra dry MeOH (1.0 mL) were added into it. The mixture was stirred for 1 hour at room temperature to form a white solution. Then the tube was cooled to -30 °C, **1b** (39.8 mg, 0.2 mmol, 1.0 equiv) and PhMe<sub>2</sub>Si-Bpin (105 mg, 0.4 mmol, 2.0 equiv) were added in sequence *via* syringe. It was continued to stir for 4.5 hours at -30 °C. The tube was opened quickly at room temperature, the final solution was filtered through celite using  $\text{CH}_2\text{Cl}_2$  (30 mL) under air. The filtrate was concentrated under reduced pressure to afford the crude product, which was purified by flash column chromatography on silica gel (eluent: PE) to obtain the desired product (*S*)-**3b** (48.2 mg, 81%) as yellow oil.

$[\alpha]_{\text{D}}^{20} +92.8^{\circ}$  ( $c = 1.19$ ,  $\text{CH}_2\text{Cl}_2$ )

The enantiomeric excess of (*S*)-**3b** was determined by chiral HPLC analysis on Chiralcel OD-H column. Conditions: hexane/isopropanol = 100:0, flow rate = 0.6 mL/min, UV-Vis

detection at  $\lambda = 210$  nm,  $t_{R1} = 13.3$  min (major),  $t_{R2} = 22.4$  min (minor), 20 °C, ee = 91%.

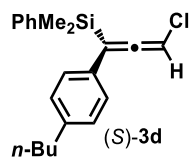

(S)-**3d**: A dried screw-vial seal tube was charged with CuF<sub>2</sub> (2.0 mg, 0.02 mmol, 10 mol %) and ligand **L**<sub>5</sub> (19.5 mg, 0.04 mmol, 20 mol%) in glove box, then moved it out of the glove box. The tube was equipped with an argon balloon, TMP (56.5 mg, 0.4 mmol, 2.0 equiv) and extra dry MeOH (1.0 mL) were added into it. The mixture was stirred for 1 hour at room temperature to form a white solution. Then the tube was cooled to -30 °C, **1d** (48.2 mg, 0.2 mmol, 1.0 equiv) and PhMe<sub>2</sub>Si-Bpin (105 mg, 0.4 mmol, 2.0 equiv) were added in sequence via syringe. It was continued to stir for 7 hours at -30 °C. The tube was opened quickly at room temperature, the final solution was filtered through celite using CH<sub>2</sub>Cl<sub>2</sub> (30 mL) under air. The filtrate was concentrated under reduced pressure to afford the crude product, which was purified by flash column chromatography on silica gel (eluent: PE) to obtain the desired product (S)-**3d** (35.4 mg, 52%) as yellow oil.

$[\alpha]_D^{20} +110.9^\circ$  (c = 1.02, CH<sub>2</sub>Cl<sub>2</sub>)

The enantiomeric excess of (S)-**3d** was determined by chiral HPLC analysis on Chiralcel OD-H column. Conditions: hexane/isopropanol = 100:0, flow rate = 0.6 mL/min, UV-Vis detection at  $\lambda = 210$  nm,  $t_{R1} = 12.1$  min (major),  $t_{R2} = 15.3$  min (minor), 20 °C, ee = 88%.

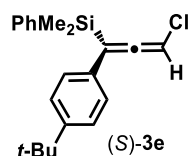

(S)-**3e**: A dried screw-vial seal tube was charged with CuF<sub>2</sub> (2.0 mg, 0.02 mmol, 10 mol %) and ligand **L**<sub>5</sub> (19.5 mg, 0.04 mmol, 20 mol %) in glove box, then moved it out of the glove box. The tube was equipped with an argon balloon, TMP (56.5 mg, 0.4 mmol, 2.0 equiv) and extra dry MeOH (1.0 mL) were added into it. The mixture was stirred for 1 hour at room temperature to form a white solution. Then the tube was cooled to -30 °C, **1e** (48.2 mg, 0.2 mmol, 1.0 equiv) and PhMe<sub>2</sub>Si-Bpin (105 mg, 0.4 mmol, 2.0 equiv) were added in sequence via syringe. It was continued to stir for 15 hours at -30 °C. The tube was opened quickly at room temperature, the final solution was filtered through celite using CH<sub>2</sub>Cl<sub>2</sub> (30 mL) under air. The filtrate was concentrated under reduced pressure to afford the crude product, which was purified by flash column chromatography on silica gel (eluent: PE) to obtain the desired product (S)-**3e** (47.7 mg, 70%) as yellow oil.

$[\alpha]_D^{20} +100.3^\circ$  (c = 1.06, CH<sub>2</sub>Cl<sub>2</sub>)

The enantiomeric excess of (S)-**3e** was determined by chiral HPLC analysis on Chiralcel OJ column. Conditions: hexane/isopropanol = 95:5, flow rate = 0.6 mL/min, UV-Vis detection at  $\lambda = 210$  nm,  $t_{R1} = 5.6$  min (minor),  $t_{R2} = 6.9$  min (major), 20 °C, ee = 88%.

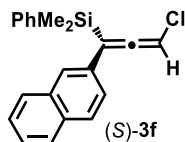

(S)-**3f**: A dried screw-vial seal tube was charged with CuF<sub>2</sub> (2.0 mg, 0.02 mmol, 10 mol %) and ligand **L**<sub>5</sub> (19.5 mg, 0.04 mmol, 20 mol %) in glove box, then moved it out of the glove box. The tube was equipped with an argon balloon, TMP (56.5 mg, 0.4 mmol, 2.0 equiv) and extra dry MeOH (1.0 mL) were added into it. The mixture was stirred for 1 hour at room temperature to form a white solution. Then the tube was cooled to -30 °C, **1f** (47.0 mg, 0.2 mmol, 1.0 equiv) and PhMe<sub>2</sub>Si-Bpin (105 mg, 0.4 mmol, 2.0 equiv) were added in sequence via syringe. It was continued to stir for 15 hours at -30 °C. The tube was opened quickly at room temperature, the final solution was filtered through celite using CH<sub>2</sub>Cl<sub>2</sub> (30 mL) under air. The filtrate was concentrated under reduced pressure to afford the crude product, which was purified by flash column chromatography on silica gel (eluent: PE) to obtain the desired product (S)-**3f** (41.5 mg, 62%) as yellow oil.

[α]<sub>D</sub><sup>20</sup> +151.2° (c = 1.21, CH<sub>2</sub>Cl<sub>2</sub>)

The enantiomeric excess of (S)-**3f** was determined by chiral HPLC analysis on Chiralcel OJ column. Conditions: hexane/isopropanol = 98:2, flow rate = 0.5 mL/min, UV-Vis detection at λ = 273 nm, t<sub>R1</sub> = 13.6 min (minor), t<sub>R2</sub> = 26.4 min (major), 20 °C, ee = 90%.

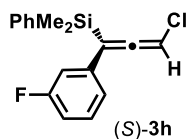

(S)-**3h**: A dried screw-vial seal tube was charged with CuF<sub>2</sub> (2.0 mg, 0.02 mmol, 10 mol %) and ligand **L**<sub>5</sub> (19.5 mg, 0.04 mmol, 20 mol %) in glove box, then moved it out of the glove box. The tube was equipped with an argon balloon, TMP (56.5 mg, 0.4 mmol, 2.0 equiv) and extra dry MeOH (1.0 mL) were added into it. The mixture was stirred for 1 hour at room temperature to form a white solution. Then the tube was cooled to -30 °C, **1h** (40.6 mg, 0.2 mmol, 1.0 equiv) and PhMe<sub>2</sub>Si-Bpin (105 mg, 0.4 mmol, 2.0 equiv) were added in sequence via syringe. It was continued to stir for 10 hours at -30 °C. The tube was opened quickly at room temperature, the final solution was filtered through celite using CH<sub>2</sub>Cl<sub>2</sub> (30 mL) under air. The filtrate was concentrated under reduced pressure to afford the crude product, which was purified by flash column chromatography on silica gel (eluent: PE) to obtain the desired product (S)-**3h** (29 mg, 48%) as yellow oil.

[α]<sub>D</sub><sup>20</sup> +37.7° (c = 1.71, CH<sub>2</sub>Cl<sub>2</sub>)

The enantiomeric excess of (S)-**3h** was determined by chiral HPLC analysis on Chiralcel OD-H column. Conditions: hexane/isopropanol = 100:0, flow rate = 0.6 mL/min, UV-Vis detection at λ = 210 nm, t<sub>R1</sub> = 13.7 min (major), t<sub>R2</sub> = 15.7 min (minor), 20 °C, ee = 86%.

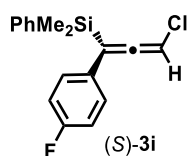

(*S*)-**3i**: A dried screw-vial seal tube was charged with CuF<sub>2</sub> (2.0 mg, 0.02 mmol, 10 mol %) and ligand **L**<sub>5</sub> (19.5 mg, 0.04 mmol, 20 mol %) in glove box, then moved it out of the glove box. The tube was equipped with an argon balloon, TMP (56.5 mg, 0.4 mmol, 2.0 equiv) and extra dry MeOH (1.0 mL) were added into it. The mixture was stirred for 1 hour at room temperature to form a white solution. Then the tube was cooled to -30 °C, **1i** (40.6 mg, 0.2 mmol, 1.0 equiv) and PhMe<sub>2</sub>Si-Bpin (105 mg, 0.4 mmol, 2.0 equiv) were added in sequence via syringe. It was continued to stir for 4 hours at -30 °C. The tube was opened quickly at room temperature, the final solution was filtered through celite using CH<sub>2</sub>Cl<sub>2</sub> (30 mL) under air. The filtrate was concentrated under reduced pressure to afford the crude product, which was purified by flash column chromatography on silica gel (eluent: PE) to obtain the desired product (*S*)-**3i** (33.3 mg, 55%) as yellow oil.

$[\alpha]_{\text{D}}^{20} +216.9^{\circ}$  (c = 1.06, CH<sub>2</sub>Cl<sub>2</sub>)

The enantiomeric excess of (*S*)-**3i** was determined by chiral HPLC analysis on Chiralcel OD-H column. Conditions: hexane/isopropanol = 100:0, flow rate = 0.6 mL/min, UV-Vis detection at  $\lambda = 210$  nm,  $t_{\text{R}1} = 11.3$  min (major),  $t_{\text{R}2} = 13.0$  min (minor), 20 °C, ee = 86%.

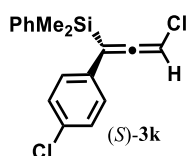

(*S*)-**3k**: A dried screw-vial seal tube was charged with CuF<sub>2</sub> (2.0 mg, 0.02 mmol, 10 mol %) and ligand **L**<sub>5</sub> (19.5 mg, 0.04 mmol, 20 mol %) in glove box, then moved it out of the glove box. The tube was equipped with an argon balloon, TMP (56.5 mg, 0.4 mmol, 2.0 equiv) and extra dry MeOH (1.0 mL) were added into it. The mixture was stirred for 1 hour at room temperature to form a white solution. Then the tube was cooled to -30 °C, **1k** (43.9 mg, 0.2 mmol, 1.0 equiv) and PhMe<sub>2</sub>Si-Bpin (105 mg, 0.4 mmol, 2.0 equiv) were added in sequence via syringe. It was continued to stir for 4 hours at -30 °C. The tube was opened quickly at room temperature, the final solution was filtered through celite using CH<sub>2</sub>Cl<sub>2</sub> (30 mL) under air. The filtrate was concentrated under reduced pressure to afford the crude product, which was purified by flash column chromatography on silica gel (eluent: PE) to obtain the desired product (*S*)-**3k** (42.4 mg, 66%) as yellow oil.

$[\alpha]_{\text{D}}^{20} +256.6^{\circ}$  (c = 1.10, CH<sub>2</sub>Cl<sub>2</sub>)

The enantiomeric excess of (*S*)-**3k** was determined by chiral HPLC analysis on Chiralcel OD-H column. Conditions: hexane/isopropanol = 100:0, flow rate = 0.6 mL/min, UV-Vis detection at  $\lambda = 210$  nm,  $t_{\text{R}1} = 12.5$  min (major),  $t_{\text{R}2} = 14.3$  min (minor), 20 °C, ee = 86%.

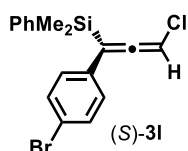

(*S*)-**3l**: A dried screw-vial seal tube was charged with CuF<sub>2</sub> (2.0 mg, 0.02 mmol, 10 mol %) and ligand **L**<sub>5</sub> (19.5 mg, 0.04 mmol, 20 mol %) in glove box, then moved it out of the glove box. The tube was equipped with an argon balloon, TMP (56.5 mg, 0.4 mmol, 2.0 equiv) and extra dry MeOH (1.0 mL) were added into it. The mixture was stirred for 1 hour at room

temperature to form a white solution. Then the tube was cooled to -30 °C, **11** (52.8 mg, 0.2 mmol, 1.0 equiv) and PhMe<sub>2</sub>Si-Bpin (105 mg, 0.4 mmol, 2.0 equiv) were added in sequence *via* syringe. It was continued to stir for 15 hours at -30 °C. The tube was opened quickly at room temperature, the final solution was filtered through celite using CH<sub>2</sub>Cl<sub>2</sub> (30 mL) under air. The filtrate was concentrated under reduced pressure to afford the crude product, which was purified by flash column chromatography on silica gel (eluent: PE) to obtain the desired product (*S*)-**31** (45.3 mg, 62%) as yellow oil.

$[\alpha]_D^{20}$  -54.1° (c = 0.63, CH<sub>2</sub>Cl<sub>2</sub>)

The enantiomeric excess of (*S*)-**31** was determined by chiral HPLC analysis on Chiralcel OJ column. Conditions: hexane/isopropanol = 95:5, flow rate = 0.6 mL/min, UV-Vis detection at  $\lambda$  = 273 nm,  $t_{R1}$  = 6.9 min (minor),  $t_{R2}$  = 9.5 min (major), 20 °C, ee = 84%.

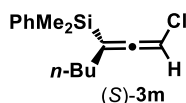

(*S*)-**3m**: A dried screw-vial seal tube was charged with CuF<sub>2</sub> (2.0 mg, 0.02 mmol, 10 mol %) and ligand **L<sub>5</sub>** (19.5 mg, 0.04 mmol, 20 mol %) in glove box, then moved it out of the glove box. The tube was equipped with an argon balloon, TMP (56.5 mg, 0.4 mmol, 2.0 equiv) and extra dry MeOH (1.0 mL) were added into it. The mixture was stirred for 1 hour at room temperature to form a white solution. Then the tube was cooled to -30 °C, **1m** (33.0 mg, 0.2 mmol, 1.0 equiv) and PhMe<sub>2</sub>Si-Bpin (105 mg, 0.4 mmol, 2.0 equiv) were added in sequence *via* syringe. It was continued to stir for 4 hours at -30 °C. The tube was opened quickly at room temperature, the final solution was filtered through celite using CH<sub>2</sub>Cl<sub>2</sub> (30 mL) under air. The filtrate was concentrated under reduced pressure to afford the crude product, which was purified by flash column chromatography on silica gel (eluent: PE) to obtain the desired product (*S*)-**3m** (45.9 mg, 87%) as slightly yellow oil.

$[\alpha]_D^{20}$  -32.9° (c = 0.78, CH<sub>2</sub>Cl<sub>2</sub>)

The enantiomeric excess of (*S*)-**3m** was determined by chiral HPLC analysis on Chiralcel OJ column. Conditions: hexane/isopropanol = 100:0, flow rate = 0.2 mL/min, UV-Vis detection at  $\lambda$  = 210 nm,  $t_{R1}$  = 21.0 min (major),  $t_{R2}$  = 23.0 min (minor), 20 °C, ee = 84%.

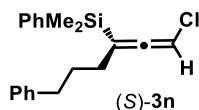

(*S*)-**3n**: A dried screw-vial seal tube was charged with CuF<sub>2</sub> (2.0 mg, 0.02 mmol, 10 mol %) and ligand **L<sub>5</sub>** (19.5 mg, 0.04 mmol, 20 mol %) in glove box, then moved it out of the glove box. The tube was equipped with an argon balloon, TMP (56.5 mg, 0.4 mmol, 2.0 equiv) and extra dry MeOH (1.0 mL) were added into it. The mixture was stirred for 1 hour at room temperature to form a white solution. Then the tube was cooled to -30 °C, **1n** (45.4 mg, 0.2 mmol, 1.0 equiv) and PhMe<sub>2</sub>Si-Bpin (105 mg, 0.4 mmol, 2.0 equiv) were added in sequence *via* syringe. It was continued to stir for 4 hours at -30 °C. The tube was opened quickly at room temperature, the final solution was filtered through celite using CH<sub>2</sub>Cl<sub>2</sub> (30 mL) under air. The filtrate was concentrated under reduced pressure to afford the crude product, which was purified by flash column chromatography on silica gel (eluent: PE/Et<sub>2</sub>O = 98:2) to obtain

the desired product (*S*)-**3n** (57.6 mg, 88%) as colorless oil.

$[\alpha]_{\text{D}}^{20} +6.5^{\circ}$  ( $c = 1.49$ ,  $\text{CH}_2\text{Cl}_2$ )

The enantiomeric excess of (*S*)-**3n** was determined by chiral HPLC analysis on Chiralcel OD-H column. Conditions: hexane/isopropanol = 100:0, flow rate = 0.3 mL/min, UV-Vis detection at  $\lambda = 210$  nm,  $t_{\text{R}1} = 44.1$  min (minor),  $t_{\text{R}2} = 46.5$  min (major), 20 °C, ee = 80%.

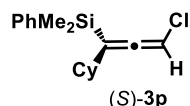

(*S*)-**3p**: A dried screw-vial seal tube was charged with  $\text{CuF}_2$  (2.0 mg, 0.02 mmol, 10 mol %) and ligand **L**<sub>5</sub> (19.5 mg, 0.04 mmol, 20 mol %) in glove box, then moved it out of the glove box. The tube was equipped with an argon balloon, TMP (56.5 mg, 0.4 mmol, 2.0 equiv) and extra dry MeOH (1.0 mL) were added into it. The mixture was stirred for 1 hour at room temperature to form a white solution. Then the tube was cooled to -30 °C, and **1p** (38.2 mg, 0.2 mmol, 1.0 equiv) and PhMe<sub>2</sub>Si-Bpin (105 mg, 0.4 mmol, 2.0 equiv) were added in sequence via syringe. It was continued to stir for 4 hours at -30 °C. The tube was opened quickly at room temperature, the final solution was filtered through celite using  $\text{CH}_2\text{Cl}_2$  (30 mL) under air. The filtrate was concentrated under reduced pressure to afford the crude product, which was purified by flash column chromatography on silica gel (eluent: PE) to obtain the desired product (*S*)-**3p** (51.7 mg, 89%) as slightly yellow oil.

$[\alpha]_{\text{D}}^{20} +17.3^{\circ}$  ( $c = 1.10$ ,  $\text{CH}_2\text{Cl}_2$ )

The enantiomeric excess of (*S*)-**3p** was determined by chiral HPLC analysis on Chiralcel OD-H column. Conditions: hexane/isopropanol = 99:1, flow rate = 0.5 mL/min, UV-Vis detection at  $\lambda = 210$  nm,  $t_{\text{R}1} = 6.5$  min (minor),  $t_{\text{R}2} = 6.9$  min (major), 20 °C, ee = 80%.

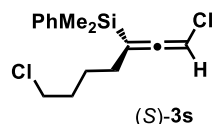

(*S*)-**3s**: A dried screw-vial seal tube was charged with  $\text{CuF}_2$  (2.0 mg, 0.02 mmol, 10 mol %) and ligand **L**<sub>5</sub> (19.5 mg, 0.04 mmol, 20 mol %) in glove box, then moved it out of the glove box. The tube was equipped with an argon balloon, TMP (56.5 mg, 0.4 mmol, 2.0 equiv) and extra dry MeOH (1.0 mL) were added into it. The mixture was stirred for 1 hour at room temperature to form a white solution. Then the tube was cooled to -30 °C, **1s** (39.9 mg, 0.2 mmol, 1.0 equiv) and PhMe<sub>2</sub>Si-Bpin (105 mg, 0.4 mmol, 2.0 equiv) were added in sequence via syringe. It was continued to stir for 4 hours at -30 °C. The tube was opened quickly at room temperature, the final solution was filtered through celite using  $\text{CH}_2\text{Cl}_2$  (30 mL) under air. The filtrate was concentrated under reduced pressure to afford the crude product, which was purified by flash column chromatography on silica gel (eluent: PE/Et<sub>2</sub>O = 98:2) to obtain the desired product (*S*)-**3s** (40.8 mg, 68%) as colorless oil.

$[\alpha]_{\text{D}}^{20} -11.2^{\circ}$  ( $c = 1.35$ ,  $\text{CH}_2\text{Cl}_2$ )

The enantiomeric excess of (*S*)-**3s** was determined by chiral HPLC analysis on Chiralcel OJ column. Conditions: hexane/isopropanol = 95:5, flow rate = 0.7 mL/min, UV-Vis detection at  $\lambda = 210$  nm,  $t_{\text{R}1} = 6.2$  min (minor),  $t_{\text{R}2} = 12.0$  min (major), 20 °C, ee = 83%.

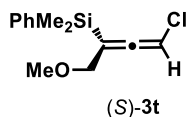

(S)-**3t**: A dried screw-vial seal tube was charged with CuF<sub>2</sub> (2.0 mg, 0.02 mmol, 10 mol %) and ligand **L**<sub>5</sub> (19.5 mg, 0.04 mmol, 20 mol %) in glove box, then moved it out of the glove box. The tube was equipped with an argon balloon, TMP (56.5 mg, 0.4 mmol, 2.0 equiv) and extra dry MeOH (1.0 mL) were added into it. The mixture was stirred for 1 hour at room temperature to form a white solution. Then the tube was cooled to -30 °C, **1t** (30.6 mg, 0.2 mmol, 1.0 equiv) and PhMe<sub>2</sub>Si-Bpin (105 mg, 0.4 mmol, 2.0 equiv) were added in sequence *via* syringe. It was continued to stir for 4 hours at -30 °C. The tube was opened quickly at room temperature, the final solution was filtered through celite using CH<sub>2</sub>Cl<sub>2</sub> (30 mL) under air. The filtrate was concentrated under reduced pressure to afford the crude product, which was purified by flash column chromatography on silica gel (eluent: PE/Et<sub>2</sub>O = 99:1) to obtain the desired product (S)-**3t** (44.5 mg, 88%) as slightly yellow oil.

[α]<sub>D</sub><sup>20</sup> -29.8° (c = 0.99, CH<sub>2</sub>Cl<sub>2</sub>)

The enantiomeric excess of (S)-**3t** was determined by chiral HPLC analysis on Chiralcel OJ column. Conditions: hexane/isopropanol = 95:5, flow rate = 0.7 mL/min, UV-Vis detection at λ = 210 nm, t<sub>R1</sub> = 7.3 min (minor), t<sub>R2</sub> = 8.7 min (major), 20 °C, ee = 70%.

## 6 General Procedures for the One-pot Synthesis of Enantioenriched Disilyl-substituted Allenes.

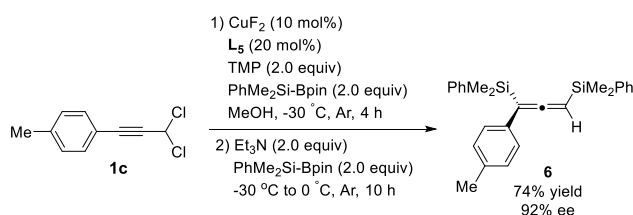

**6**: A dried screw-vial seal tube was charged with CuF<sub>2</sub> (2.0 mg, 0.02 mmol) and ligand **L**<sub>5</sub> (19.5 mg, 0.04 mmol) in glove box, then moved it out of the glove box. The tube was equipped with an argon balloon, TMP (56.5 mg, 0.4 mmol) and dry MeOH (1.0 mL) were added into it. The mixture was stirred for 1 hour at room temperature to form an off-white solution. Then the tube was cooled to -30 °C, **1c** (39.8 mg, 0.2 mmol) and PhMe<sub>2</sub>Si-Bpin (105 mg, 0.4 mmol) were added in sequence *via* syringe. It was continued to stir for 4 hours at -30 °C, the final yellow solution was added dry Et<sub>3</sub>N (40.5 mg, 0.4 mmol). It was continued to stir for 20 minutes at -30 °C, PhMe<sub>2</sub>Si-Bpin (105 mg, 0.4 mmol) was added dropwise *via* syringe. The system was warmed to 0 °C, and stirred 10 hours at this temperature. The tube was opened quickly at room temperature, the final solution was filtered through celite using CH<sub>2</sub>Cl<sub>2</sub> (30 mL) under air. The filtrate was concentrated under reduced pressure to afford the crude product, which was purified by flash column chromatography on silica gel (eluent: PE) to obtain the desired product **6** (59 mg, 74 %) as yellow oil. <sup>1</sup>H NMR (400 MHz, CDCl<sub>3</sub>): δ 7.57 – 7.54 (m, 4H), 7.38 – 7.33 (m, 6H), 7.11 -7.09 (m, 2H), 7.02 – 7.00 (m, 2H), 5.09 (s, 1H), 2.28 (s, 1H), 0.44 (s, 3H), 0.43 (s, 6H), 0.40 (s, 3H). <sup>13</sup>C NMR (100 MHz, CDCl<sub>3</sub>): δ 213.67, 140.40, 140.22, 137.10, 135.88, 135.61, 135.43, 131.03, 130.96, 130.88, 129.66, 129.33, 91.07, 78.04, 22.85, 0.36, 0.26, 0.01, 0.00. HRMS (EI): m/z calculated for

$C_{26}H_{30}Si_2[M]^+$ : 398.1881, found: 398.1894. **IR** (KBr): 2957, 1901, 1508, 1428, 1304, 1251, 1115, 914, 829, 730, 699, 656.

$[\alpha]_D^{20} +54.0^\circ$  ( $c = 0.80$ ,  $CH_2Cl_2$ )

The enantiomeric excess of **6** was determined by chiral HPLC analysis on Chiralcel OJ column. Conditions: hexane/isopropanol = 97:3, flow rate = 0.1 mL/min, UV-Vis detection at  $\lambda = 214$  nm,  $t_{R1} = 33.7$  min (major),  $t_{R2} = 47.1$  min (minor), 20 °C, ee = 92%.

## 7 Further Transformations of Silyl-substituted Chloroallenes.

### 7.1 General Procedure for Sonogashira Coupling Reaction.

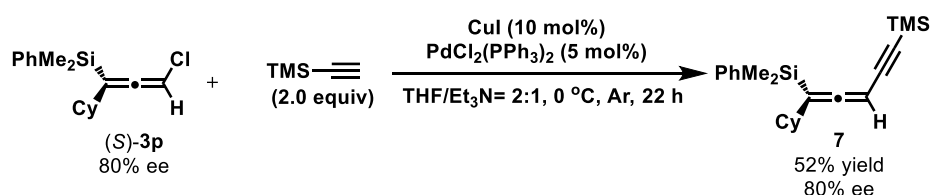

**7**: A dried screw-vial seal tube was charged with CuI (3.8 mg, 0.02 mmol, 10 mol %) and PdCl<sub>2</sub>(PPh<sub>3</sub>)<sub>2</sub> (7.0 mg, 0.01 mmol, 5 mol %) in glove box, then moved it out of the glove box. The tube was equipped with an argon balloon, (S)-**3p** (58.2mg, 0.2 mmol, 1.0 equiv), a dried and degassed mixture of THF (2.0 mL) and Et<sub>3</sub>N (1.0 mL) were added into it. The atmosphere of the tube was displaced by argon for 20 minutes, then it was cooled to 0 °C for 10 minutes, trimethylsilylacetylene (39.3 mg, 0.4 mmol, 2.0 equiv) was introduced dropwise via syringe. The reaction mixture was stirred for 22 hours at 0 °C under dark environment. The tube was opened quickly at room temperature, the final black solution was filtered through celite using CH<sub>2</sub>Cl<sub>2</sub> (30 mL) under air. The filtrate was concentrated under reduced pressure to afford the crude product, which was purified by flash column chromatography on silica gel (eluent: PE) to obtain the desired product **7** (36.7 mg, 52%) as brown oil. **<sup>1</sup>H NMR (400 MHz, CDCl<sub>3</sub>)**:  $\delta$  7.56 – 7.53 (m, 2H), 7.37 – 7.33 (m, 3H), 5.14 (d,  $J = 1.9$  Hz, 1H), 1.87 – 1.83 (m, 1H), 1.72 – 1.66 (m, 4H), 1.58 – 1.56 (m, 1H), 1.19 – 1.10 (m, 5H), 0.42 (s, 3H), 0.41 (s, 3H), 0.19. **<sup>13</sup>C NMR (100 MHz, CDCl<sub>3</sub>)**:  $\delta$  212.52, 137.64, 133.71, 129.06, 127.62, 103.30, 99.38, 94.01, 71.50, 38.99, 33.63, 33.60, 26.35, 26.30, 25.81, 0.00, -2.46, -2.79. **HRMS (EI)**:  $m/z$  calculated for  $C_{22}H_{32}Si_2[M]^+$ : 352.2037, found: 352.2036. **IR** (KBr): 3069, 2927, 2852, 2153, 1913, 1428, 1370, 1112, 1062, 999, 842, 733, 700.

$[\alpha]_D^{20} +2560.0^\circ$  ( $c = 0.20$ ,  $CH_2Cl_2$ )

The enantiomeric excess of **7** was determined by chiral HPLC analysis on Chiralcel OD-H&OD-H column. Conditions: hexane/isopropanol = 100:0, flow rate = 0.2 mL/min, UV-Vis detection at  $\lambda = 260$  nm,  $t_{R1} = 48.3$  min (major),  $t_{R2} = 50.1$  min (minor), 20 °C, ee = 80%.

### 7.2 General Procedure for Kumada Reaction.<sup>4</sup>



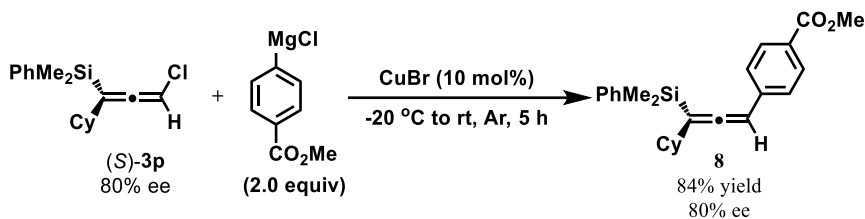

**8:** An oven-dried, argon-flushed Schlenk tube equipped with a magnetic stirring bar and a septum was charged with methyl 4-iodobenzoate (157.2 mg, 0.6 mmol) in THF (0.6 mL). *i*-PrMgCl LiCl (0.49 mL, 0.64 mmol, 1.3 M in THF) was added at -20 °C and the mixture was stirred for 1 hour at this temperature. The CuBr (2.8 mg, 0.02 mmol, 10 mol%) and (S)-3p (58.2 mg, 0.2 mmol) were added quickly under argon atmosphere. The reaction mixture was stirred at room temperature (20 °C) until (S)-3p was consumed completely (TLC). The solution was diluted with DCM (10 mL), then poured into an ice-cooled saturated aqueous NH<sub>4</sub>Cl solution (15 mL). After extraction with DCM (3 x 20 mL), the organic layers were dried (Na<sub>2</sub>SO<sub>4</sub>), filtered, and concentrated *in vacuo*. Product **8** was purified as yellow oil (65.7 mg, 84%) by flash column chromatography on silica gel (eluent: distilled PE/Et<sub>2</sub>O = 100:0 ~ 96:4). **<sup>1</sup>H NMR (400 MHz, CDCl<sub>3</sub>):** δ 7.93 (d, *J* = 8.3 Hz, 2H), 7.60 – 7.50 (m, 2H), 7.38 – 7.31 (m, 3H), 7.27 (d, *J* = 8.3 Hz, 2H), 5.98 (s, 1H), 3.89 (s, 3H), 1.98 – 1.93 (m, 1H), 1.80 – 1.73 (m, 2H), 1.67 – 1.63 (m, 2H), 1.60 – 1.54 (m, 1H), 1.21 – 1.07 (m, 5H), 0.42 (s, 3H), 0.40 (s, 3H). **<sup>13</sup>C NMR (100 MHz, CDCl<sub>3</sub>):** δ 209.39, 169.46, 143.96, 140.18, 136.18, 132.39, 131.67, 130.23, 129.76, 127.82, 108.76, 93.40, 54.35, 42.03, 36.89, 36.52, 28.97, 28.36, 0.00, -0.03. **HRMS (ED):** *m/z* calculated for C<sub>25</sub>H<sub>30</sub>O<sub>2</sub>Si [M]<sup>+</sup>: 390.2015, found: 390.2018. **IR (KBr):** 3069, 2925, 2851, 1911, 1720, 1605, 1434, 1276, 1173, 1111, 1017, 974, 817, 734, 699.  $[\alpha]_D^{20} +801.1^\circ$  (*c* = 0.80, CH<sub>2</sub>Cl<sub>2</sub>)

The enantiomeric excess of **8** was determined by chiral HPLC analysis on Chiralcel OD-H column. Conditions: hexane/isopropanol = 98:2, flow rate = 0.6 mL/min, UV-Vis detection at λ = 260 nm, *t*<sub>R1</sub> = 7.2 min (major), *t*<sub>R2</sub> = 7.8 min (minor), 20 °C, ee = 80%.

### 7.3 General Procedure for Suzuki Coupling Reaction.

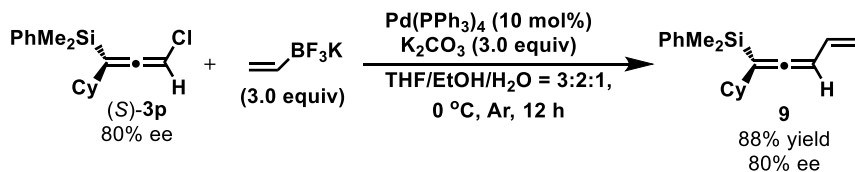

**9:** A dried argon-flushed Schlenk tube was charged with K<sub>2</sub>CO<sub>3</sub> (83 mg, 0.6 mmol, 3.0 equiv), potassium vinyltrifluoroborate (107.2 mg, 0.6 mmol, 3.0 equiv) and Pd(PPh<sub>3</sub>)<sub>4</sub> (23.1 mg, 0.02 mmol, 10 mol %) under Ar. Then a degassed mixture of THF (1.2 mL), EtOH (0.8 mL) and H<sub>2</sub>O (0.4 mL) was added into it under Ar. The tube was cooled to 0 °C for 5 minutes, (S)-3p (58.2 mg, 0.2 mmol, 1.0 equiv) was introduced under Ar. The Schlenk tube was sealed and the reaction mixture was stirred at 0 °C for 12 hours under dark environment. The final black solution was quenched by water (5 mL) and the aqueous phase was extracted with CH<sub>2</sub>Cl<sub>2</sub> (3 x 15 mL). The combined organic phases were dried over Na<sub>2</sub>SO<sub>4</sub>, concentrated under reduced pressure, and purified by flash column chromatography on silica gel (eluent: PE). Product **9** was obtained as yellow oil (49.7 mg, 88%). **<sup>1</sup>H NMR (400 MHz, CDCl<sub>3</sub>):** δ 7.54 – 7.52 (m,

2H), 7.36 – 7.33 (m, 3H), 6.21 – 6.12 (m, 1H), 5.67 (d,  $J = 10.3$  Hz, 1H), 5.09 (d,  $J = 17.0$  Hz, 1H), 4.82 (d,  $J = 10.1$  Hz, 1H), 1.83 – 1.79 (m, 1H), 1.68 – 1.64 (m, 4H), 1.58 (s, 1H), 1.17 – 1.07 (m, 5H), 0.37 (s, 6H).  $^{13}\text{C}$  NMR (100 MHz,  $\text{CDCl}_3$ ):  $\delta$  211.41, 140.75, 136.46, 136.17, 131.41, 130.09, 114.81, 105.28, 93.75, 41.33, 36.51, 36.33, 28.96, 28.94, 28.40, 0.00, -0.05. **HRMS (EI)**:  $m/z$  calculated for  $\text{C}_{19}\text{H}_{26}\text{Si}$   $[\text{M}]^+$ : 282.1798, found: 282.1810. **IR** (KBr): 3069, 2925, 2852, 1913, 1612, 1448, 1428, 1248, 1112, 1028, 986, 888, 851, 818, 774, 731, 699, 650.

$[\alpha]_{\text{D}}^{20}$  -113.6° ( $c = 1.00$ ,  $\text{CH}_2\text{Cl}_2$ )

The enantiomeric excess of **9** was determined by chiral HPLC analysis on Chiralcel OJ-H&OJ column. Conditions: hexane/isopropanol = 98:2, flow rate = 0.5 mL/min, UV-Vis detection at  $\lambda = 260$  nm,  $t_{\text{R}1} = 16.1$  min (major),  $t_{\text{R}2} = 16.8$  min (minor), 20 °C, ee = 80%.

#### 7.4 Copper-catalyzed Derivation Reactions of Chloroallenes.<sup>5</sup>

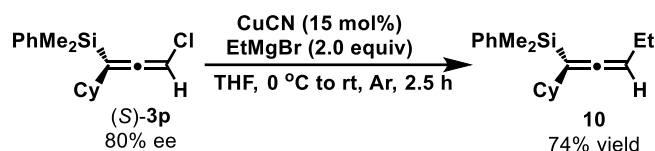

**10**: A dried screw-vial seal tube was charged with CuCN (1.4 mg, 0.015 mmol, 15 mol %) in glove box, then moved it out of the glove box. The tube was equipped with an argon balloon, (*S*)-**3p** (29.1 mg, 0.1 mmol, 1.0 equiv) and dry THF (1.0 mL) were added into it. It was cooled to 0 °C for further 5 minutes, the Ethylmagnesiumbromide (3.0 M in Et<sub>2</sub>O, 67 μL, 0.2 mmol, 2.0 equiv) was added dropwise *via* syringe. The reaction mixture was allowed to warm back to room temperature and stir for 2.5 hours. The reaction mixture was quenched by saturated aqueous NH<sub>4</sub>Cl solution and the aqueous phase was extracted with Et<sub>2</sub>O (3 x 15 mL). The combined organic phases were dried over Na<sub>2</sub>SO<sub>4</sub>, concentrated under reduced pressure, and purified by flash column chromatography on silica gel (eluent: PE/Et<sub>2</sub>O = 99.5:0.5). Product **10** was obtained as colorless oil (21.1 mg, 74%).  $^1\text{H}$  NMR (400 MHz,  $\text{CDCl}_3$ ):  $\delta$  7.54 – 7.52 (m, 2H), 7.35 – 7.32 (m, 3H), 4.95 (td,  $J_1 = 6.0$  Hz,  $J_2 = 1.6$  Hz, 1H), 2.00 – 1.93 (m, 2H), 1.78 – 1.73 (m, 1H), 1.66 – 1.64 (m, 4H), 1.59 – 1.57 (m, 1H), 1.17 – 1.06 (m, 5H), 0.98 (t,  $J = 7.4$  Hz, 3H), 0.34 (s, 6H).  $^{13}\text{C}$  NMR (100 MHz,  $\text{CDCl}_3$ ):  $\delta$  208.61, 141.41, 136.14, 131.07, 129.87, 104.02, 91.04, 40.85, 36.46, 36.25, 28.99, 28.97, 28.43, 23.80, 16.10, 0.00, -0.01. **HRMS (EI)**:  $m/z$  calculated for  $\text{C}_{19}\text{H}_{28}\text{Si}$   $[\text{M}]^+$ : 284.1955, found: 284.1953. **IR** (KBr): 2925, 2853, 1913, 1448, 1260, 1112, 1023, 888, 818, 776, 732, 700.

The product **10** can't be separated by HPLC, the subsequent TiCl<sub>4</sub>-mediated addition of **10** to aldehyde afforded the homopropargylic alcohol. At beginning, we tried the 4-methylbenzaldehyde and isobutyraldehyde to react with the racemic allenylsilane **10** in the presence of different Lewis acids. Finally, it was found that only TiCl<sub>4</sub> could afford the desired products with excellent dr ratios albeit in low yields. Therefore, we consider that a highly reactive reactant possibly could favor a better yield of the desired product *via* a rapid nucleophilic addition process. Then the pentafluorobenzaldehyde was tested to react with the racemic allenylsilane **10** and enantioenriched allenylsilane **10** respectively. In both cases, the desired products were obtained in good yields and with excellent distereoselectivities. And

the chirality of the enantioenriched allenylsilane **10** was also well transformed during the synthesis of homoallylic alcohol product **11**. The detailed results are shown as below:

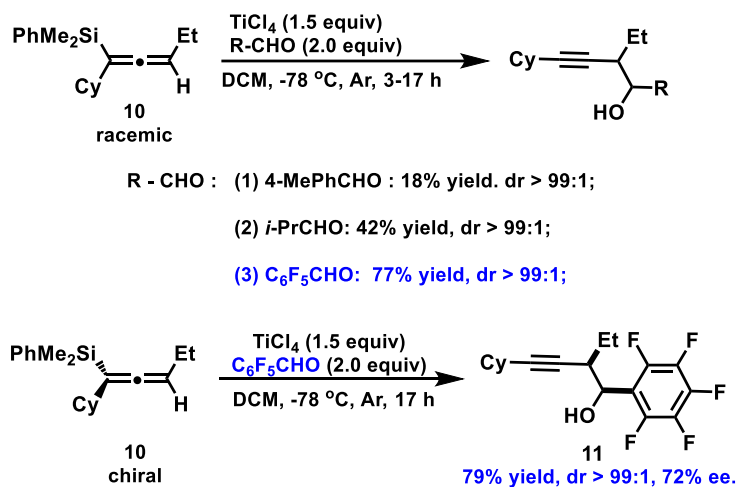

**11:** A dried argon-flushed Schlenk tube was charged with **10** (42.7 mg, 0.15 mmol), 2,3,4,5,6-pentafluorobenzaldehyde (58.8 mg, 0.3 mmol). It was added dry DCM (0.5 mL) and cooled to -78 °C for further 5 minutes, TiCl<sub>4</sub> solution (43.1 mg, dissolved in 0.2 mL dry DCM) was added dropwise at -78 °C, the mixture was stirred for 17 hours at this temperature. Then the solution was diluted with EA and quenched by 2N HCl aq., After stirring at room temperature for 10 minutes, the mixture was neutralized to pH = 7 with NaHCO<sub>3</sub> aq., the organic layer was separated. The aqueous layer was extracted with EA (3 x 20 mL), the combined organic phases were dried over Na<sub>2</sub>SO<sub>4</sub>, concentrated under reduced pressure, and purified by flash column chromatography on silica gel (eluent: PE/EA = 90:10). Product **11** was obtained as yellow oil (41.0 mg, 79%). <sup>1</sup>H NMR (400 MHz, CDCl<sub>3</sub>): δ 4.91 (dd, *J*<sub>1</sub> = 8.0 Hz, *J*<sub>2</sub> = 8.0 Hz, 1H), 2.85 (dt, *J*<sub>1</sub> = 8.0 Hz, *J*<sub>2</sub> = 1.2 Hz, 1H), 2.82 – 2.76 (m, 1H), 2.43 – 2.36 (m, 1H), 1.85 – 1.78 (m, 2H), 1.73 – 1.64 (m, 2H), 1.54 – 1.40 (m, 5H), 1.35 – 1.28 (m, 3H), 1.03 (t, *J* = 8.0 Hz, 3H). <sup>19</sup>F NMR (376 MHz, CDCl<sub>3</sub>): -142.38 – -142.46 (m, 1F), -154.88 – -154.99 (m, 2F), -161.97 – -162.11 (m, 2F). <sup>13</sup>C NMR (100 MHz, CDCl<sub>3</sub>): δ 146.27 – 146.04 (m), 143.84 – 143.56 (m), 142.12 – 141.66 (m), 138.94 – 138.58 (m), 136.45 – 136.08 (m), 115.50 – 115.18 (m), 90.56, 77.32, 69.06, 41.61, 32.84, 29.08, 25.82, 25.01, 24.86, 11.69. **HRMS (EI):** *m/z* calculated for C<sub>18</sub>H<sub>19</sub>F<sub>5</sub>O [M]<sup>+</sup>: 346.1356, found: 346.1359. **IR (KBr):** 2955, 2911, 2875, 1892, 1428, 1249, 1112, 1089, 1015, 896, 839, 806, 730, 699.  $[\alpha]_D^{20} +3.0^\circ$  (c = 1.23, CH<sub>2</sub>Cl<sub>2</sub>)

The enantiomeric excess of **11** was determined by chiral HPLC analysis on Chiralcel OJ column. Conditions: hexane/isopropanol = 99:1, flow rate = 0.5 mL/min, UV-Vis detection at λ = 220 nm, *t*<sub>R1</sub> = 7.3 min (major), *t*<sub>R2</sub> = 7.9 min (minor), 20 °C, ee = 72%.

## 8 Gram-scaled Synthesis of Racemic Silyl-substituted Allenes.

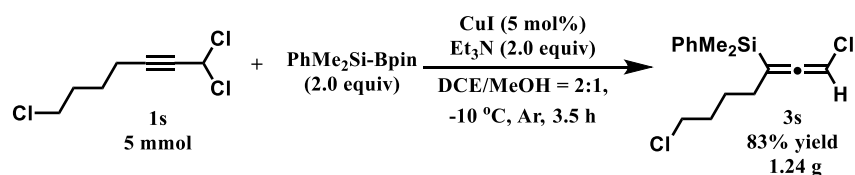

A dried screw-vial flask was charged with CuI (47.5 mg, 0.25 mmol) in glove box, then

moved it out of the glove box. The flask was equipped with an argon balloon, dry Et<sub>3</sub>N (1.0 g, 10.0 mmol), dry DCE (25.0 mL) and dry MeOH (12.5 mL) were added into it. The mixture was stirred for 1 hour at room temperature to form a white suspension. Then the flask was cooled to -10 °C, **1s** (1.0 g, 5.0 mmol) and PhMe<sub>2</sub>Si-Bpin (2.63 g, 10.0 mmol) were added in sequence via syringe. It was continued to stir for 3.5 hours at -10 °C. The flask was opened quickly at room temperature, the final solution was filtered through celite using CH<sub>2</sub>Cl<sub>2</sub> (30 mL) under air. The filtrate was concentrated under reduced pressure to afford the crude product, which was purified by flash column chromatography on silica gel (eluent: PE) to obtain the desired product **3s** (1.24 g, 83%) as pale yellow oil.

### 9 Determination of the Absolute Configuration of Compound (*S*)-**3p**.

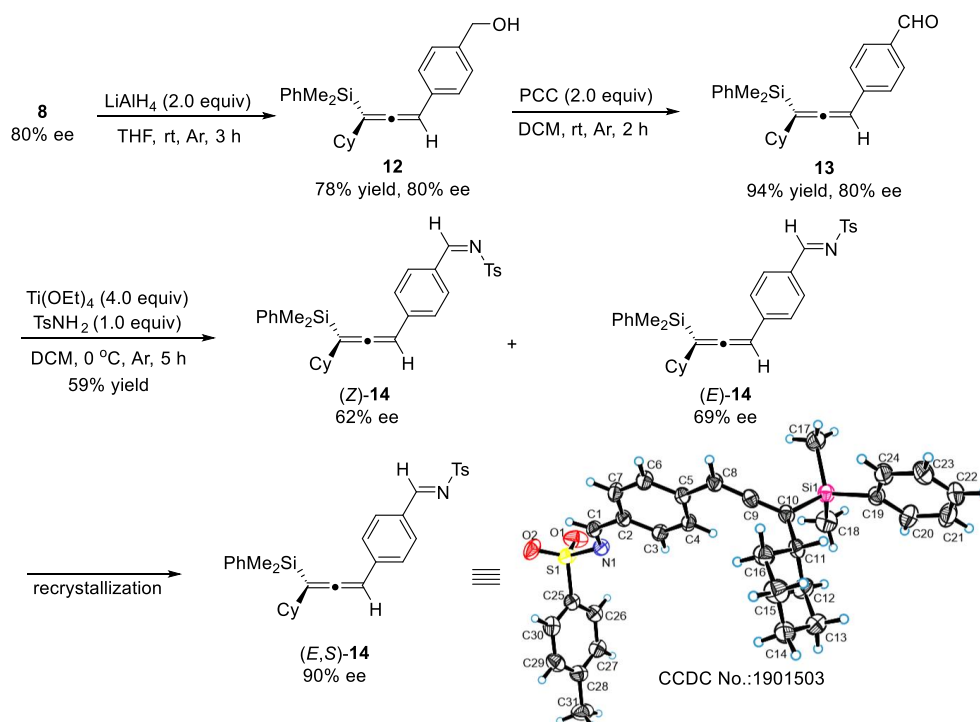

**Step 1:** In an oven-dried 35 mL screw-vial seal tube equipped with a stirring bar, **8** (78.1 mg, 0.2 mmol) was dissolved in 2 mL of dry THF under argon atmosphere. The solution was added LiAlH<sub>4</sub> (15.2 mg, 0.4 mmol) in four batches at 20 °C. The final solution was continued to stir for 3 hours at room temperature (20 °C). Then the reaction was quenched with water and excess amount of saturated potassium sodium tartrate was introduced, and the solution was stirred for 1 hour at room temperature (20 °C). The final solution was extracted with ethyl acetate (4 x 15 mL), and the combined organic layers were washed with saturated brine (5 mL) and dried over anhydrous Na<sub>2</sub>SO<sub>4</sub>. The filtrate was concentrated under vacuum to afford the crude product which was purified through flash column chromatography (Eluent: PE/EA = 90:10) to furnish the related product **12** (56.6 mg, 78%, 80% ee) as yellow oil.

**Step 2:** A dried screw-vial seal tube equipped with an argon balloon, **12** (72.5 mg, 0.2 mmol) and dry DCM (1.0 mL) were introduced. PCC (86.2 mg, 0.4 mmol) was added into it, the mixture was continued to stir for 2 hours at 25 °C. Then the final solution was filtered through celite using CH<sub>2</sub>Cl<sub>2</sub> (30 mL) and the solvent was evaporated under reduced pressure to afford the crude product, which was purified by flash column chromatography on silica gel (eluent:

PE/EA = 90:10) to obtain the desired product **13** (67.5 mg, 94%, 80% ee) as yellow oil.

**Step 3:**<sup>6</sup> A dried screw-vial seal tube equipped with an argon balloon was charged with 4-methylbenzenesulfonamide (59.9 mg, 0.35 mmol), **13** (126.3 mg, 0.35 mmol, dissolved in 1.8 mL dry DCM). It was cooled to 0 °C for further 10 minutes, Ti(OEt)<sub>4</sub> (319.4 mg, 1.4 mmol) was added dropwise via syringe. The tube was stirred for 5 hours at this temperature and monitored by TLC. The reaction mixture was quenched at 0 °C by addition of H<sub>2</sub>O (6 mL), the turbid solution was filtered through celite, and the filter cake was washed with DCM (50 mL). The filtrate was concentrated under reduced pressure to afford the crude product, which was purified by flash column chromatography on silica gel (eluent: PE/EA = 90:10) to obtain the mixture of desired product (*Z*)-**14** (62% ee) and (*E*)-**14** (69% ee) as yellow solid (106.1 mg, 59%). After several recrystallization in mixed solvent (DCM/ PE = 1:1) at 5 °C, the single product (*E*)-**14** was obtained as white solid (90% ee). Finally, single-crystal X-ray diffraction analysis produced the molecular structure of (*E*)-**14** with (*S*)-configuration (CCDC No.:1901503). <sup>1</sup>H NMR (400 MHz, CDCl<sub>3</sub>): δ 8.96 (s, 1H), 7.88 (d, *J* = 7.9 Hz, 2H), 7.81 (d, *J* = 7.9 Hz, 2H), 7.53 (d, *J* = 6.6 Hz, 2H), 7.36 – 7.25 (m, 7H), 5.98 (s, 1H), 2.42 (s, 3H), 2.00 – 1.91 (m, 1H), 1.79 – 1.73 (m, 2H), 1.69 – 1.62 (m, 2H), 1.59 – 1.56 (m, 1H), 1.22 – 1.09 (m, 5H), 0.42 (s, 3H), 0.40 (s, 3H). <sup>13</sup>C NMR (100 MHz, CDCl<sub>3</sub>): δ 209.60, 172.01, 146.90, 146.76, 139.88, 138.07, 136.16, 134.36, 132.29, 132.18, 131.83, 130.39, 130.31, 128.52, 109.09, 93.63, 42.15, 36.95, 36.59, 28.96, 28.35, 24.10, 0.00, -0.03. HRMS (ESI): *m/z* Calcd. for C<sub>31</sub>H<sub>35</sub>NO<sub>2</sub>SSiNa [M+Na]<sup>+</sup>: 536.2055, found: 536.2058. IR (KBr): 2955, 2910, 2875, 1892, 1428, 1249, 1112, 896, 839, 806, 730, 699.

[α]<sub>D</sub><sup>20</sup> +80.6° (c = 0.46, CH<sub>2</sub>Cl<sub>2</sub>)

The enantiomeric excess of (*E, S*)-**14** was determined by chiral HPLC analysis on Chiralcel Chiralpak ID column. Conditions: hexane/isopropanol = 90:10, flow rate = 0.6 mL/min, UV-Vis detection at λ = 210 nm, t<sub>R1</sub> = 41.0 min (minor), t<sub>R2</sub> = 42.8 min (major), 20 °C, ee = 90%.

## 10 References

- (1) Li, H.-L.; Müller, D.; Guénée, L.; Alexakis, A. *Org. Lett.* **2012**, *14*, 5880–5883.
- (2) Belot, S.; Vogt, K. A.; Besnard, C.; Krause, N.; Alexakis, A. *Angew. Chem. Int. Ed.* **2009**, *48*, 8923–8926.
- (3) Hack, D.; Pankaj, C.; Deckers, K.; Mizutani, Y.; Raabe, G.; Enders, D. *Chem. Commun.* **2015**, *51*, 2266–2269.
- (4) Schade, M. A.; Yamada, S.; Knochel, P. *Chem. Eur. J.* **2011**, *17*, 4232–4237.
- (5) Ohmiya, H.; Ito, H.; Sawamura, M. *Org. Lett.* **2009**, *11*, 5618–5620.
- (6) Davis, F. A.; Zhang, Y.; Andemichael, Y.; Fang, T.; Fanelli, D. L.; Zhang, H. *J. Org. Chem.* **1999**, *64*, 1403–1406.

11 <sup>1</sup>H NMR, <sup>19</sup>F NMR, <sup>13</sup>C NMR and HPLC Spectra of the Substrates and Products.

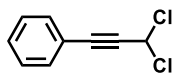

1a

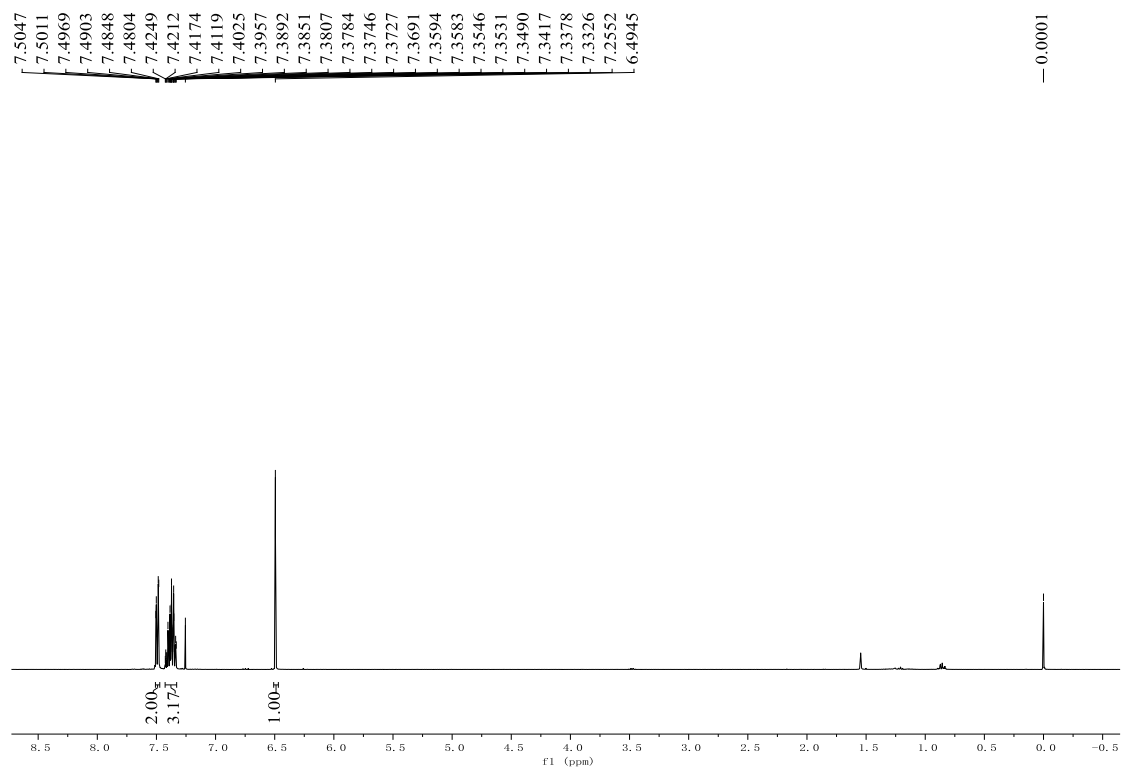

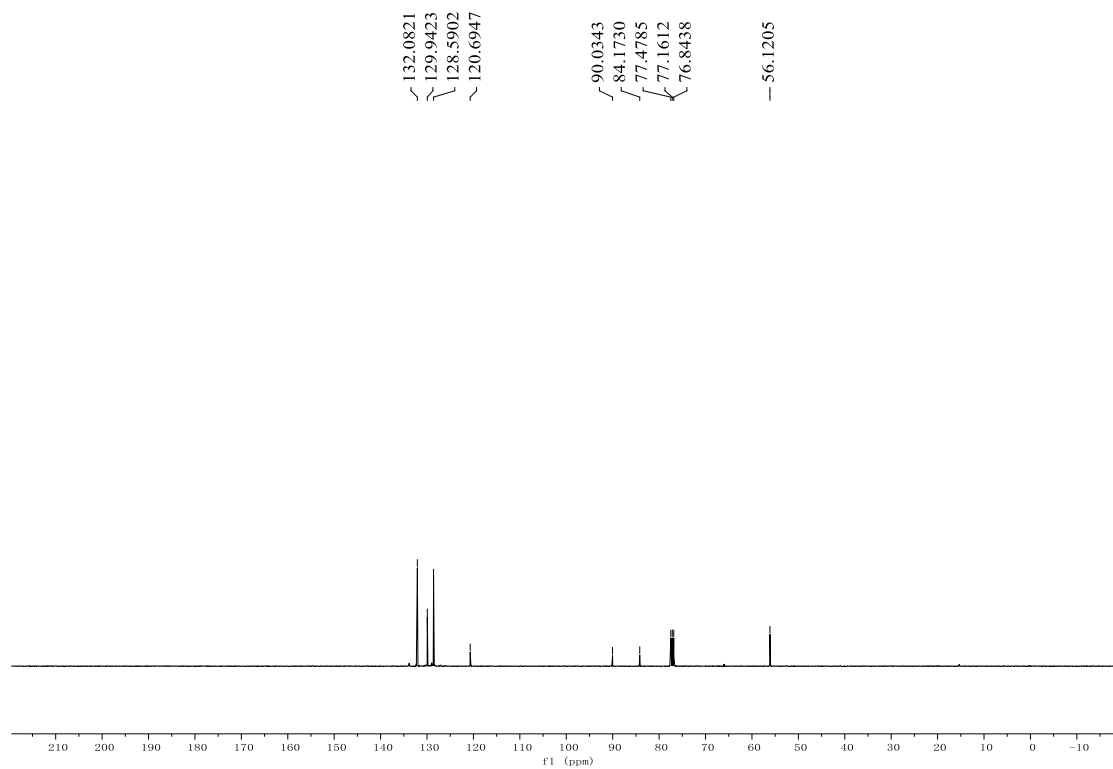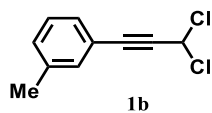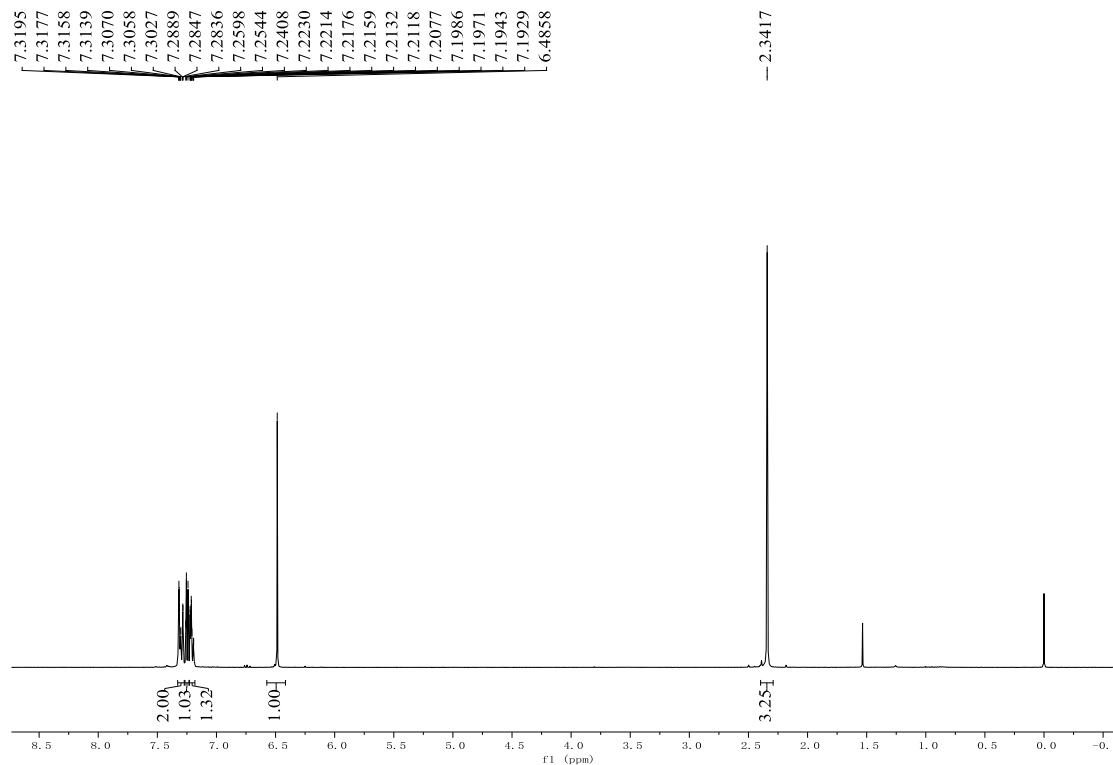

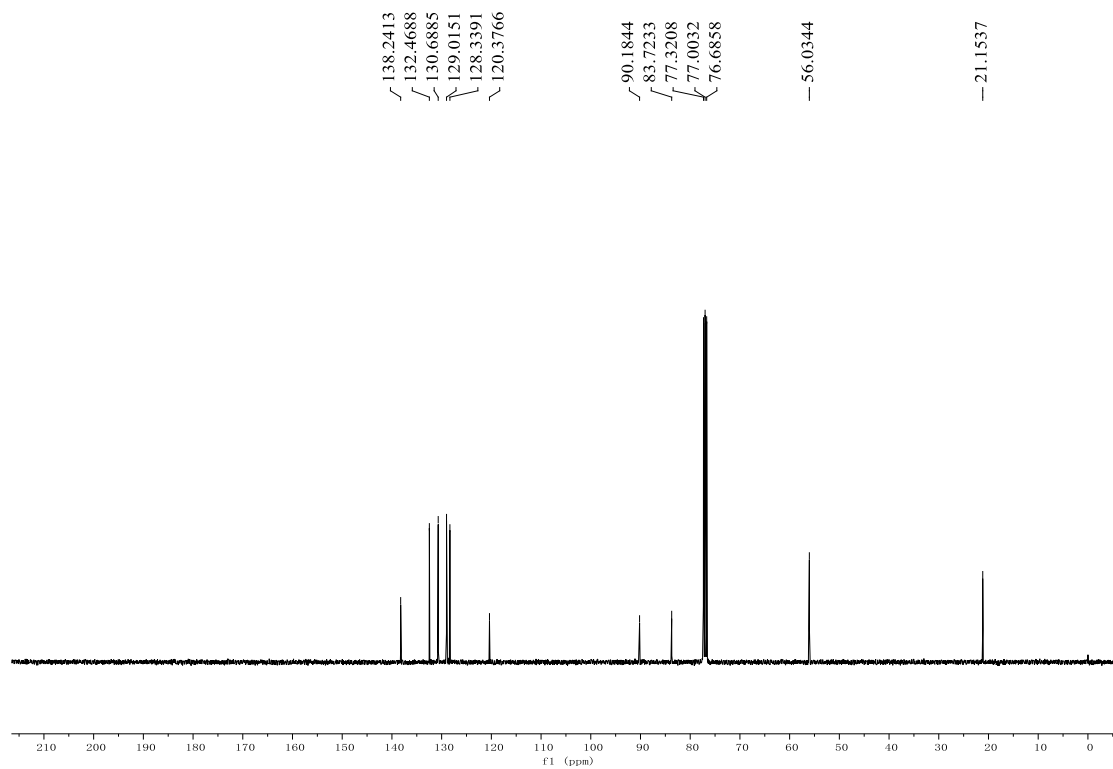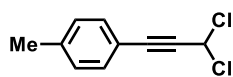

1c

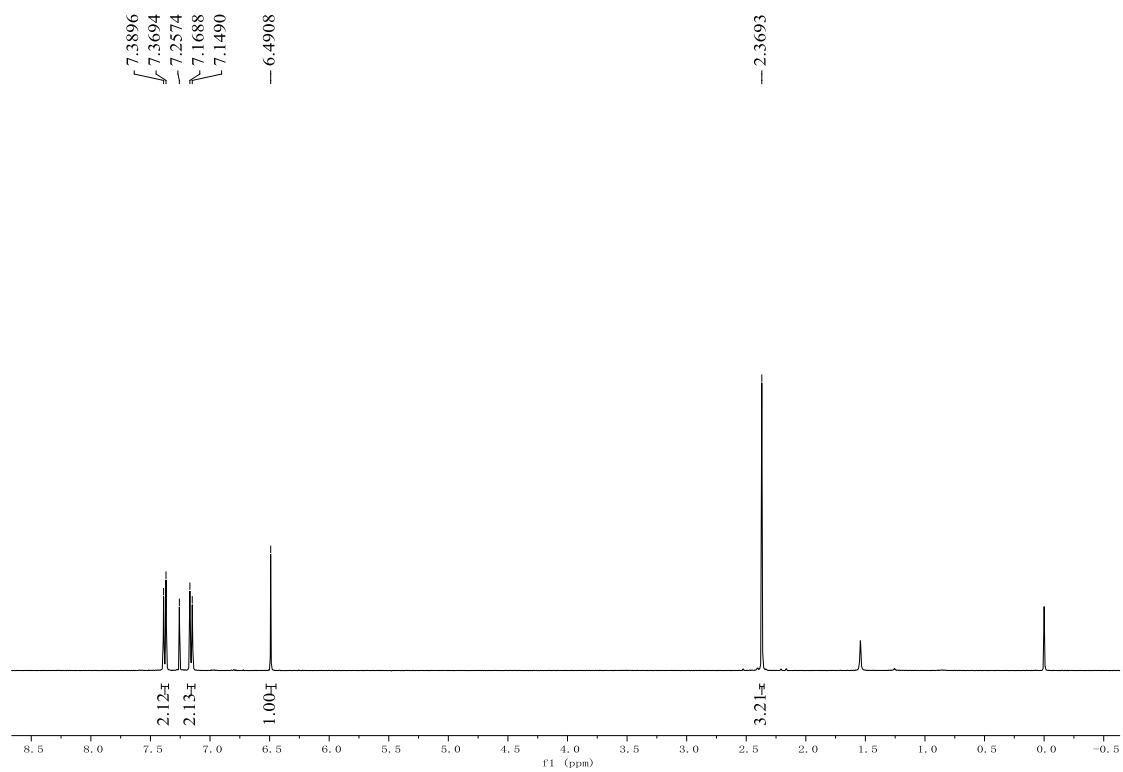



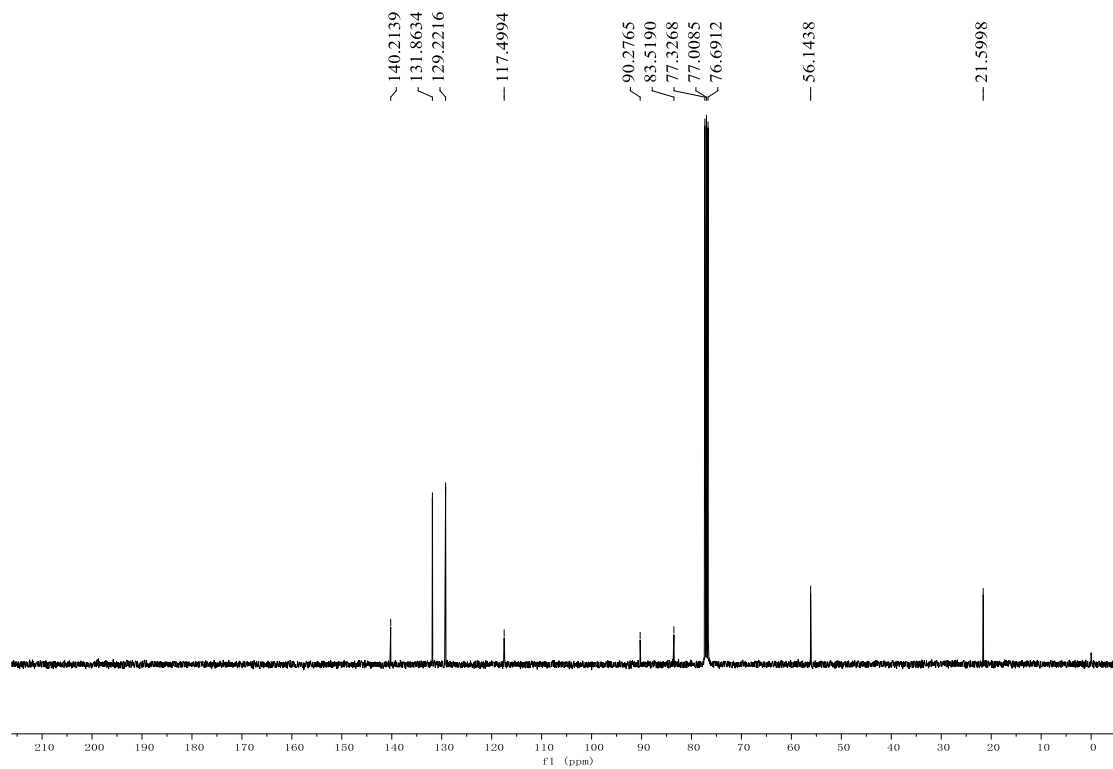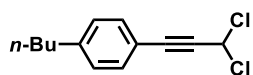

**1d**

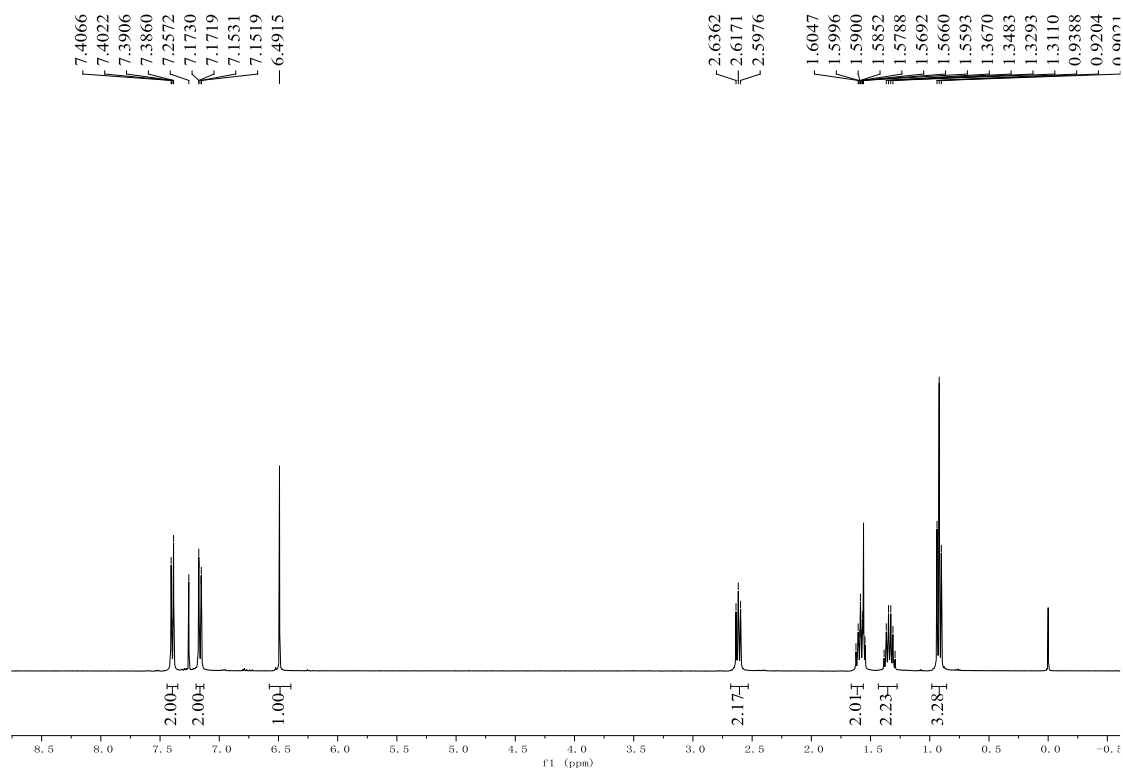

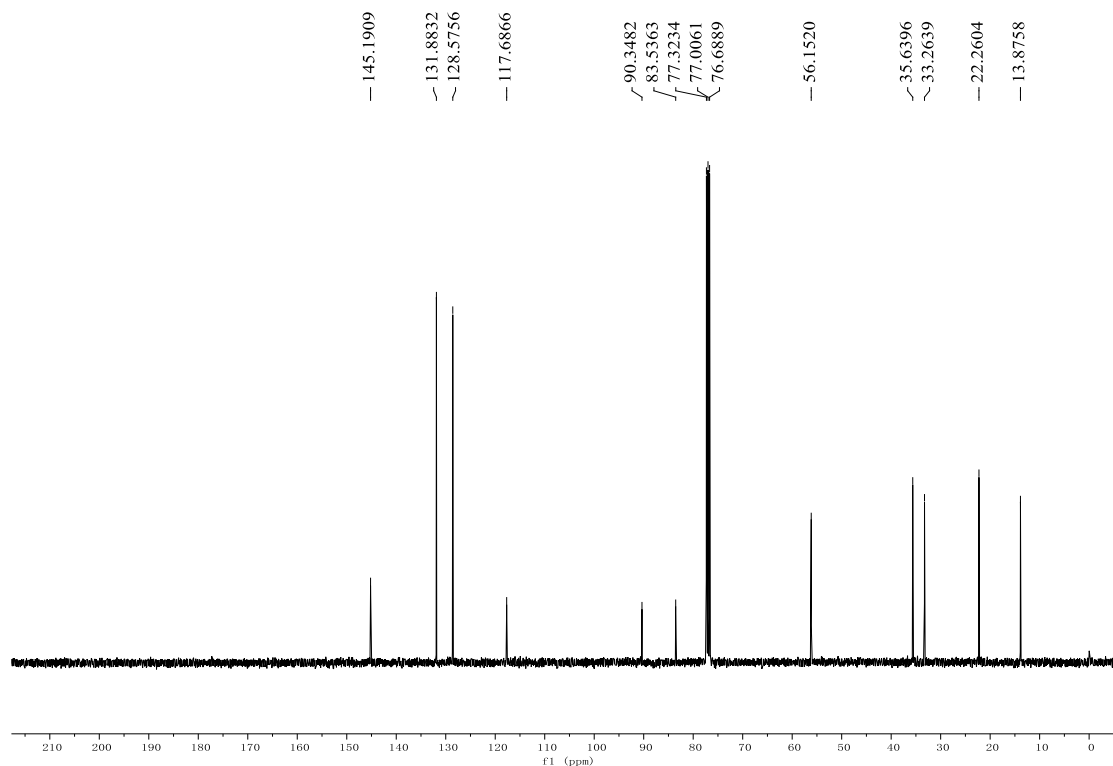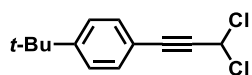

1e

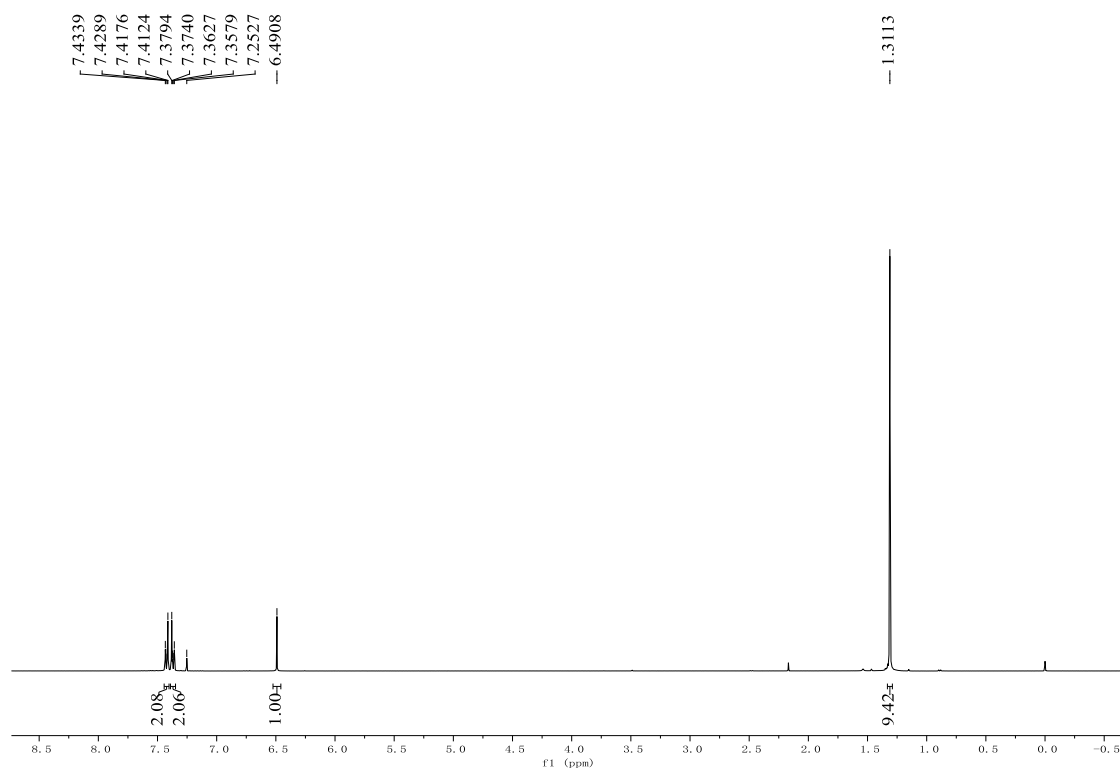

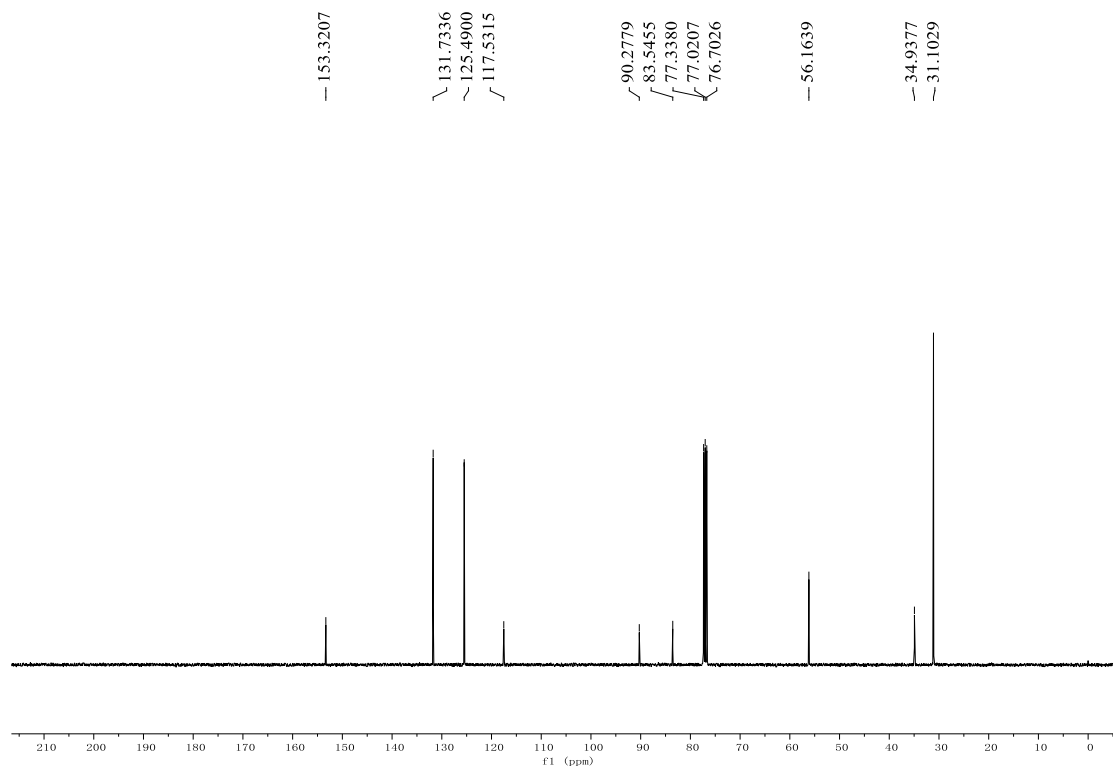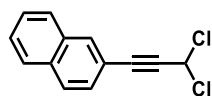

1f

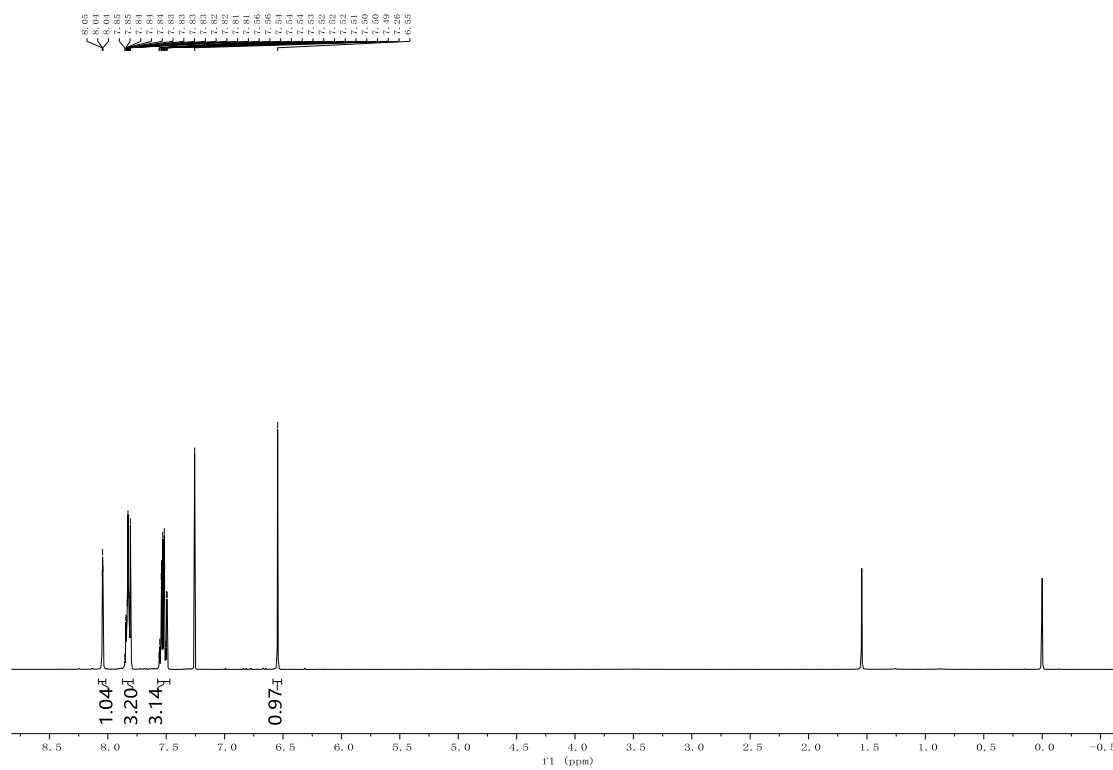

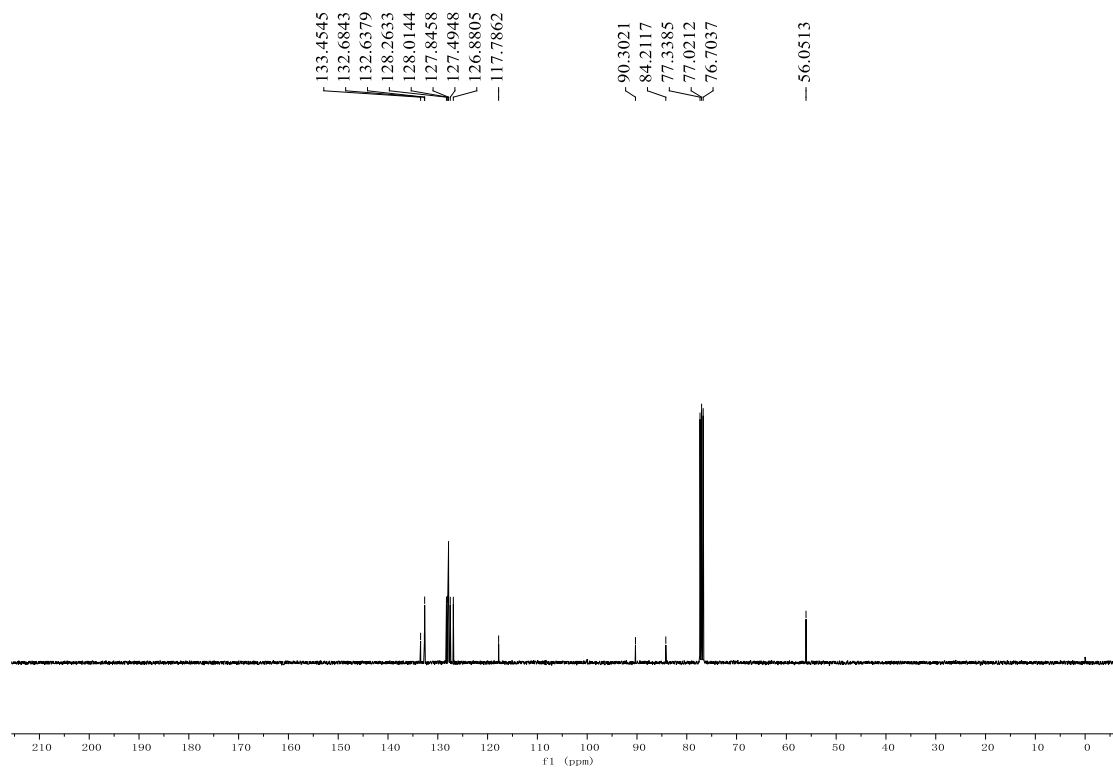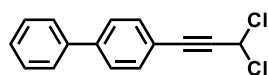

1g

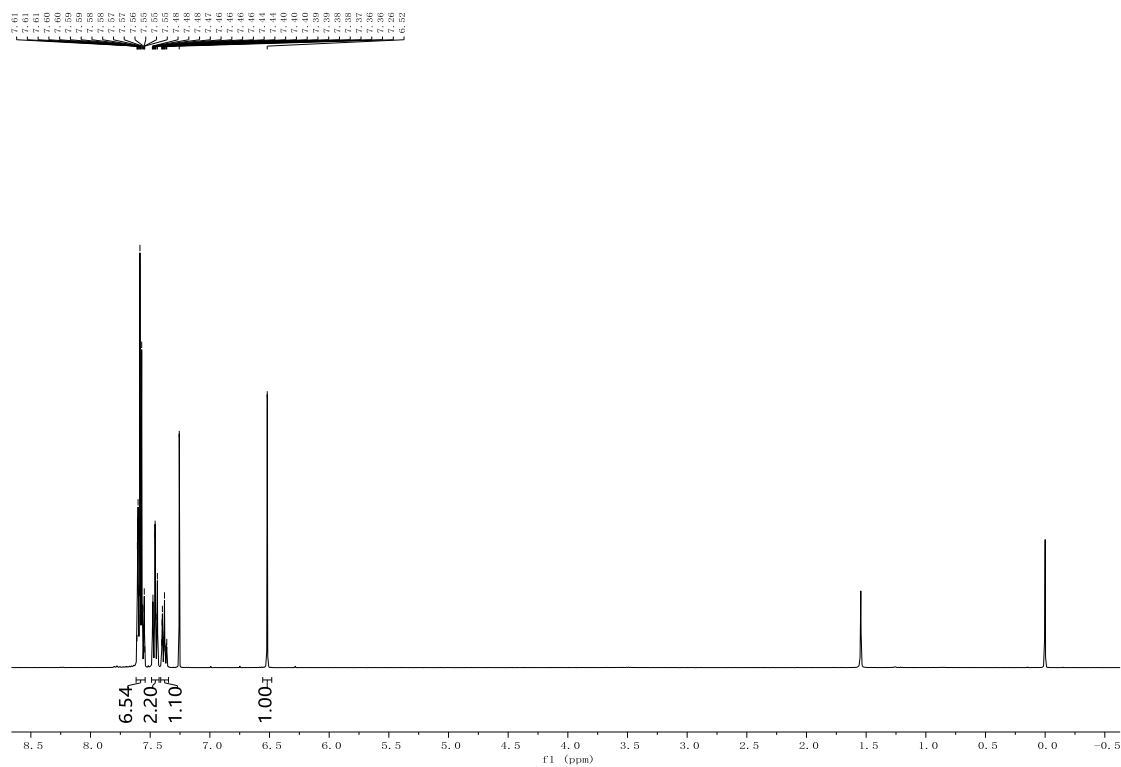

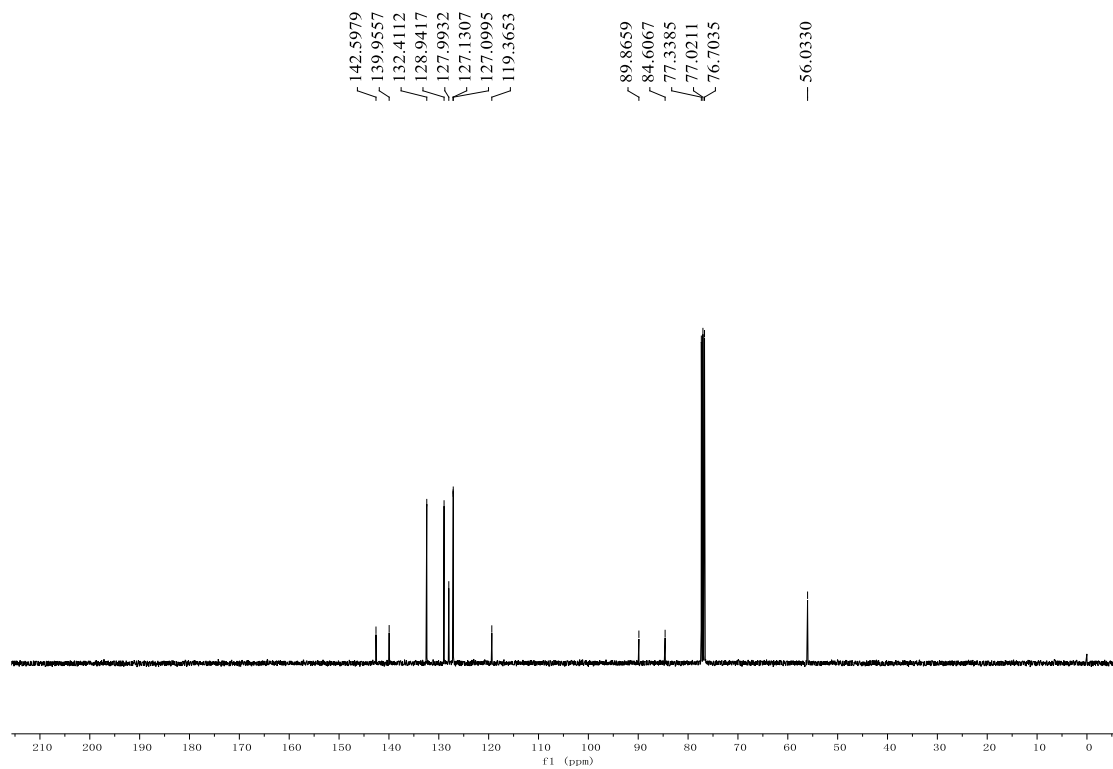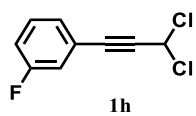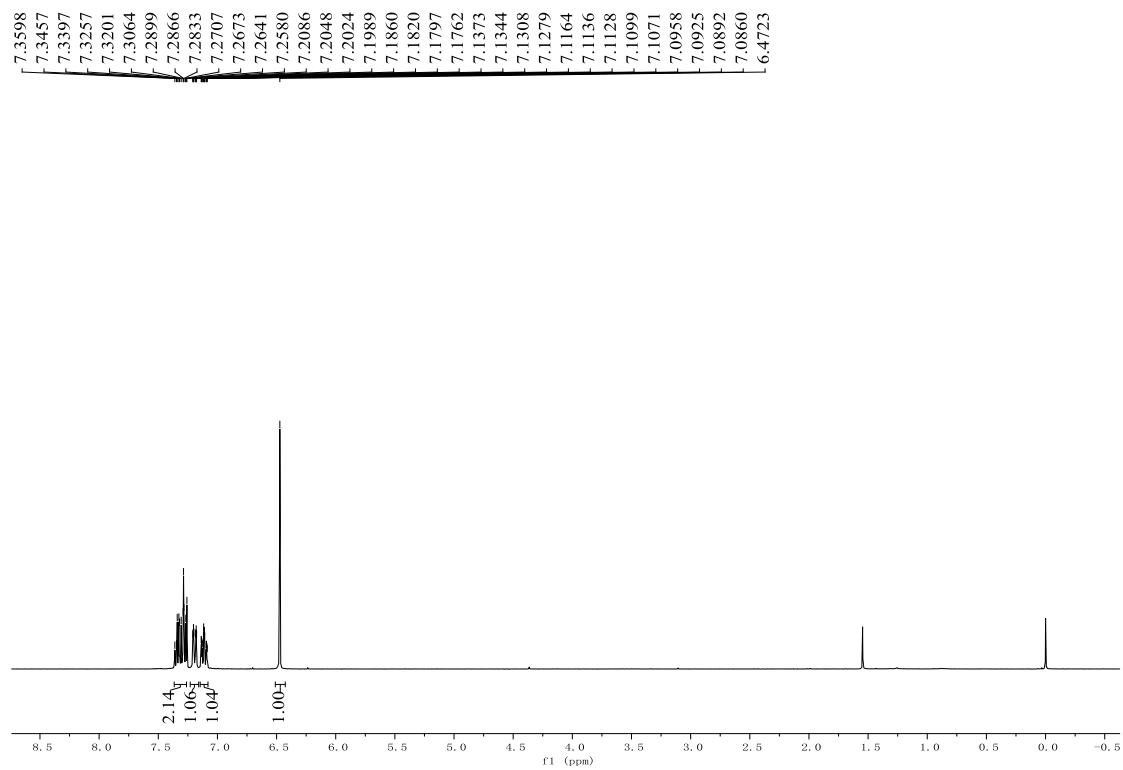

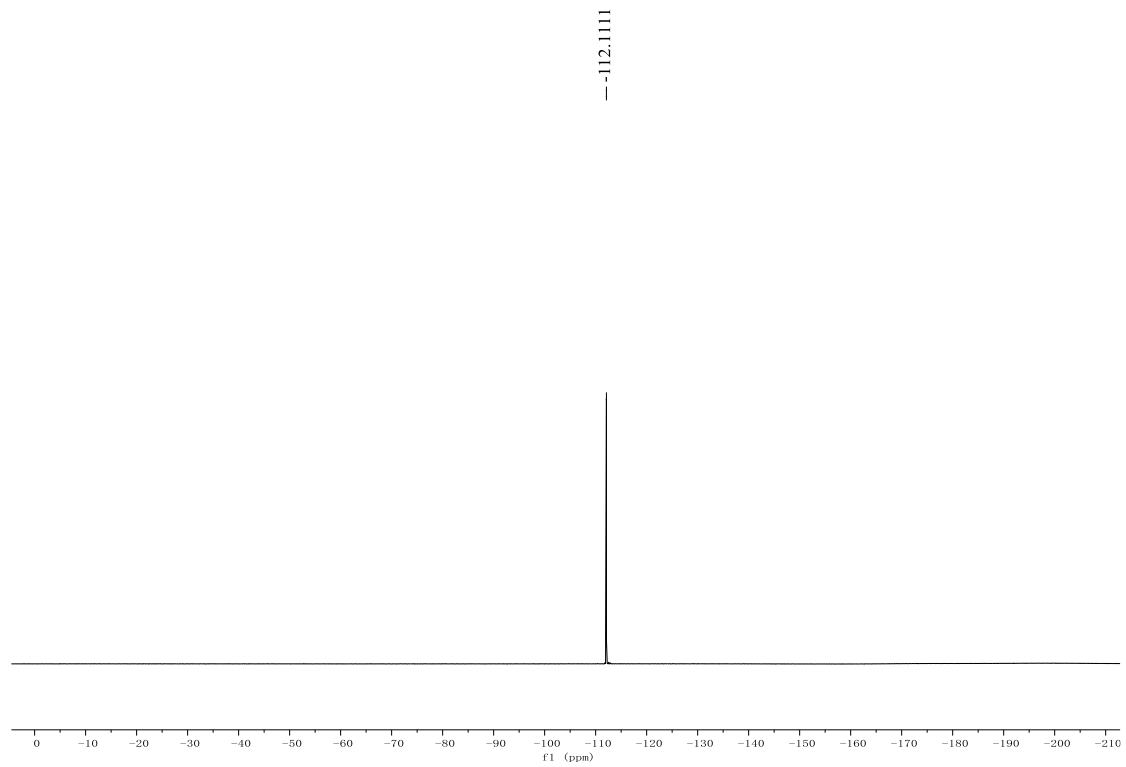

- 163.4932
- 161.0309
- 130.2164
- 130.1313
- 127.8936
- 127.8616
- 122.4119
- 122.3179
- 118.9179
- 118.6863
- 117.3681
- 117.1577
- 88.3228
- 88.2885
- 84.7070
- 77.3293
- 77.0119
- 76.6940
- 55.5981

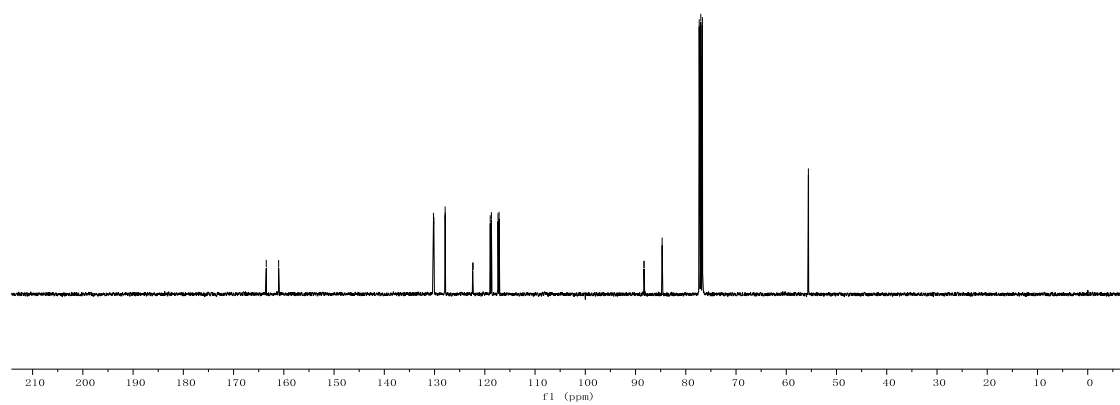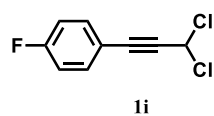

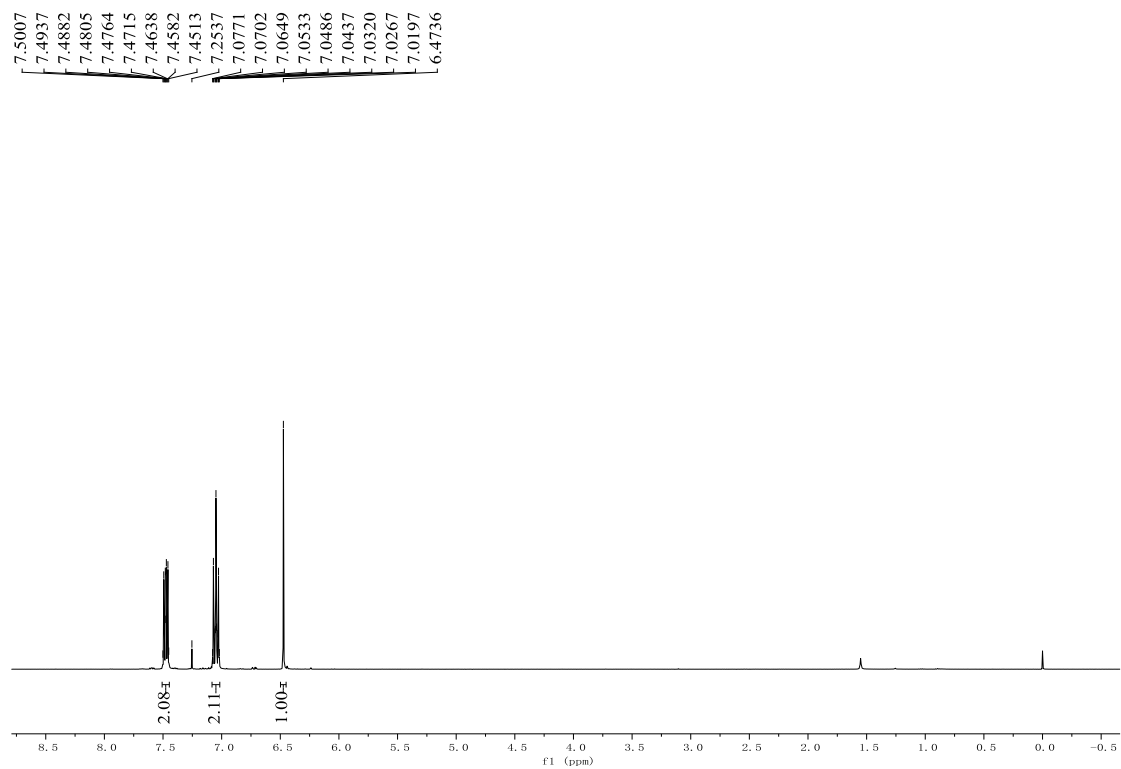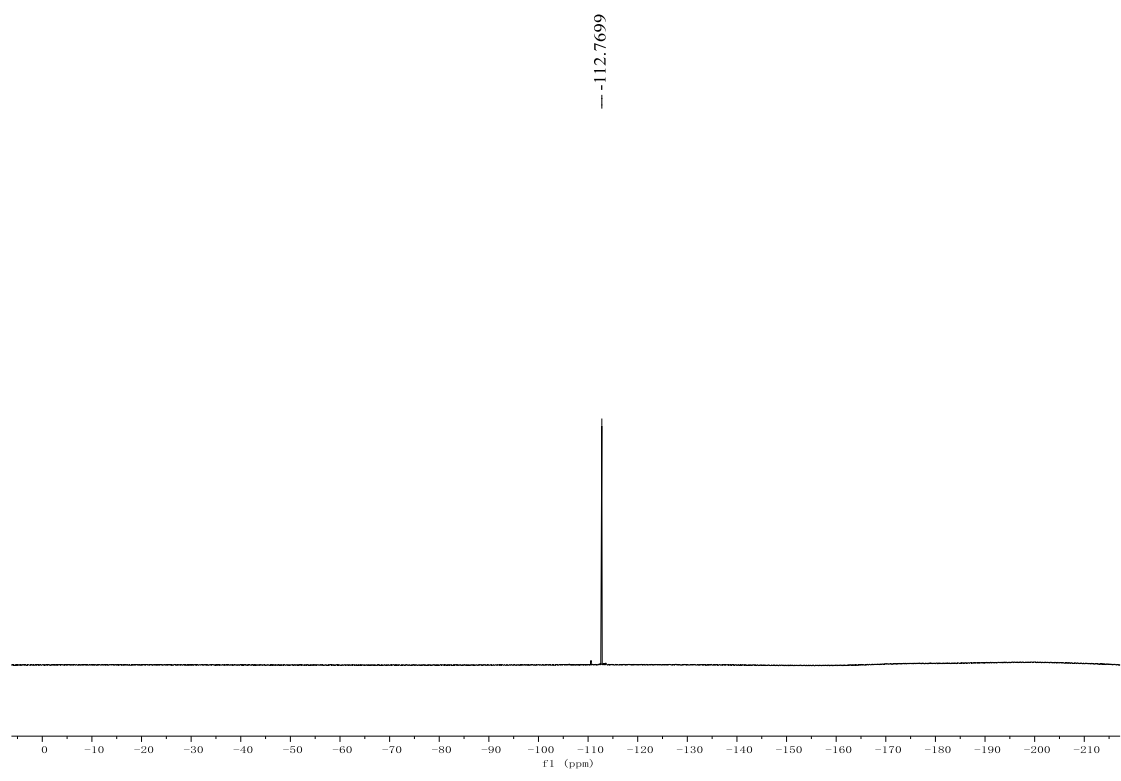

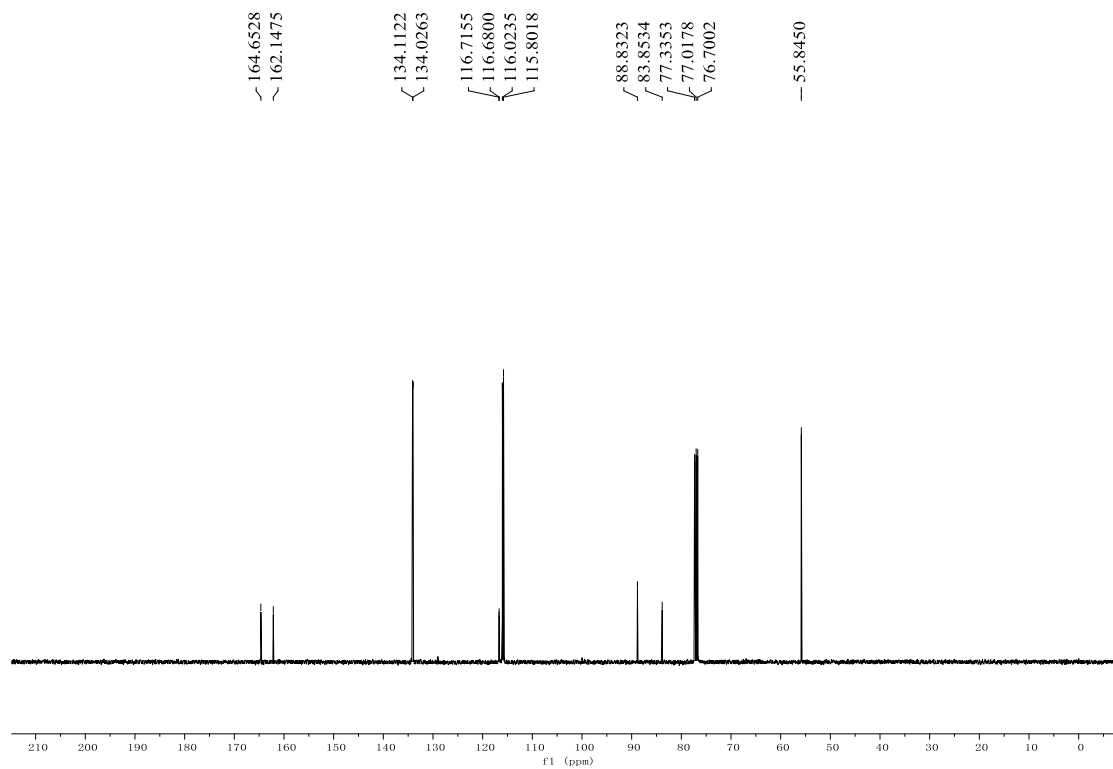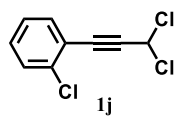



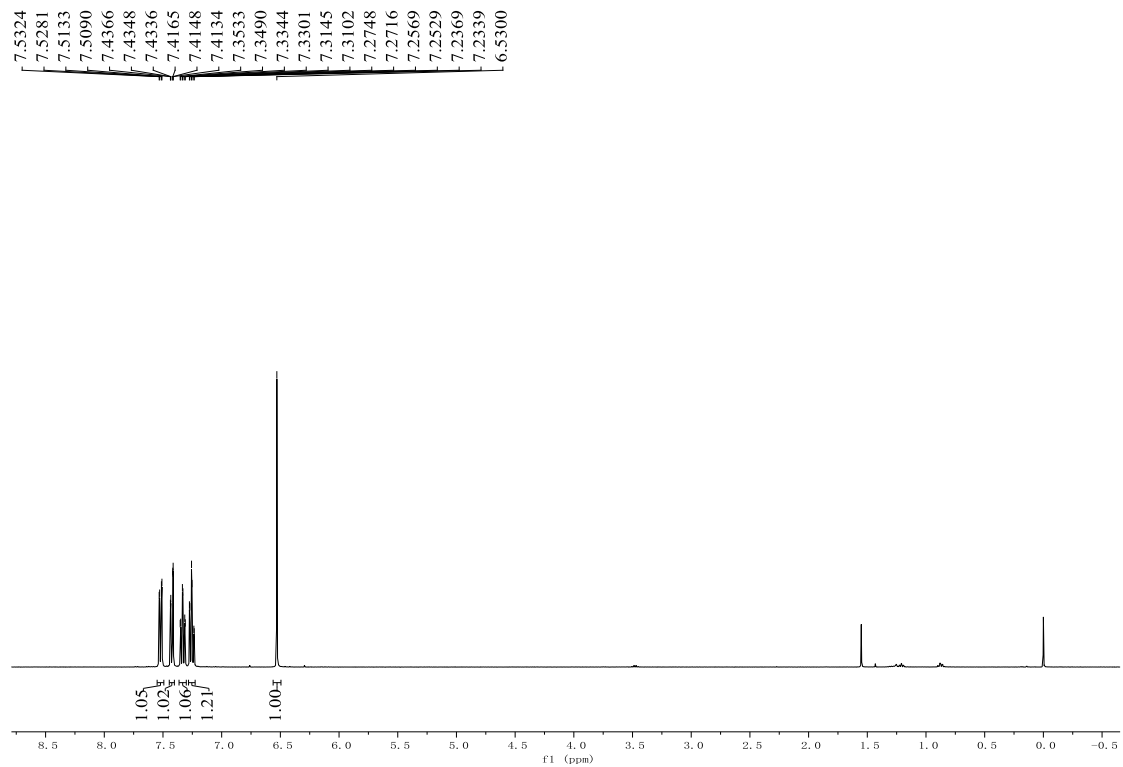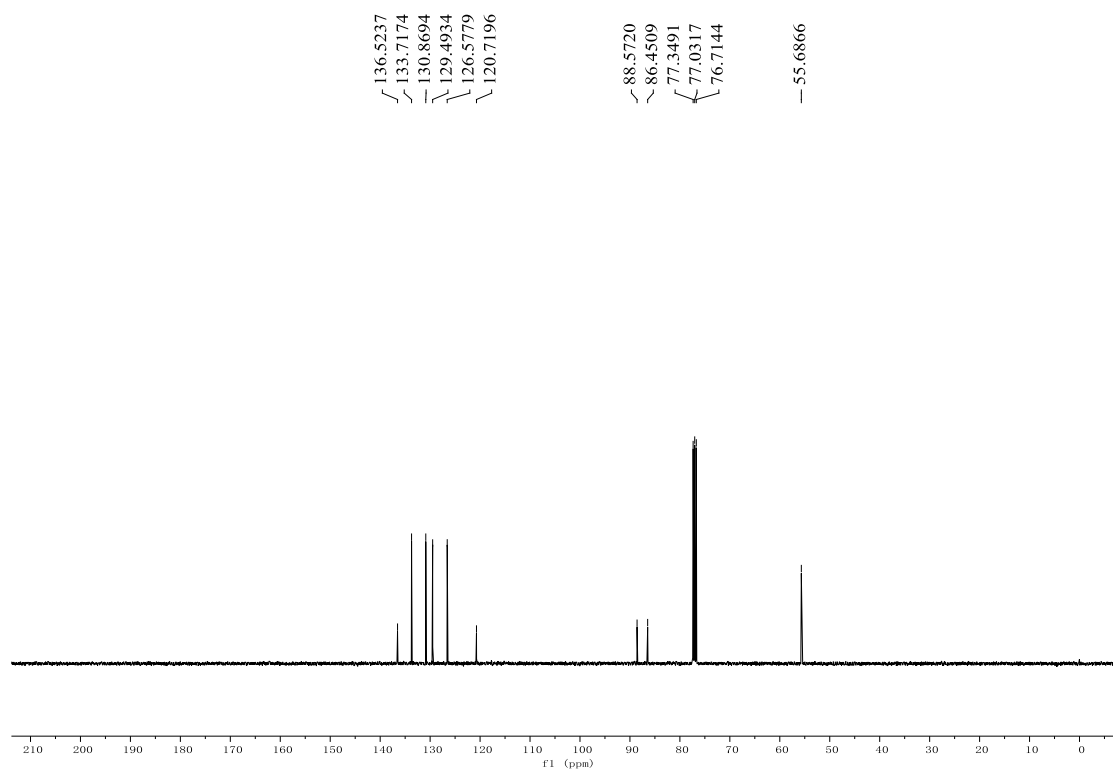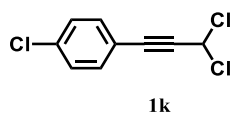

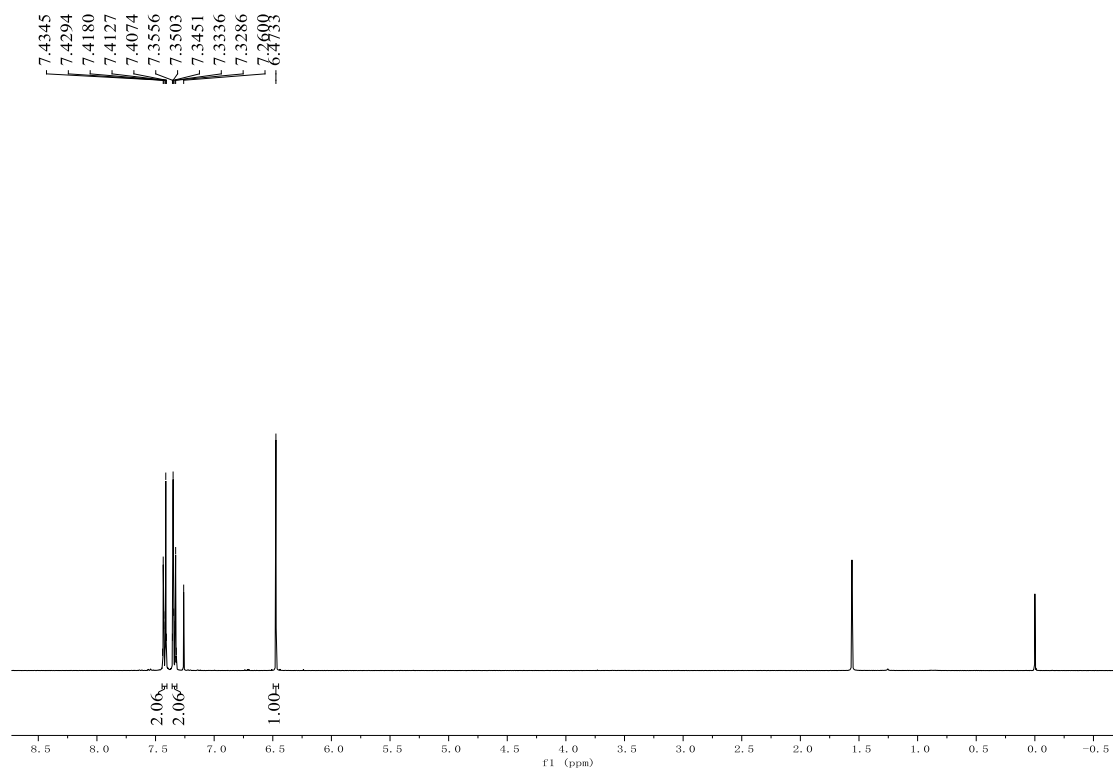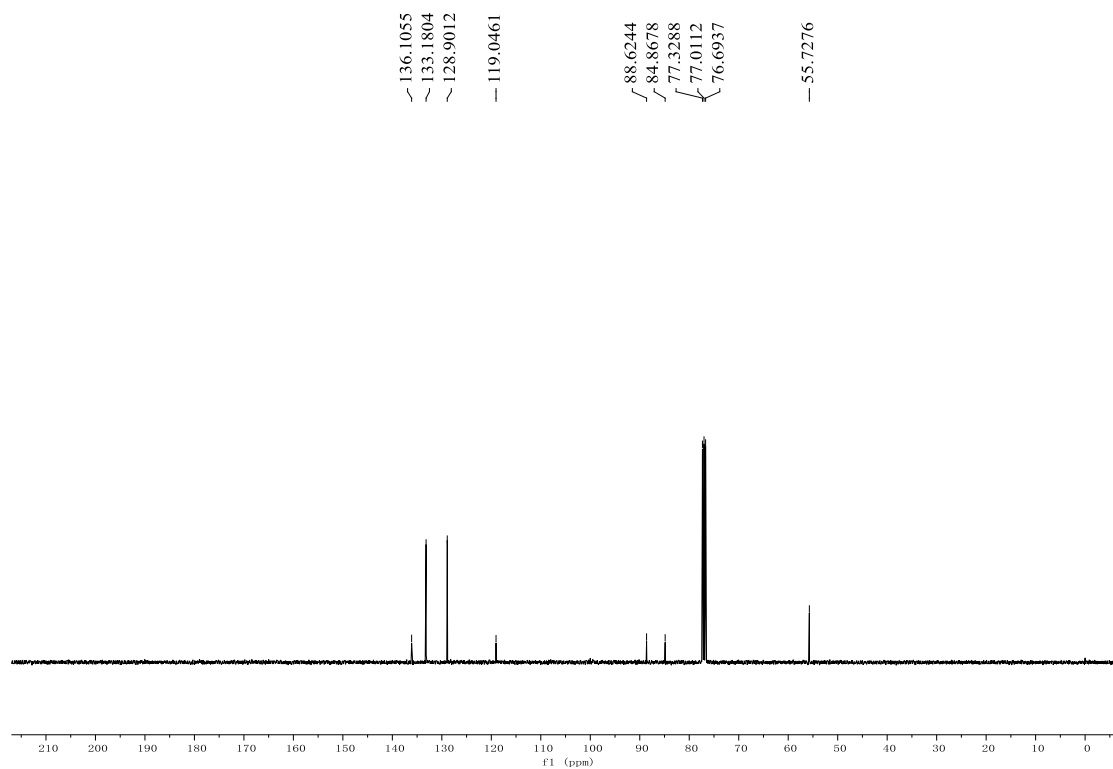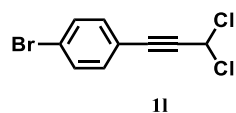

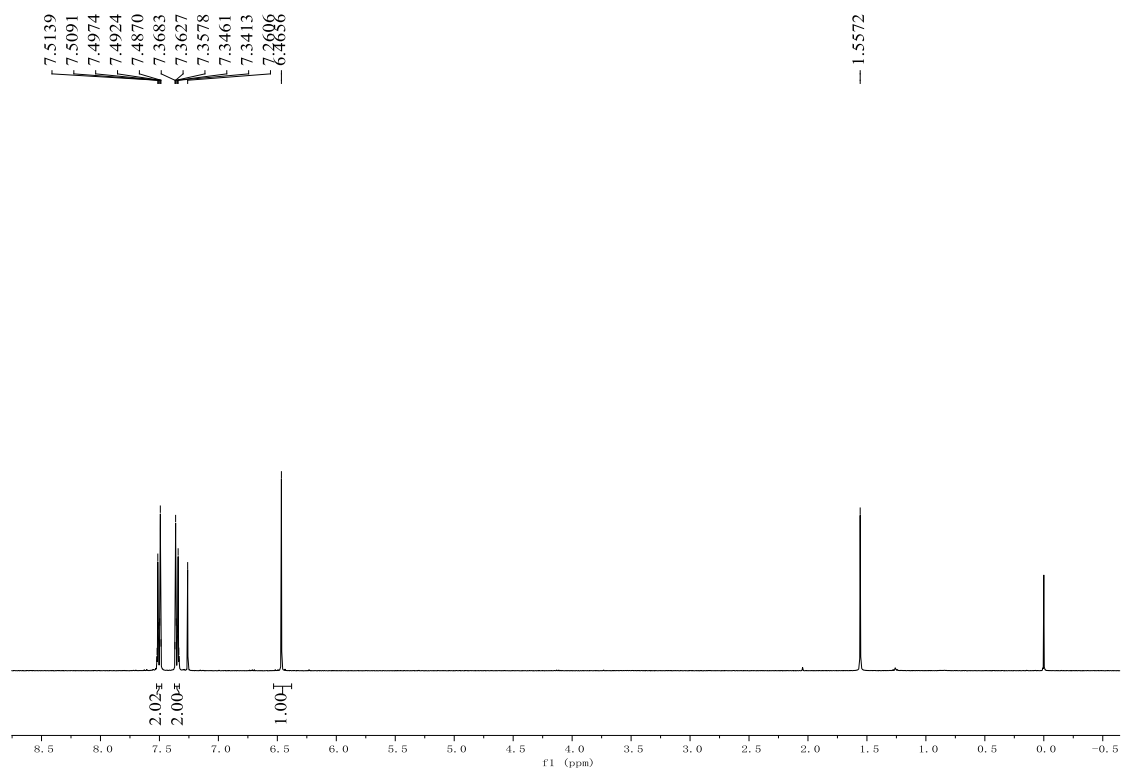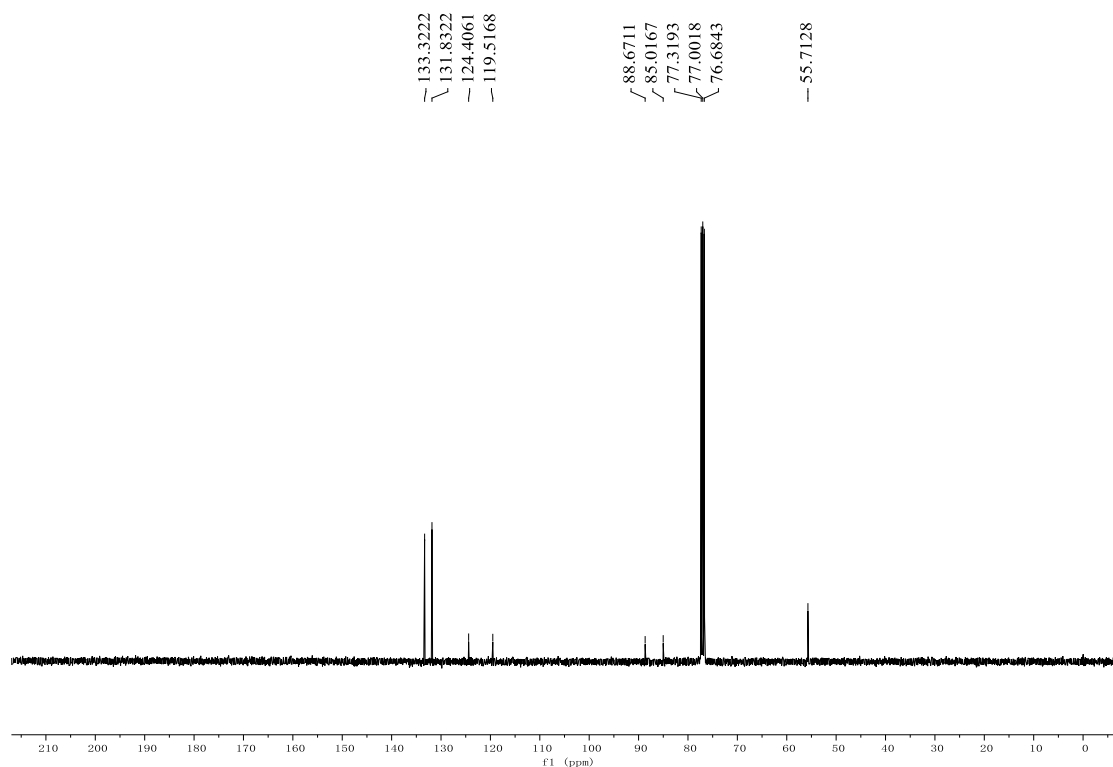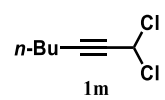

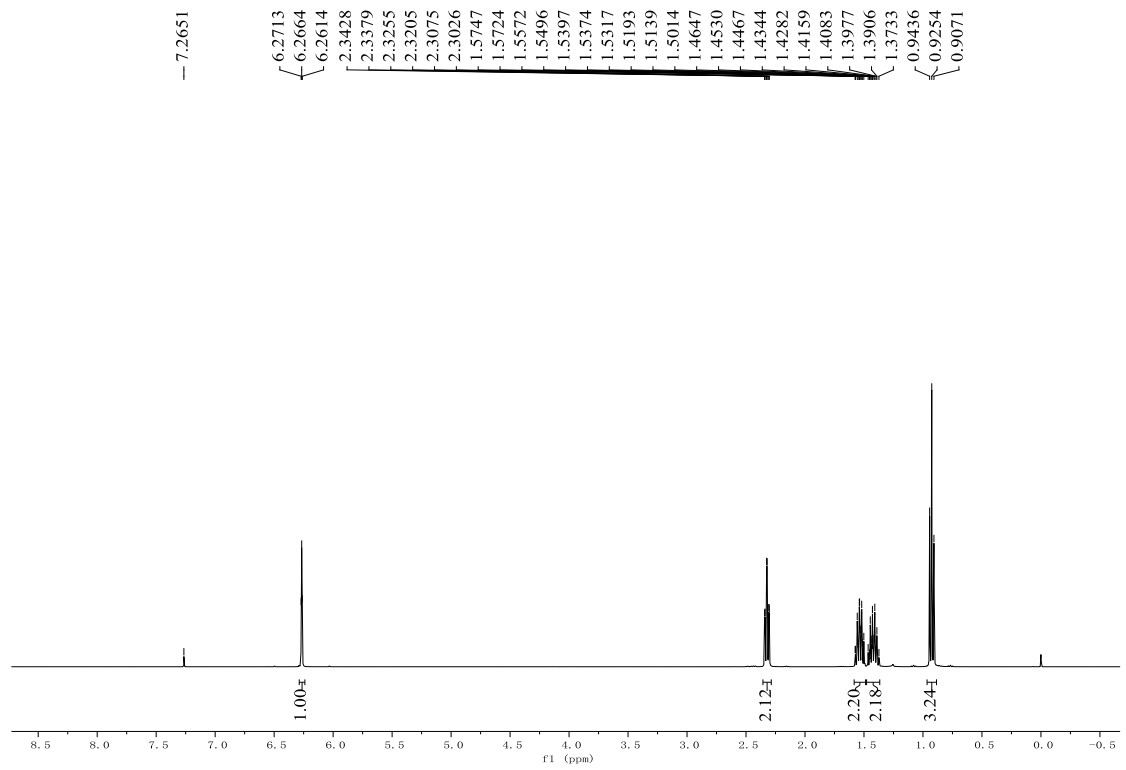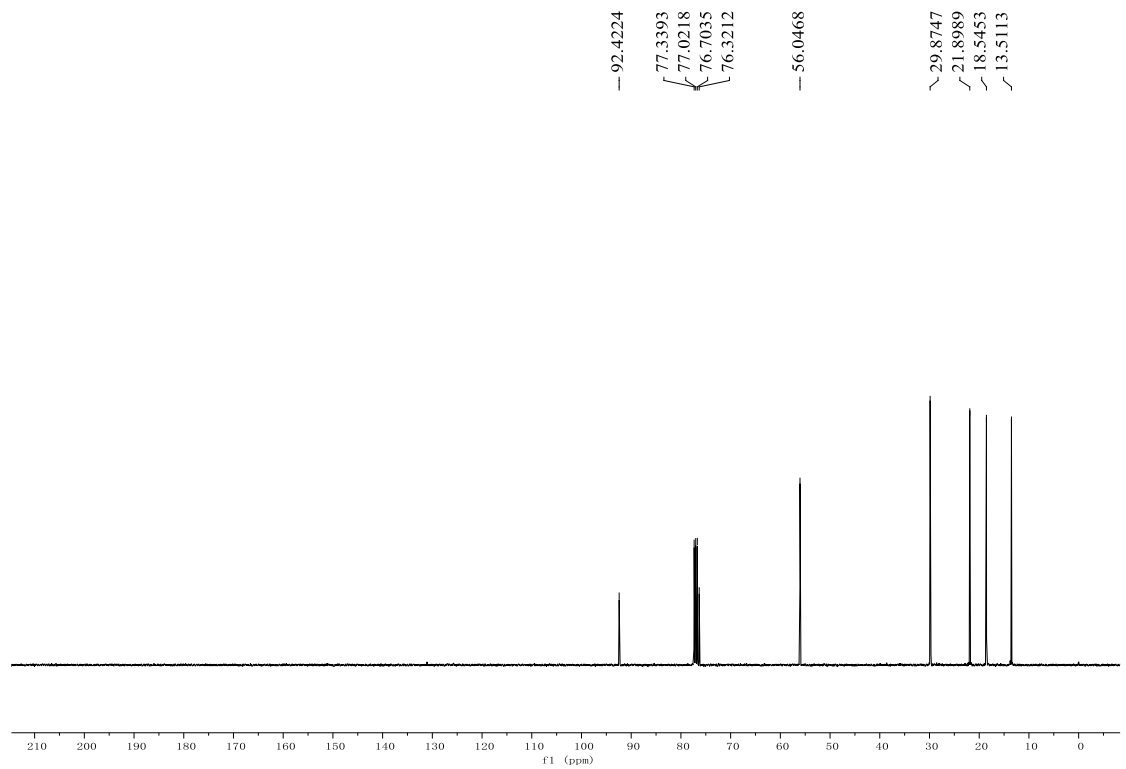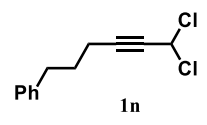

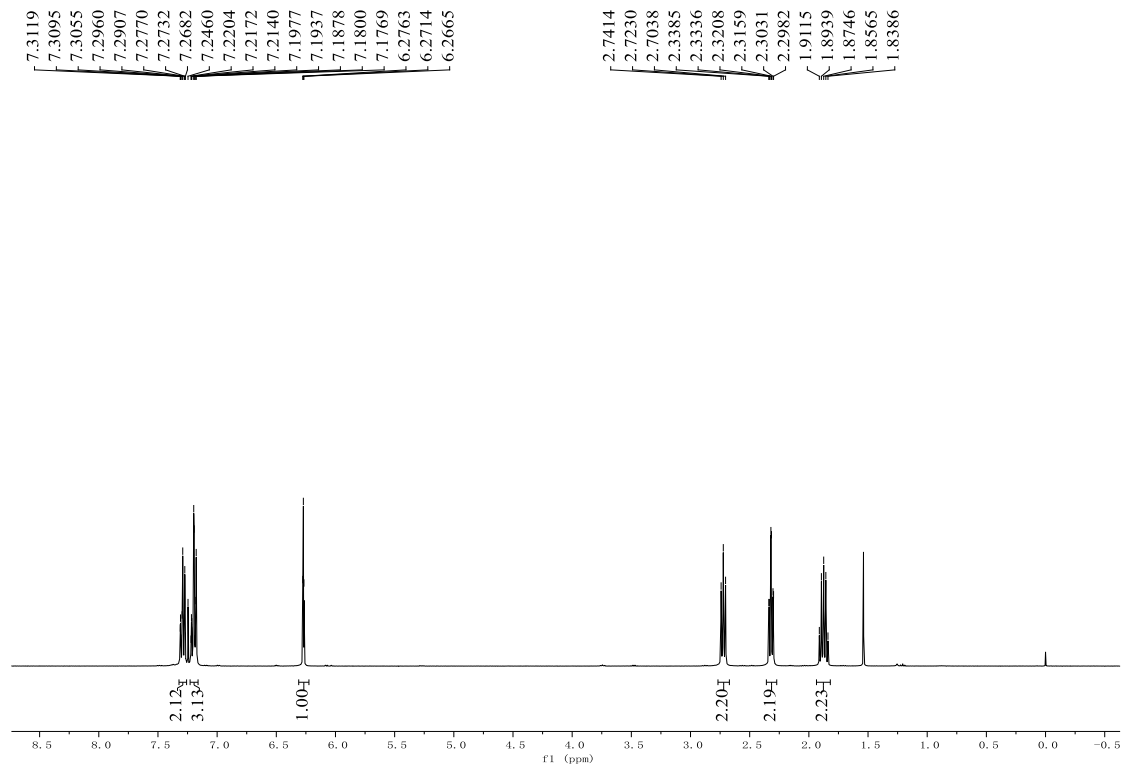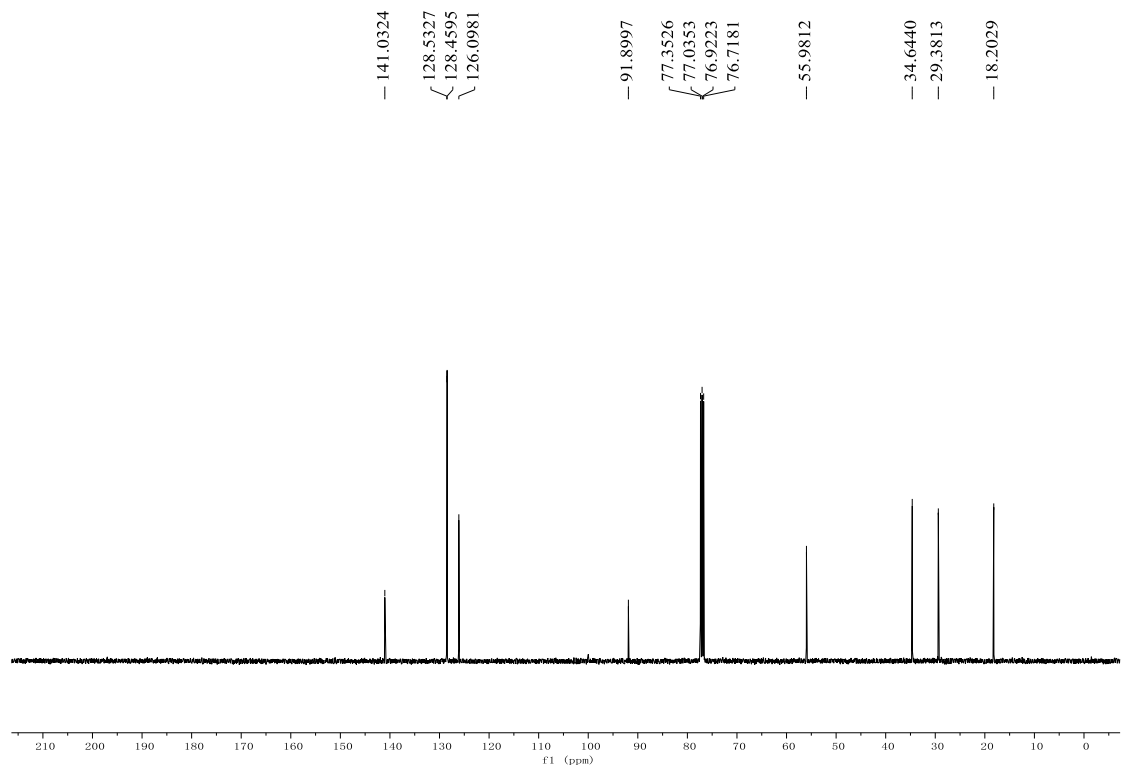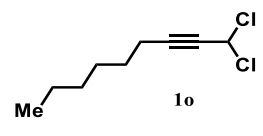

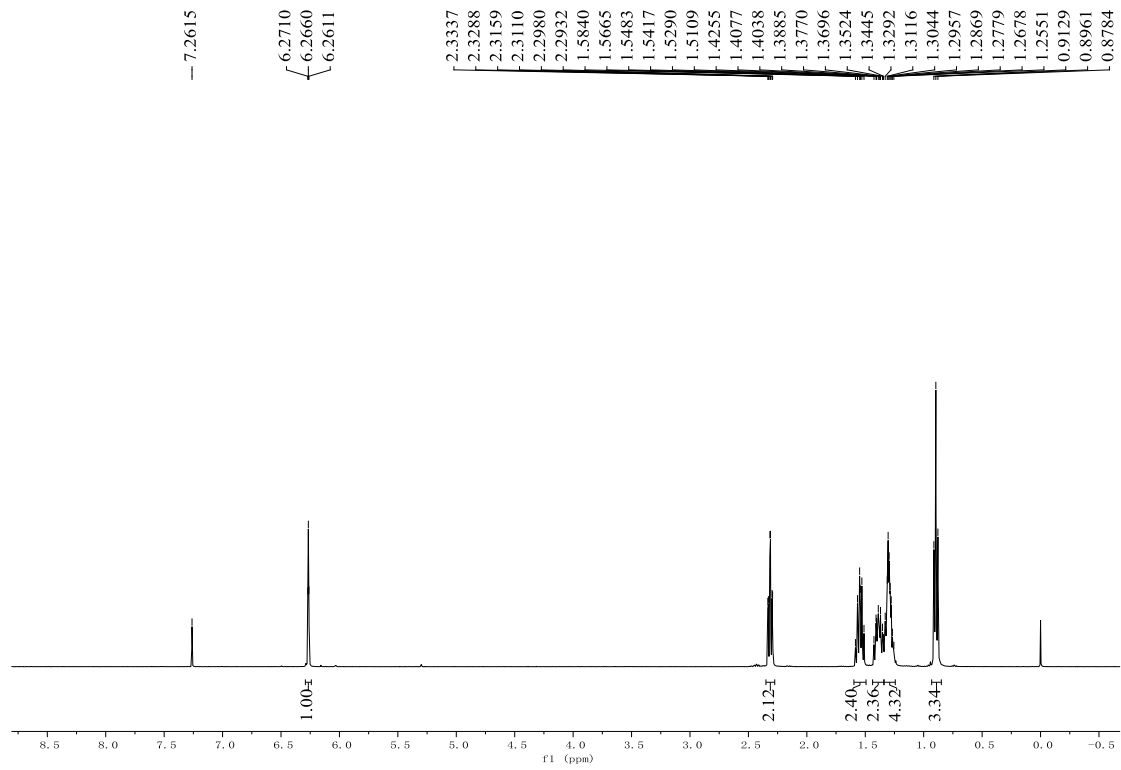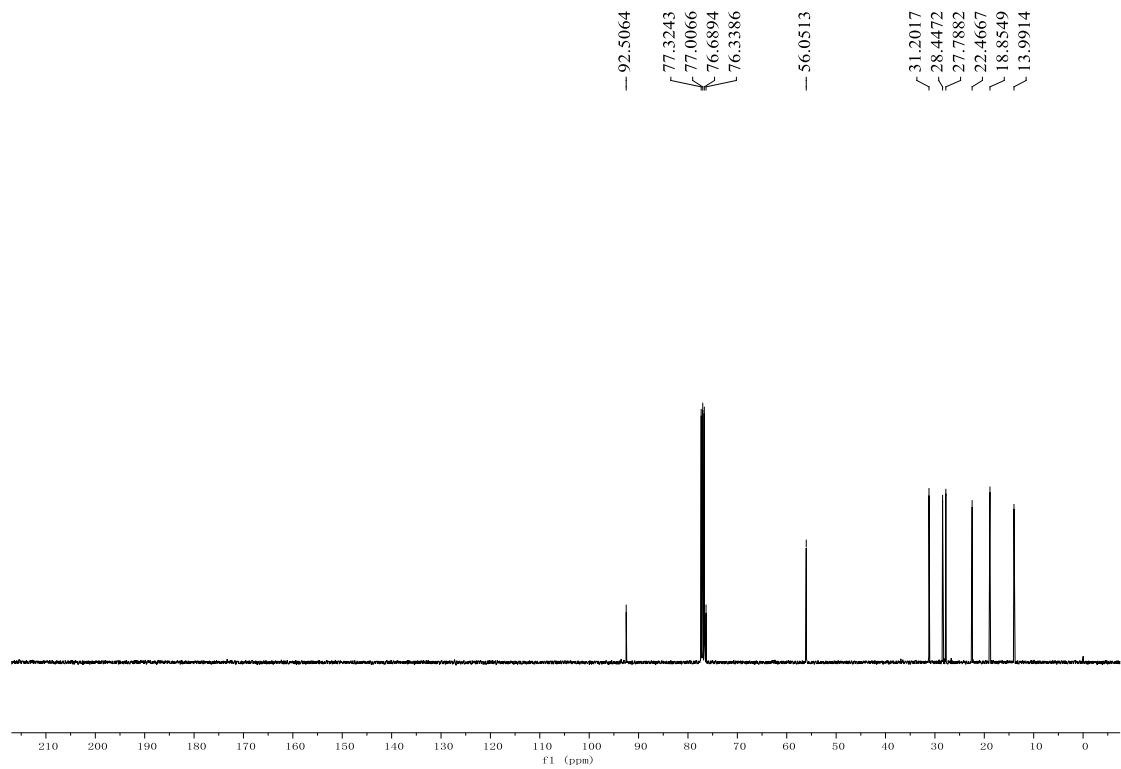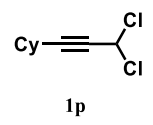

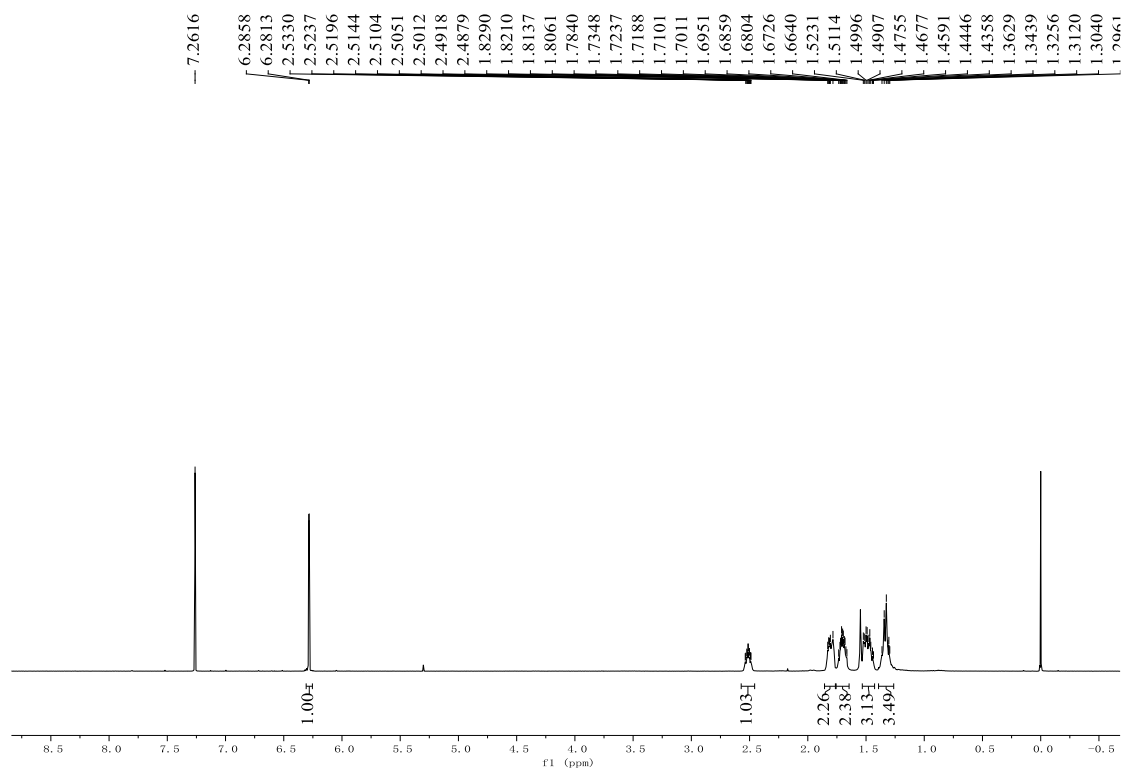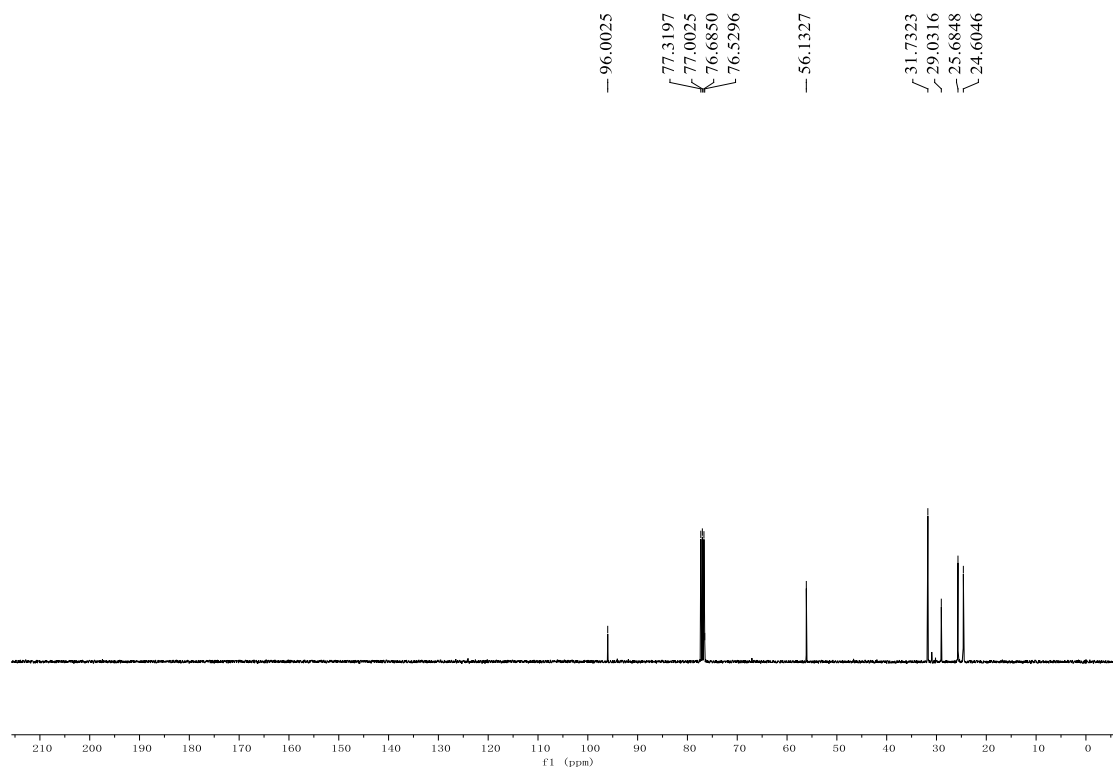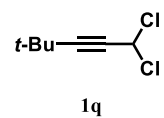

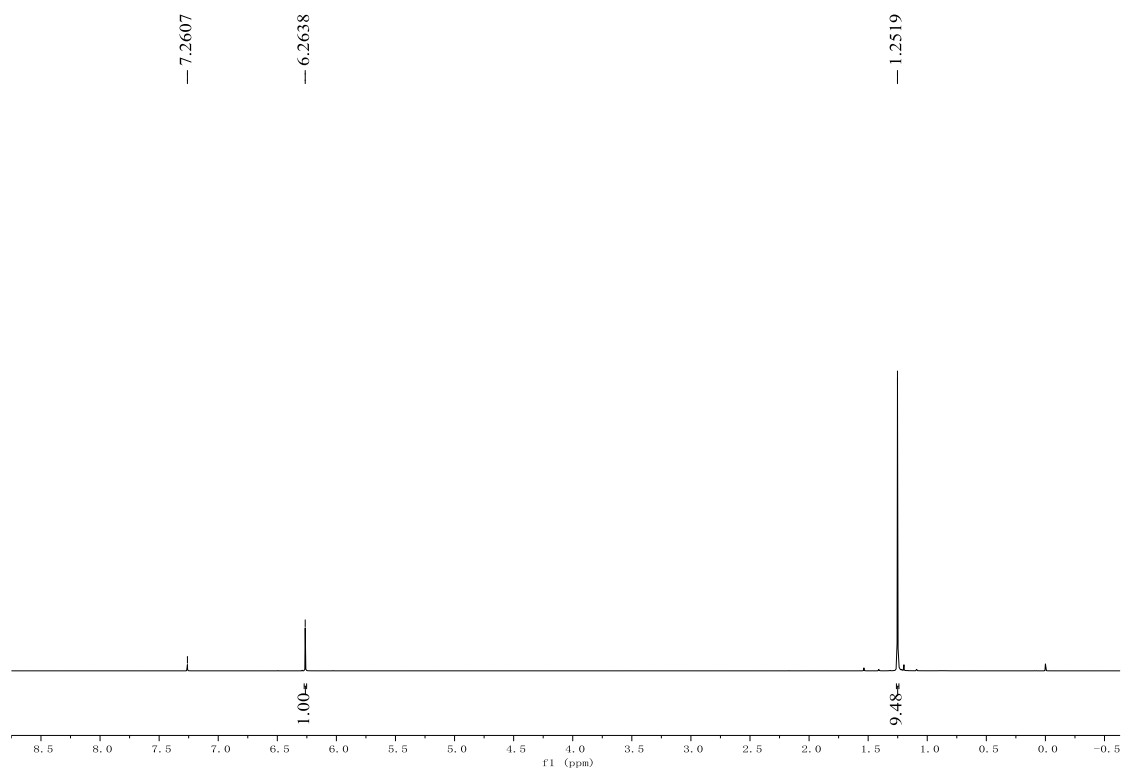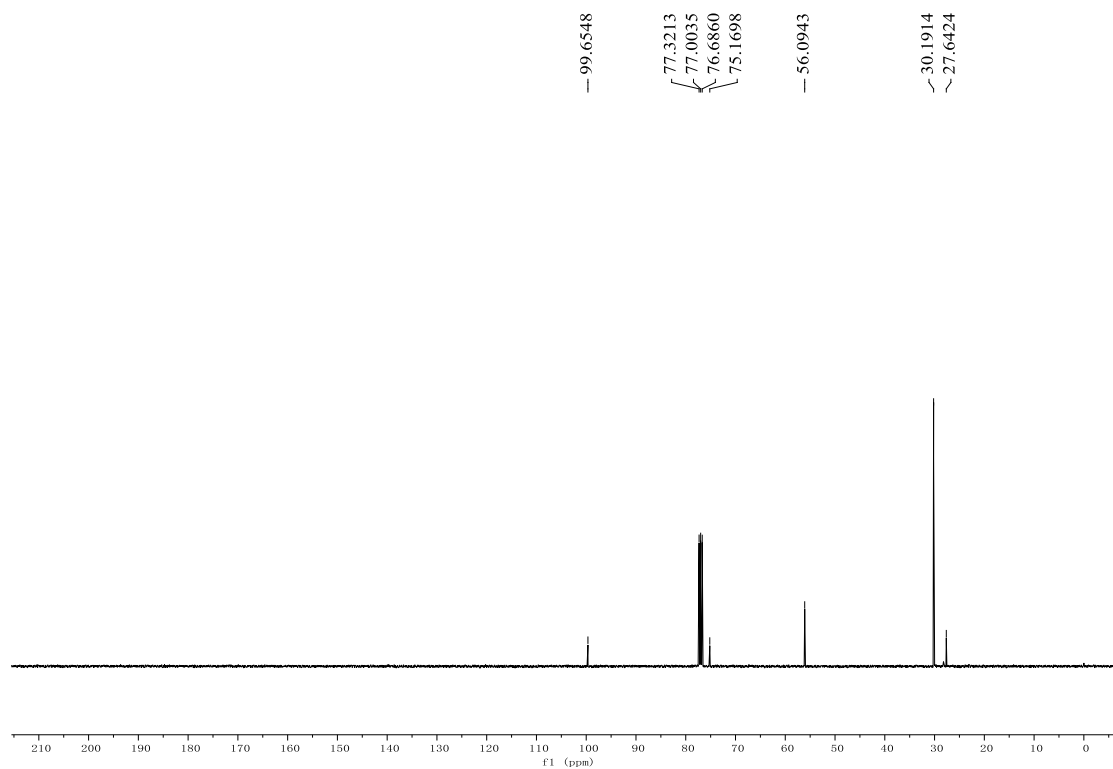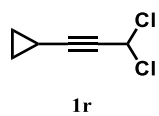



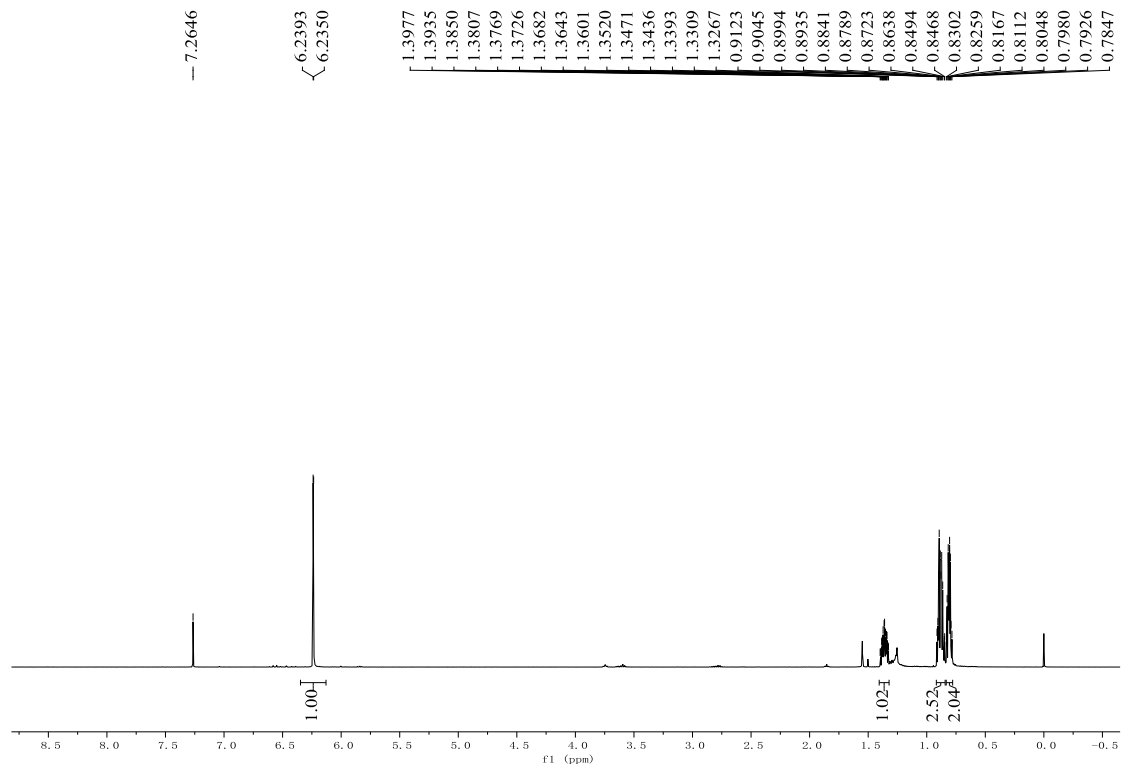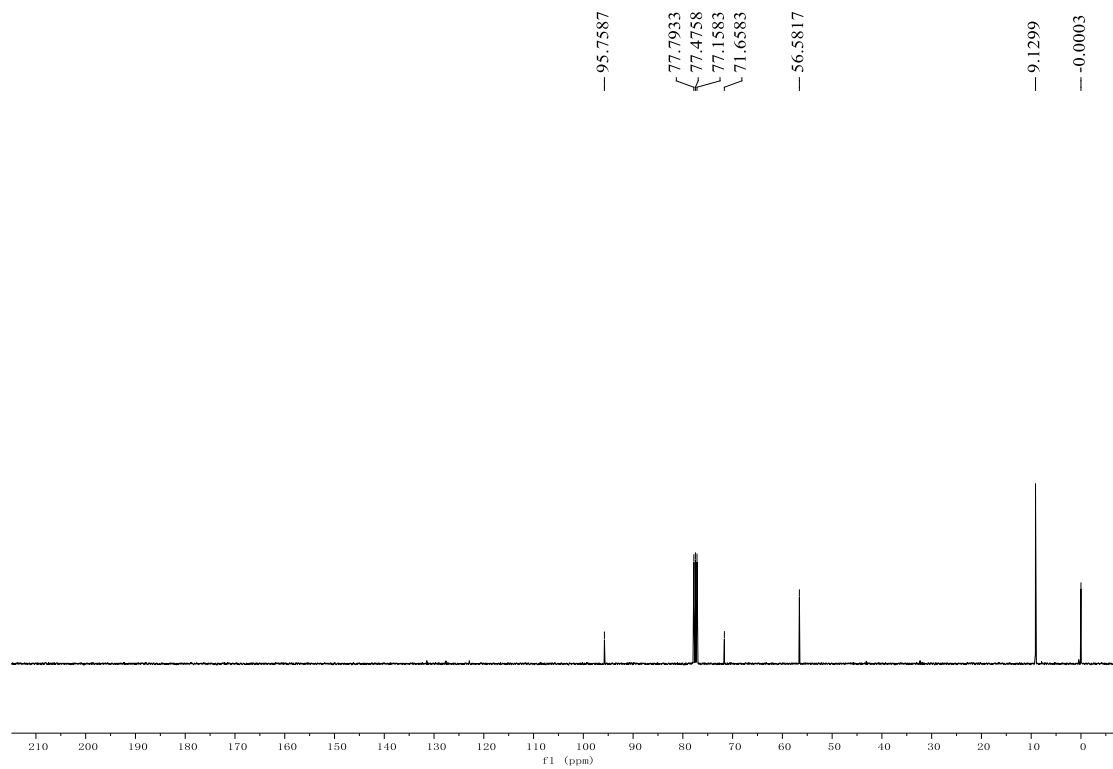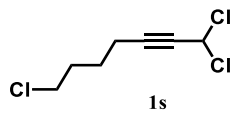

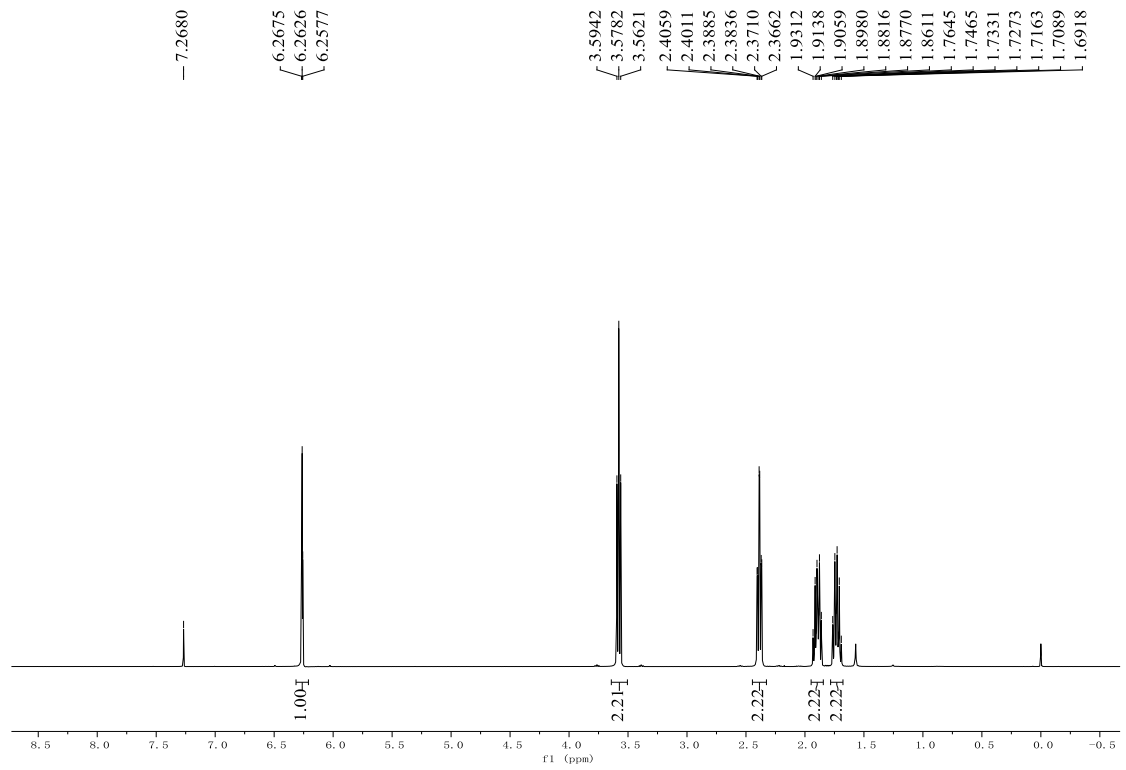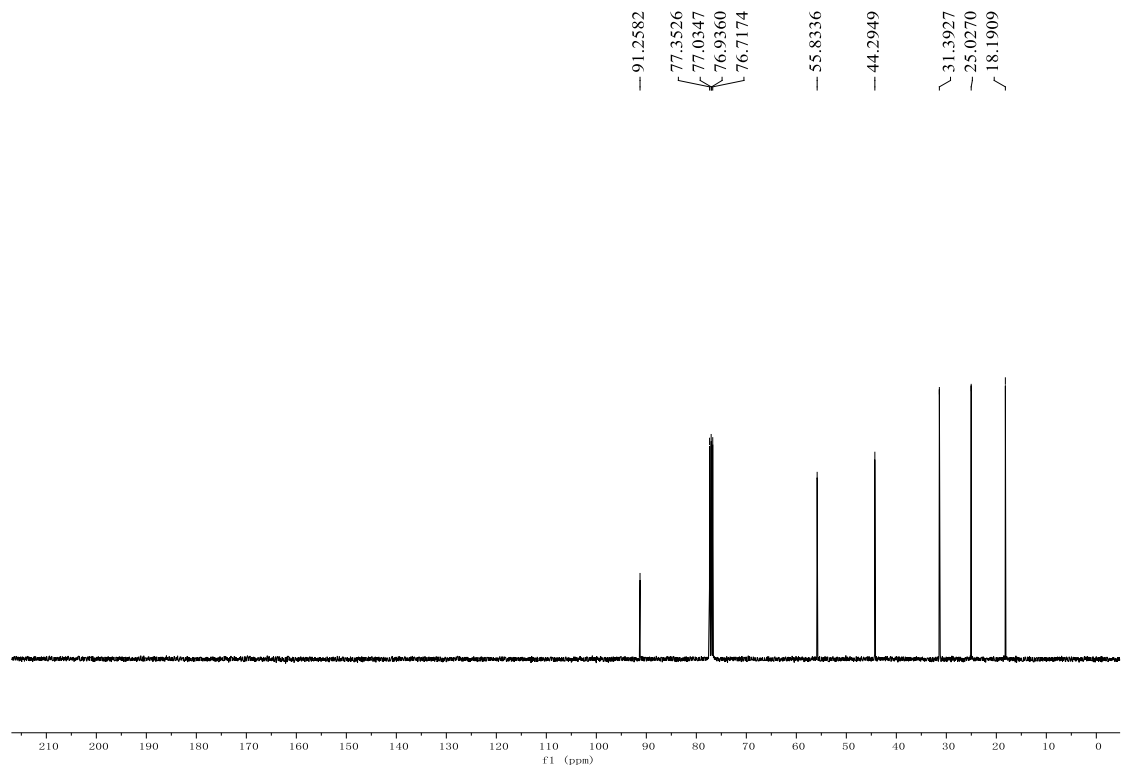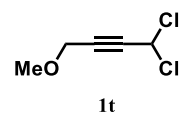

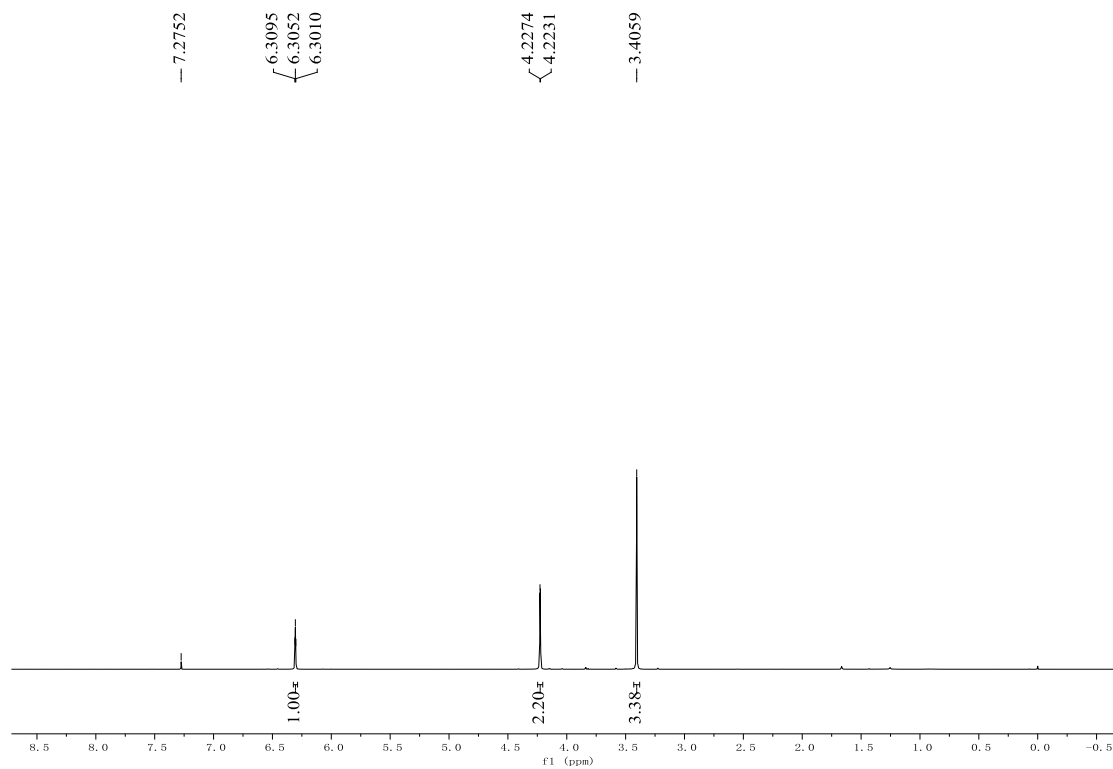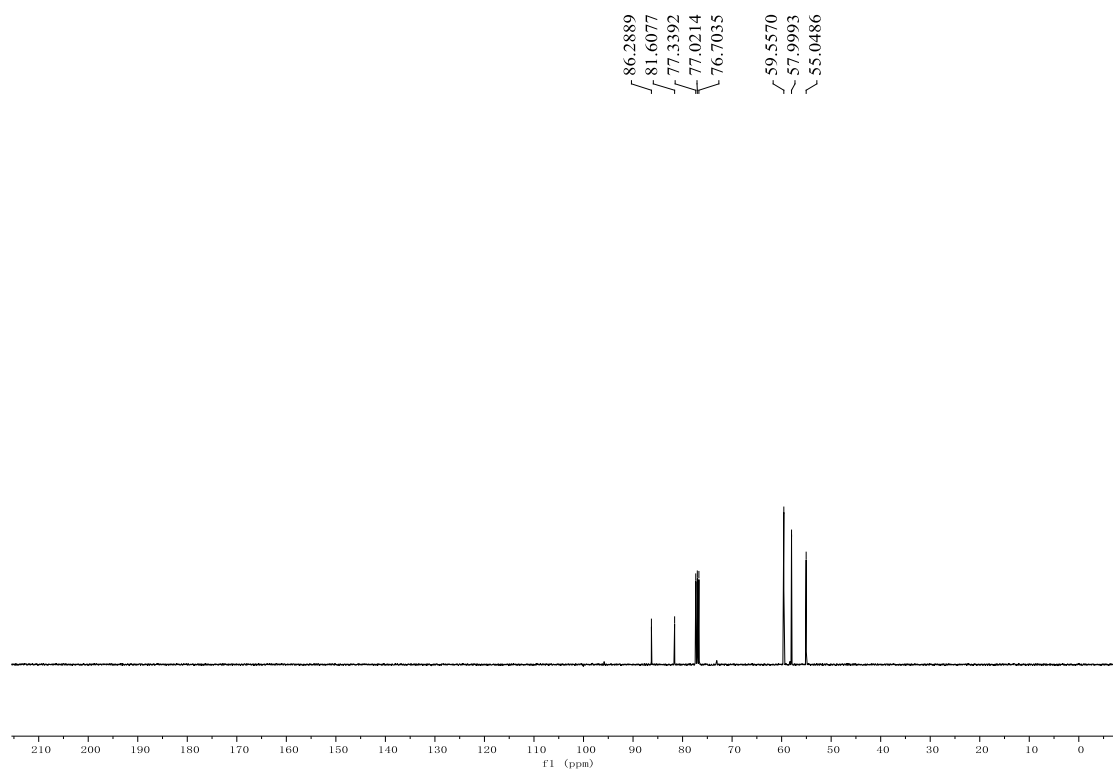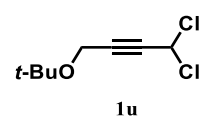

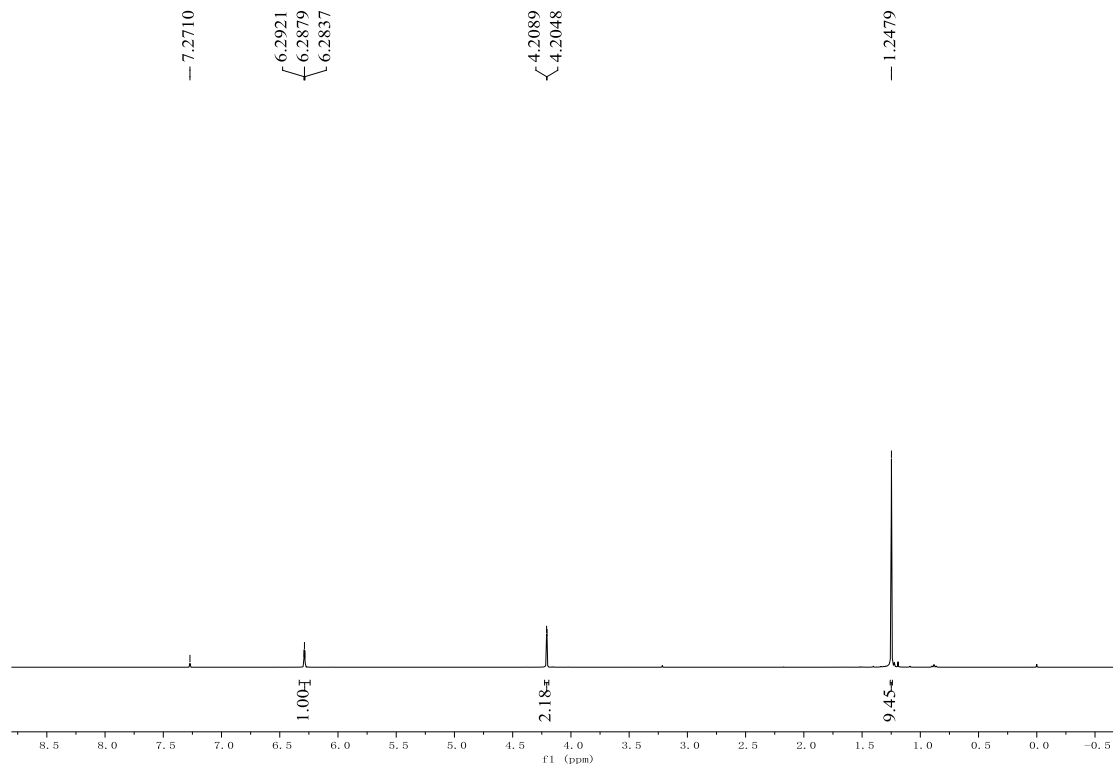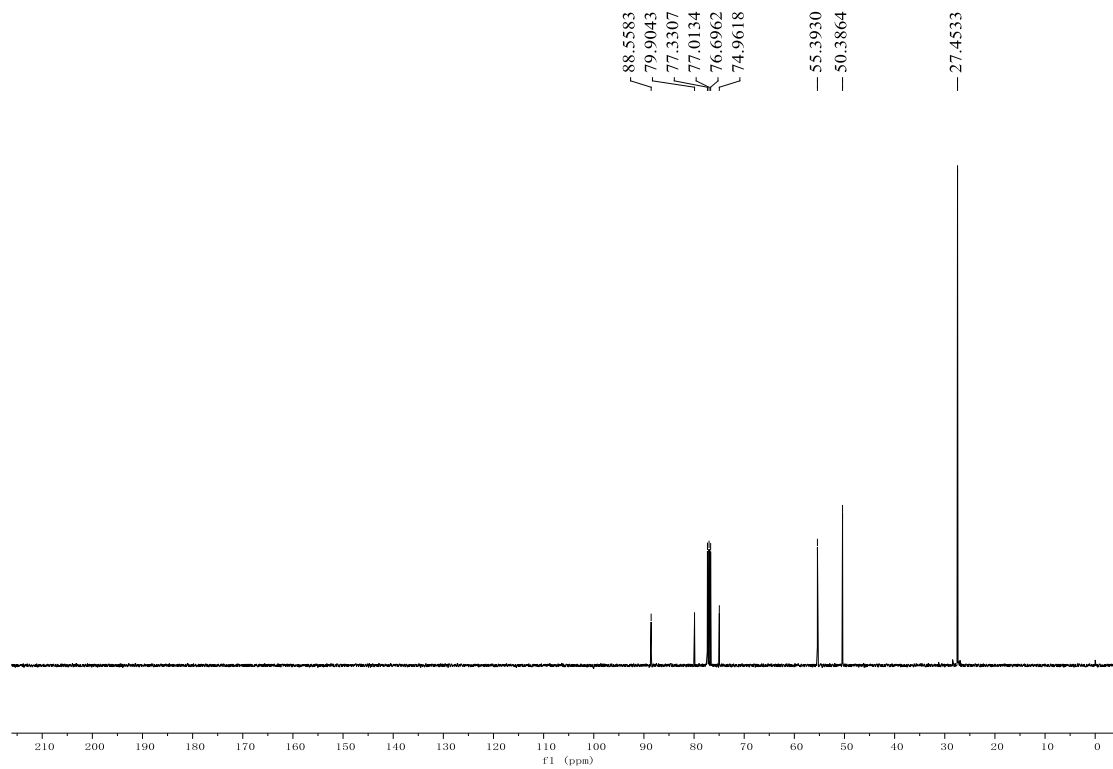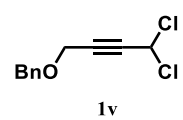

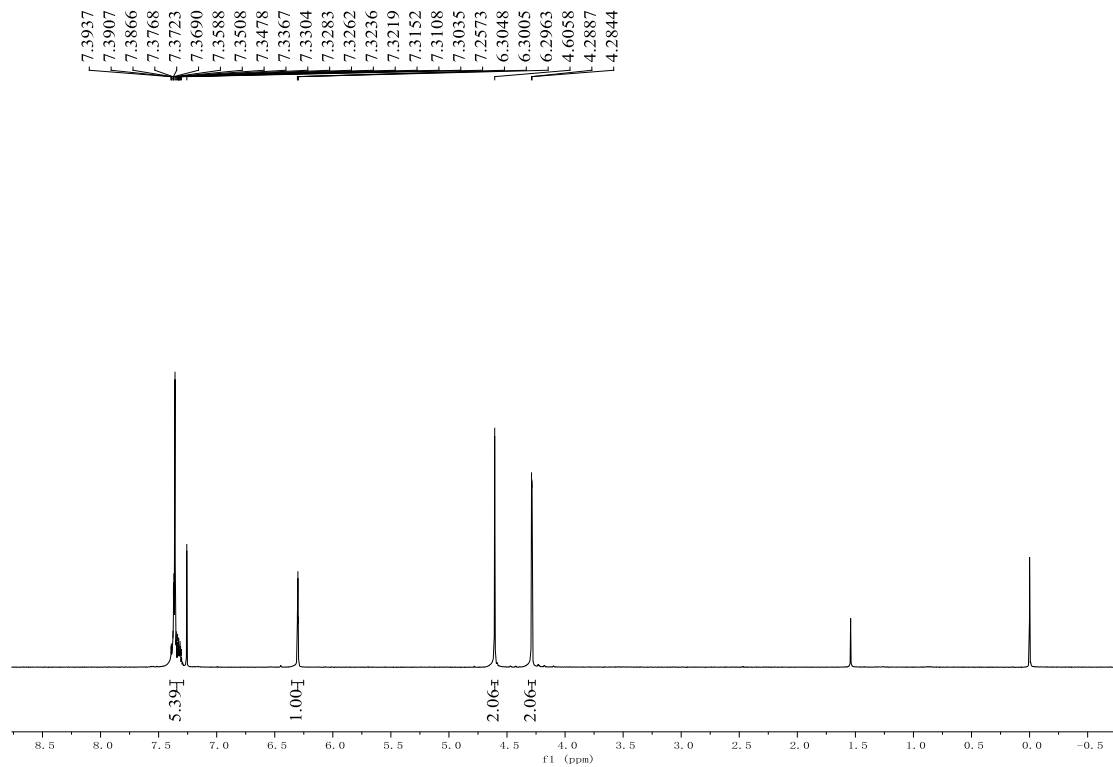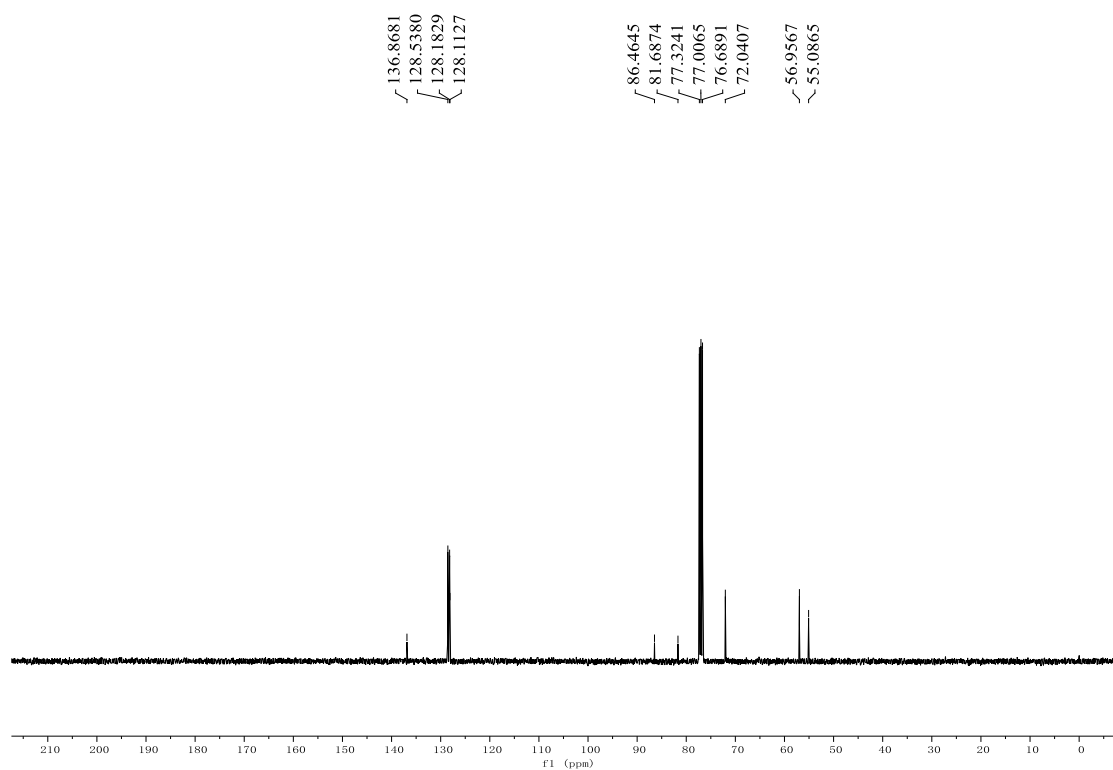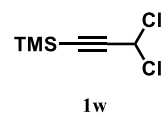

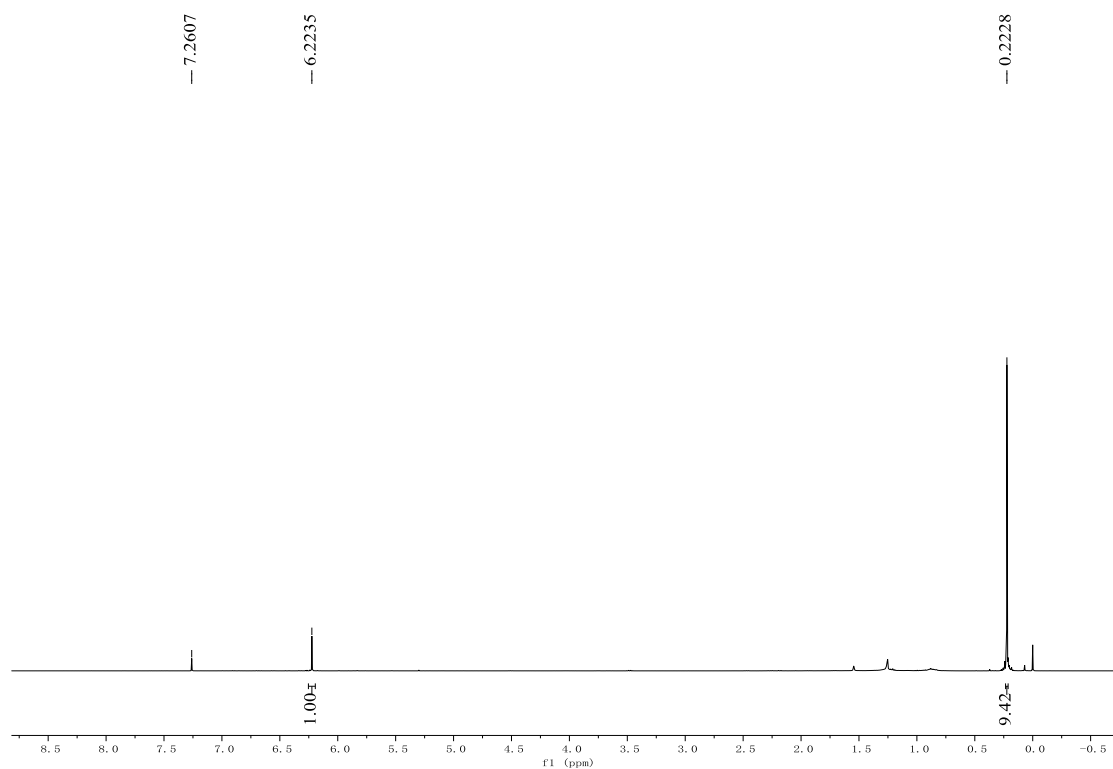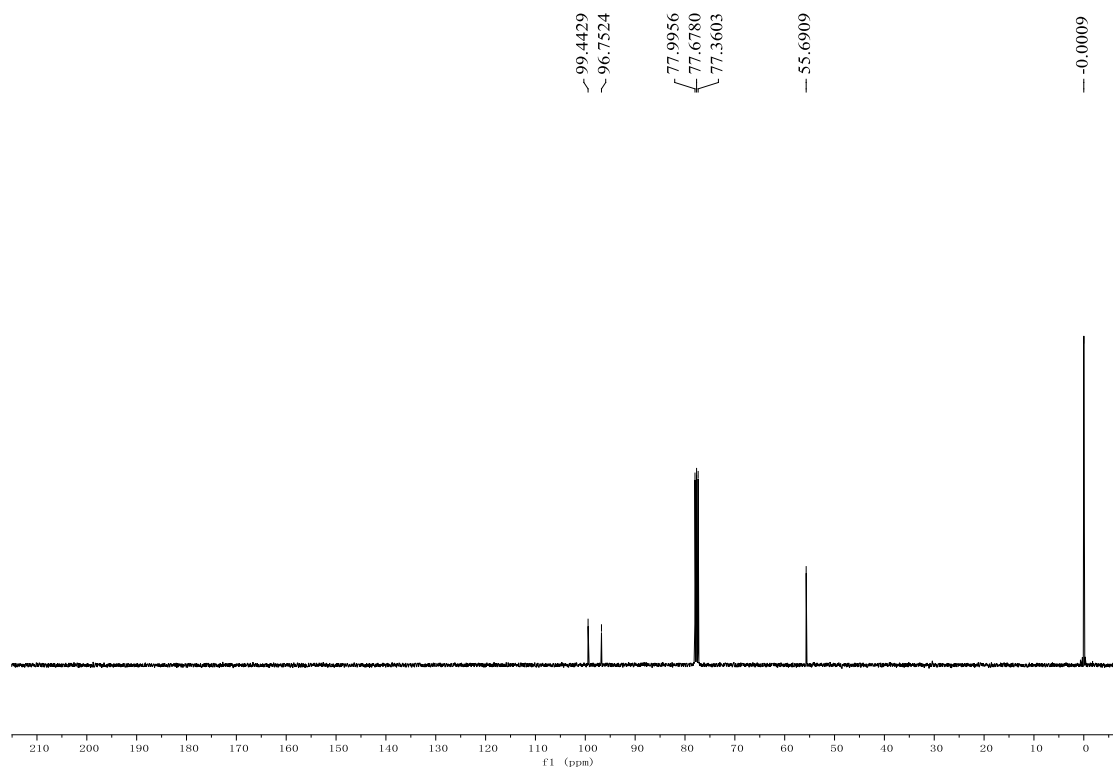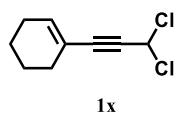

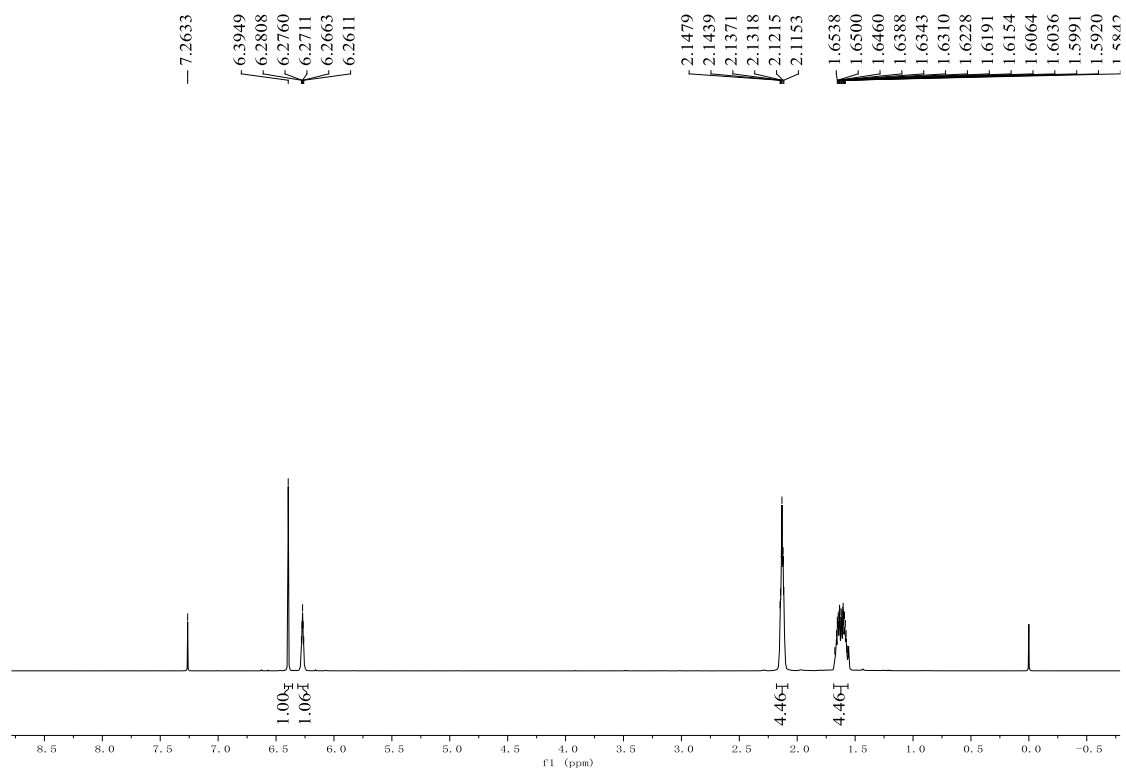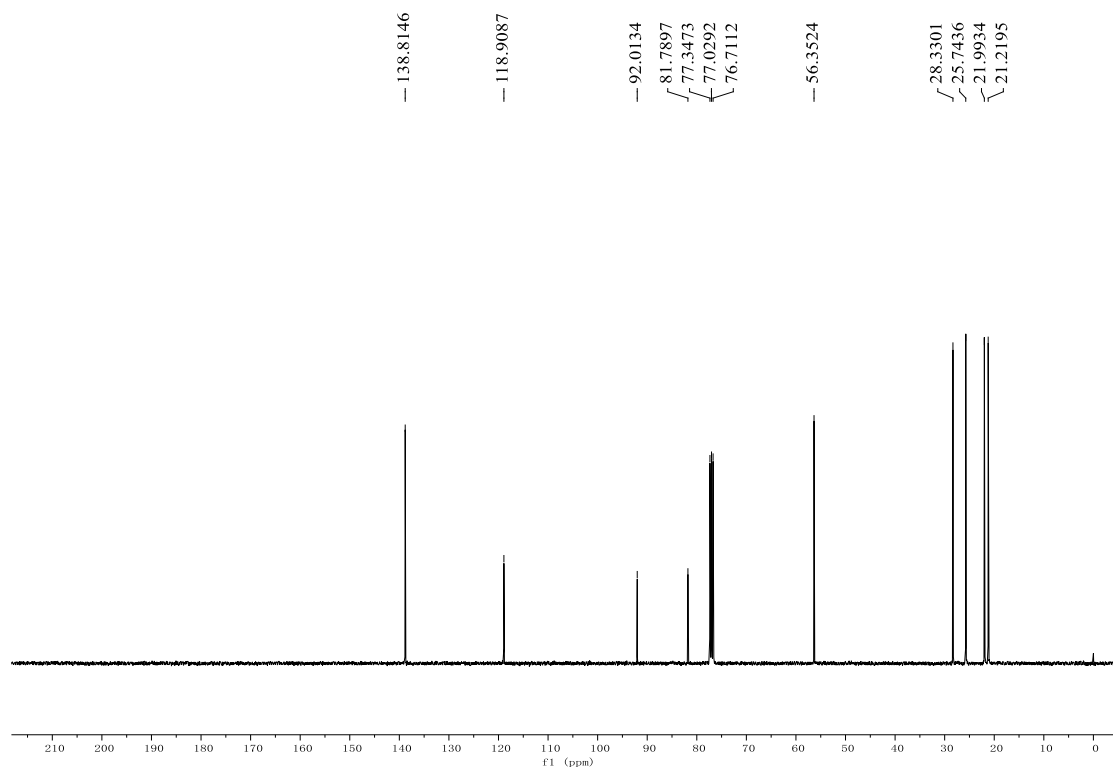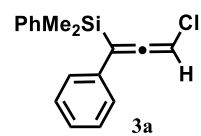

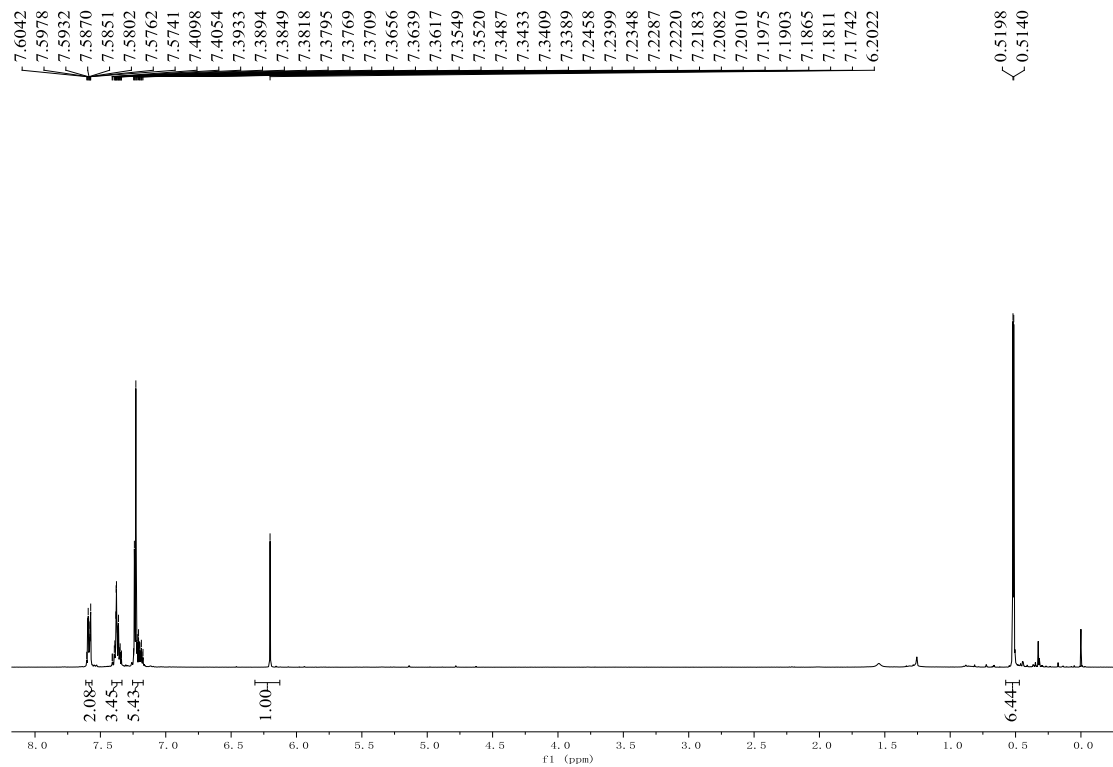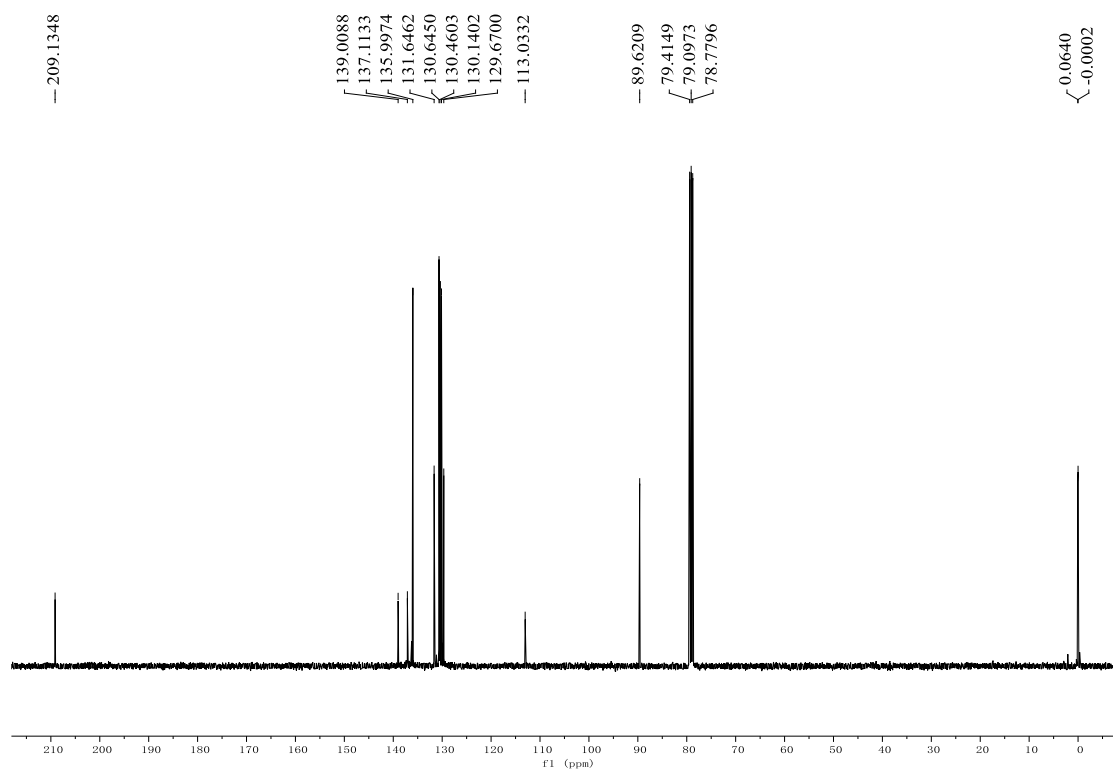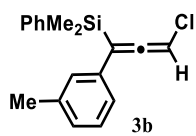



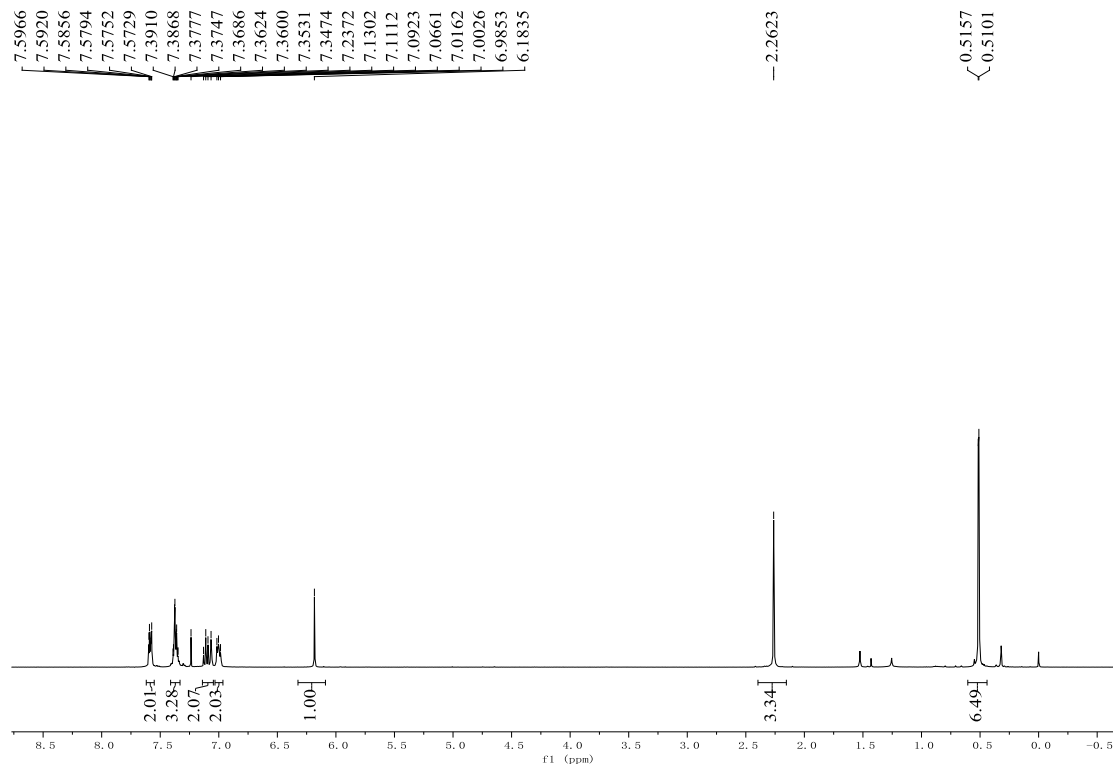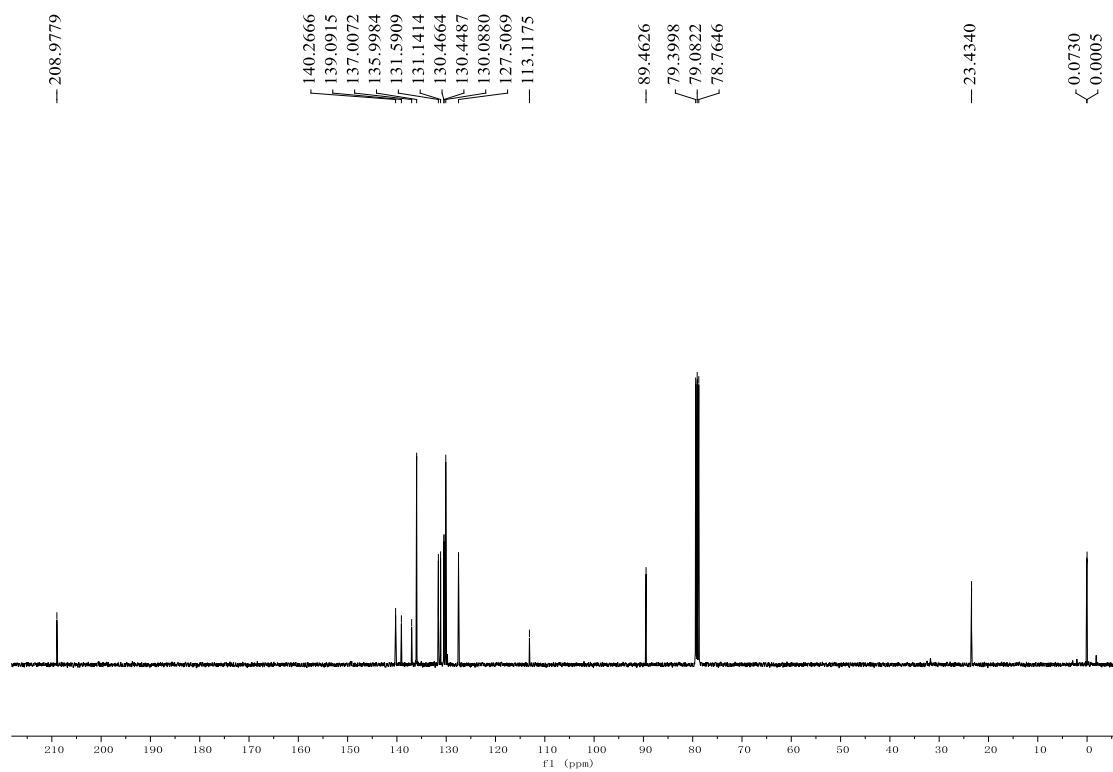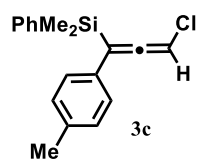

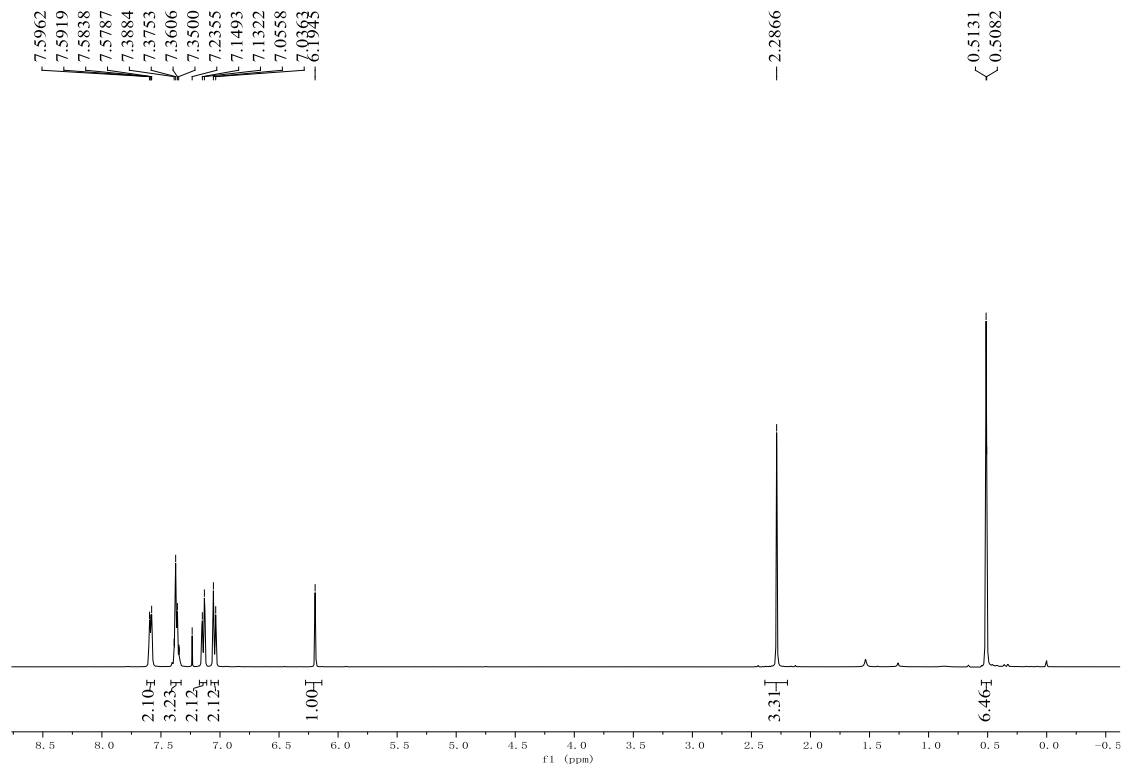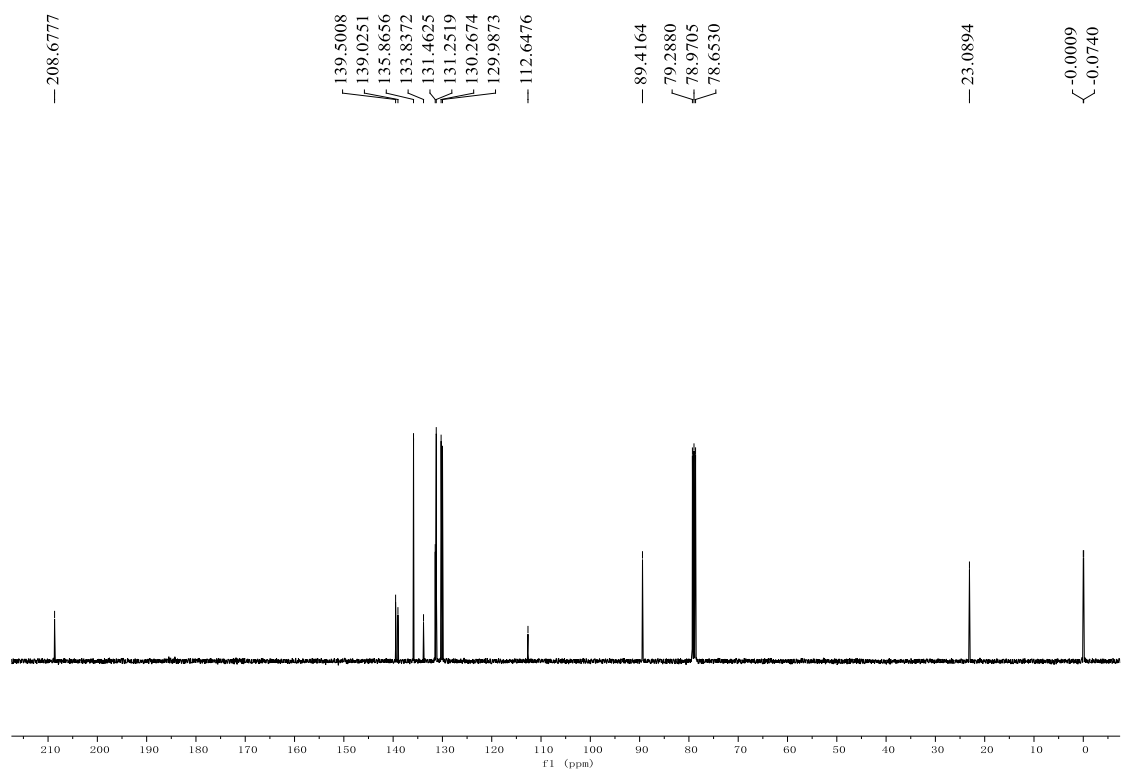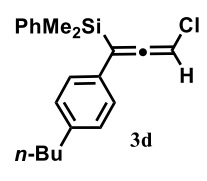

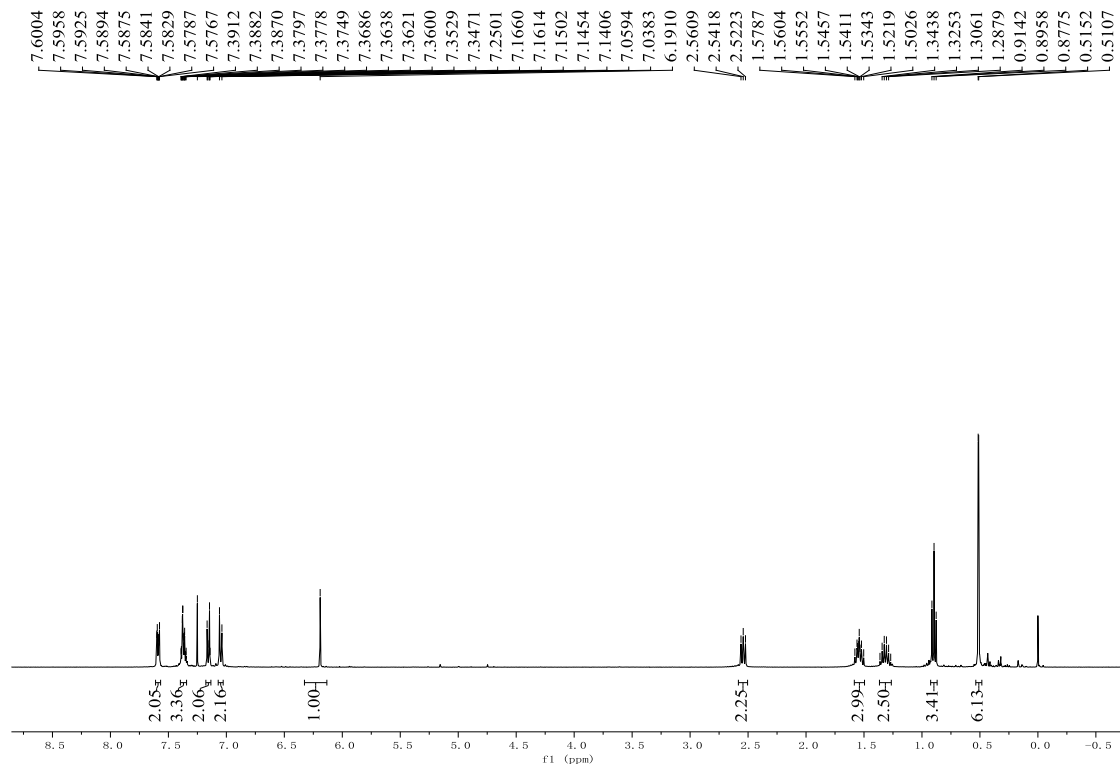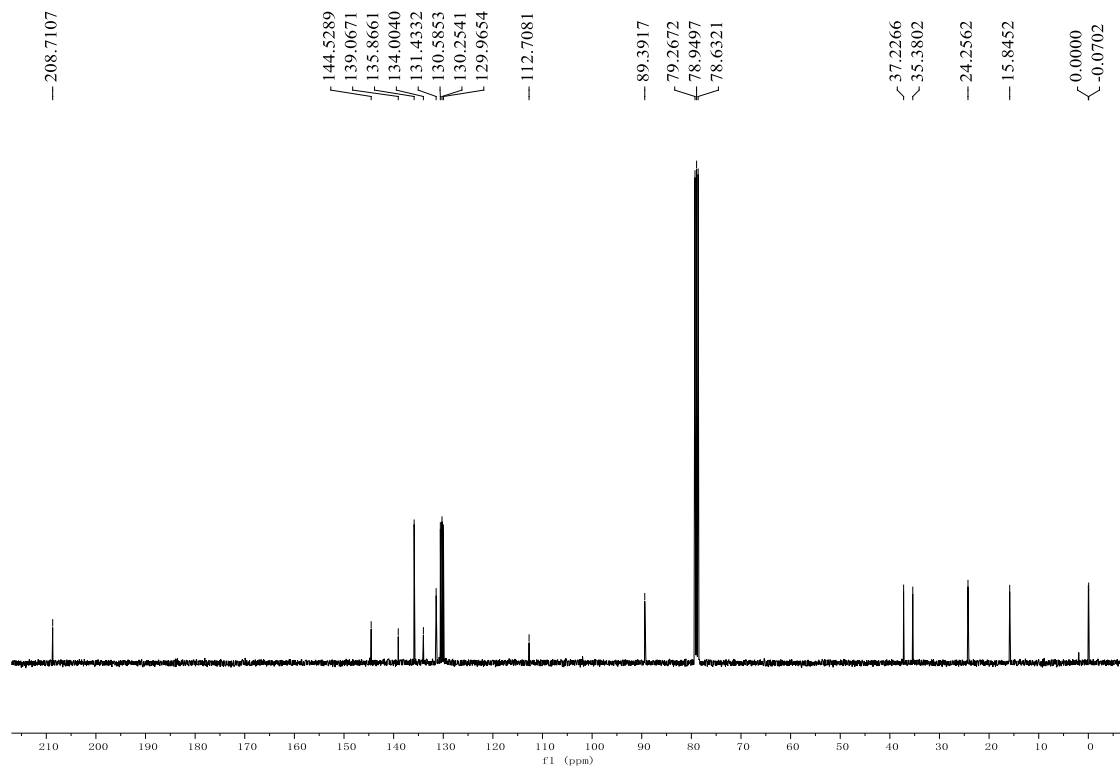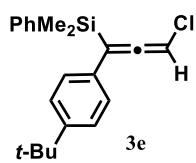

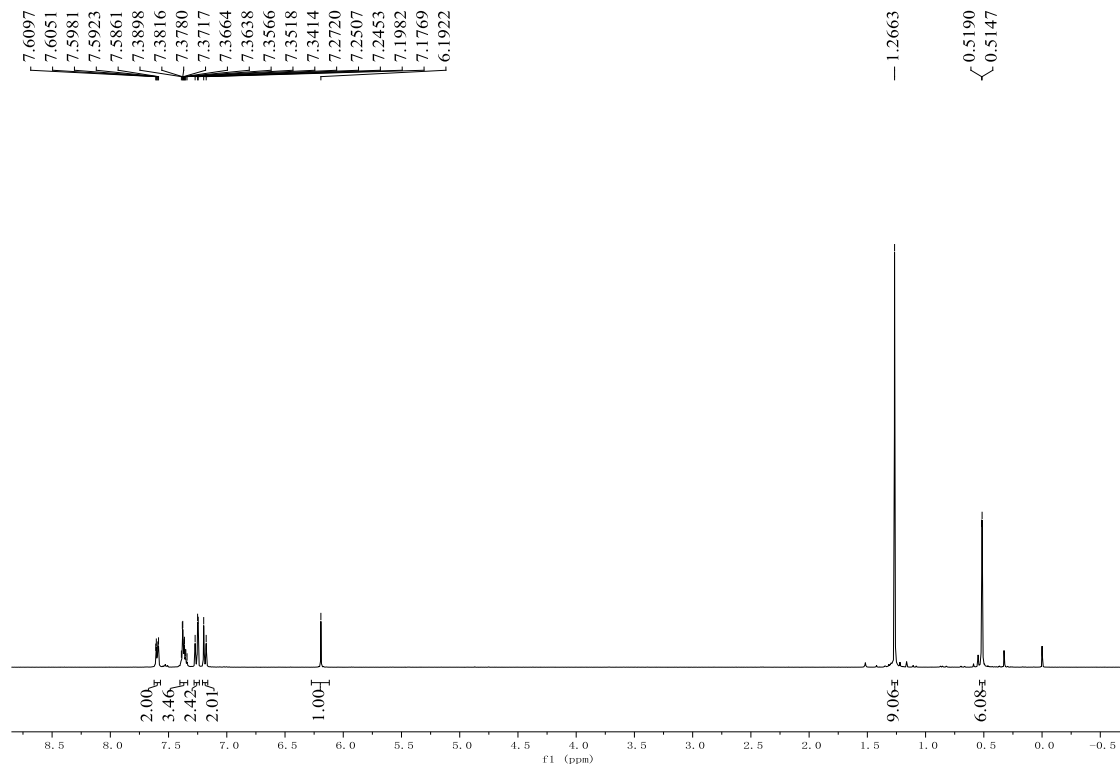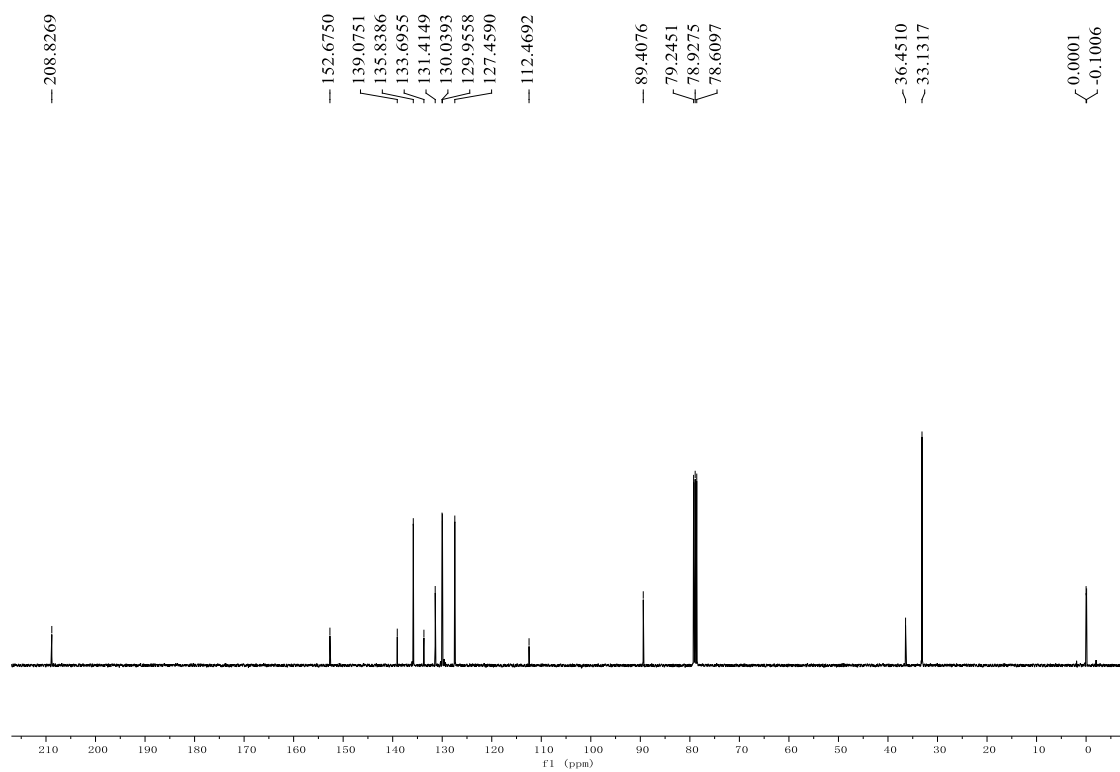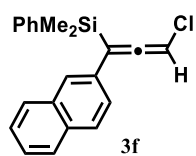

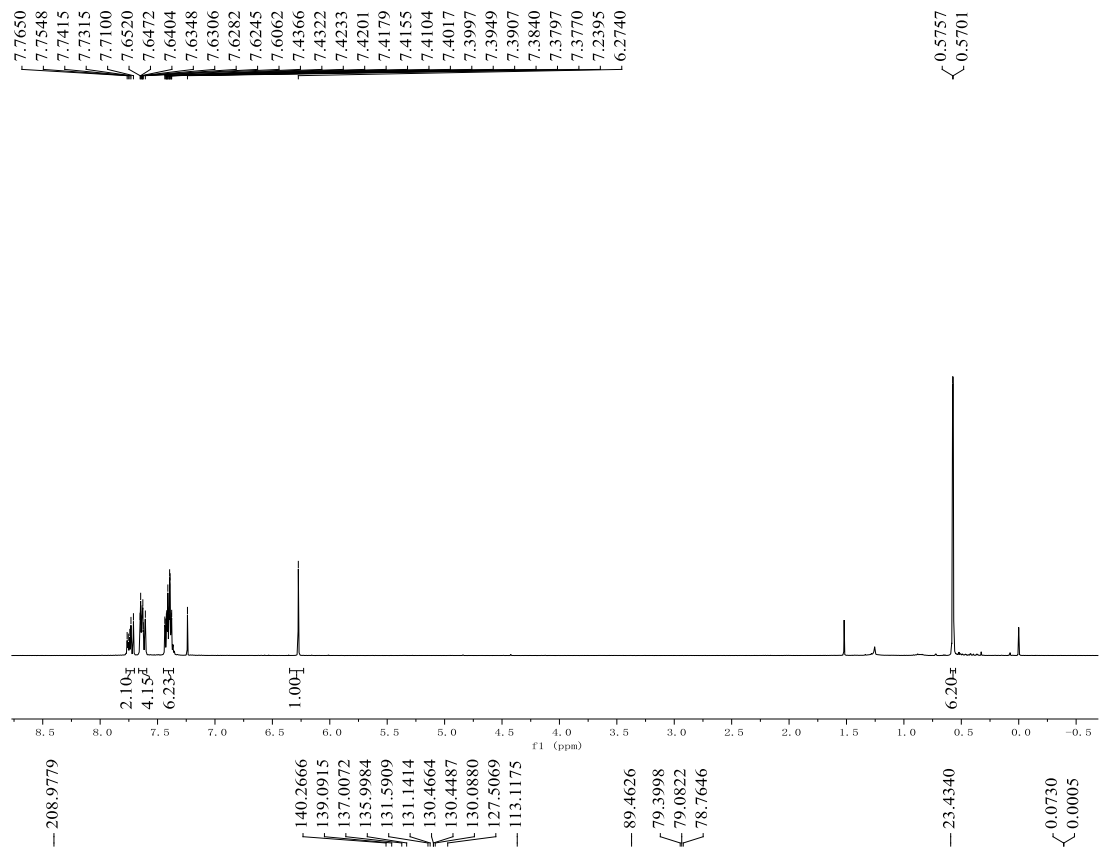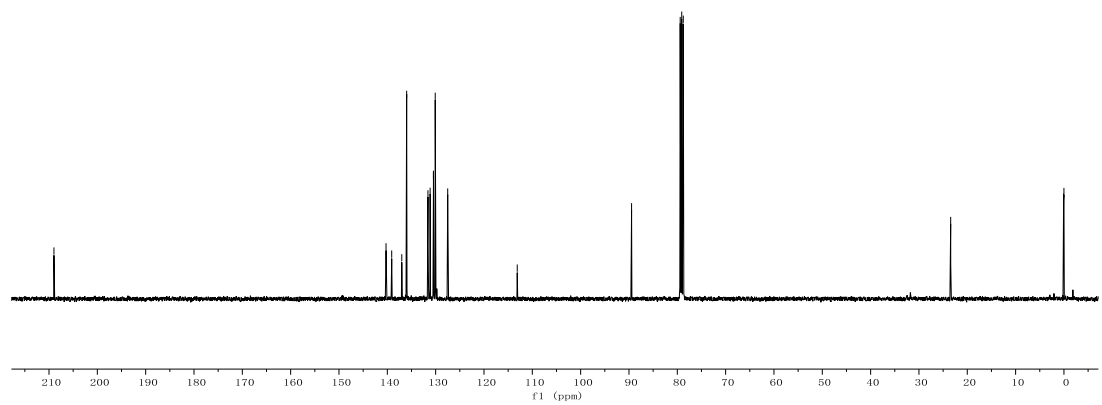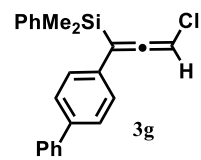

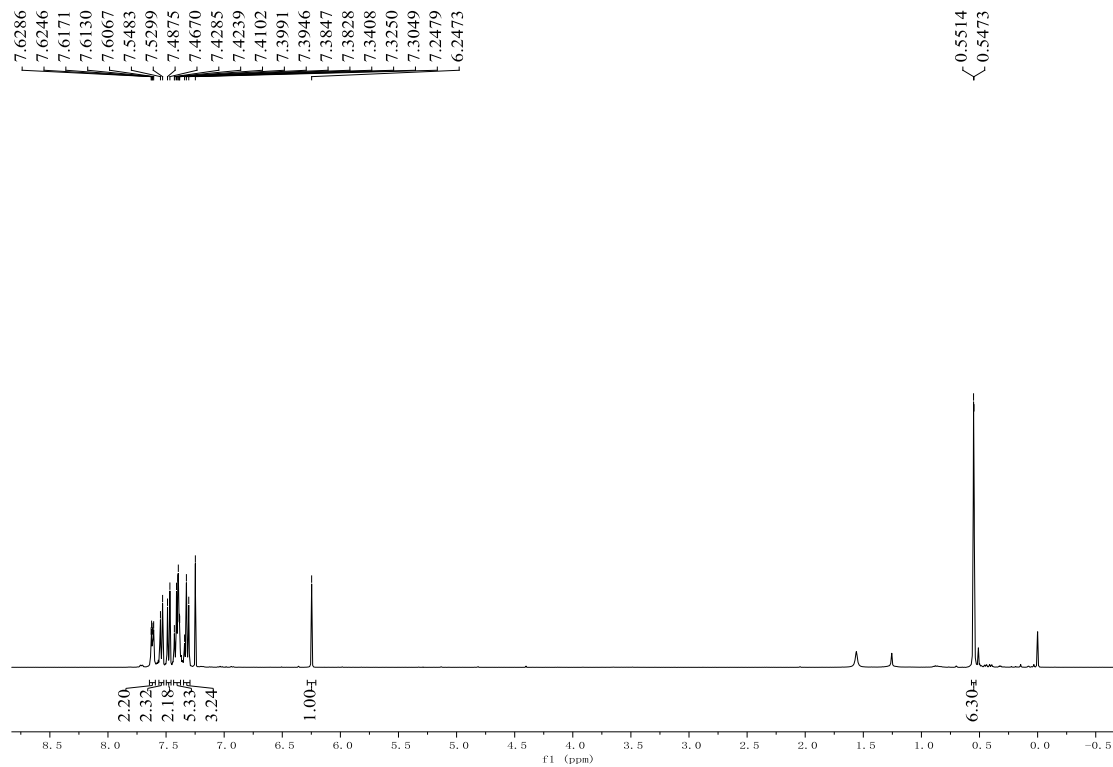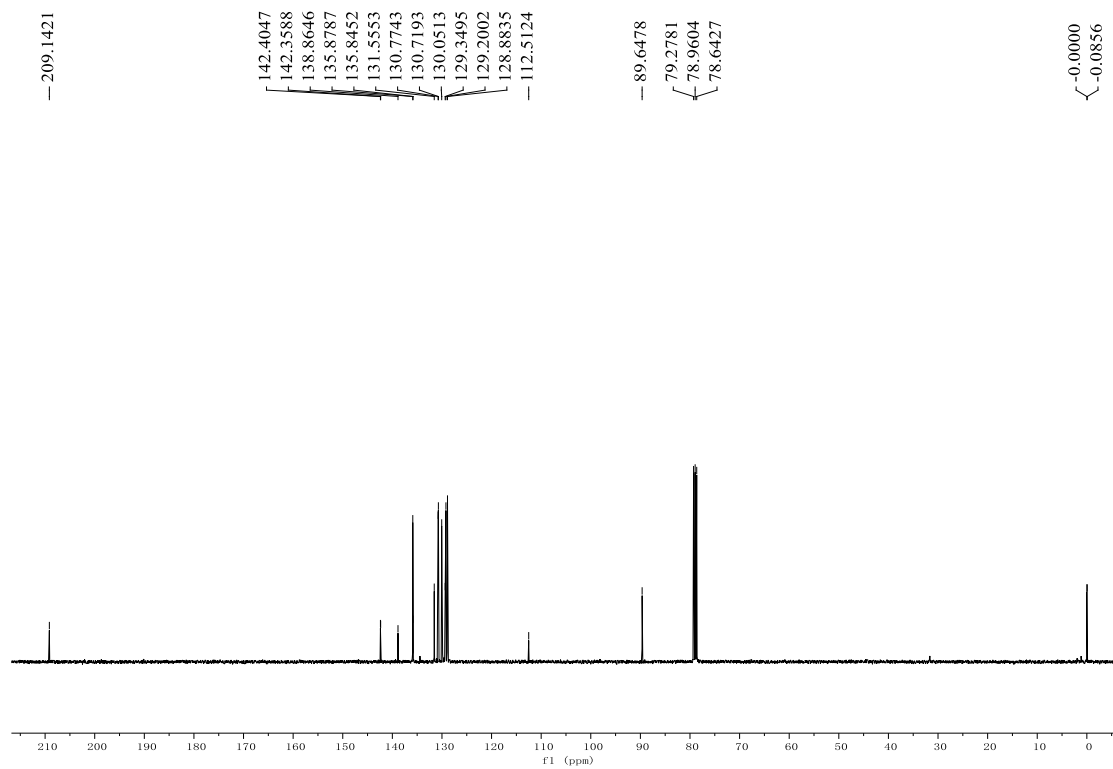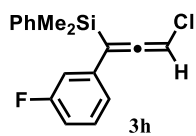

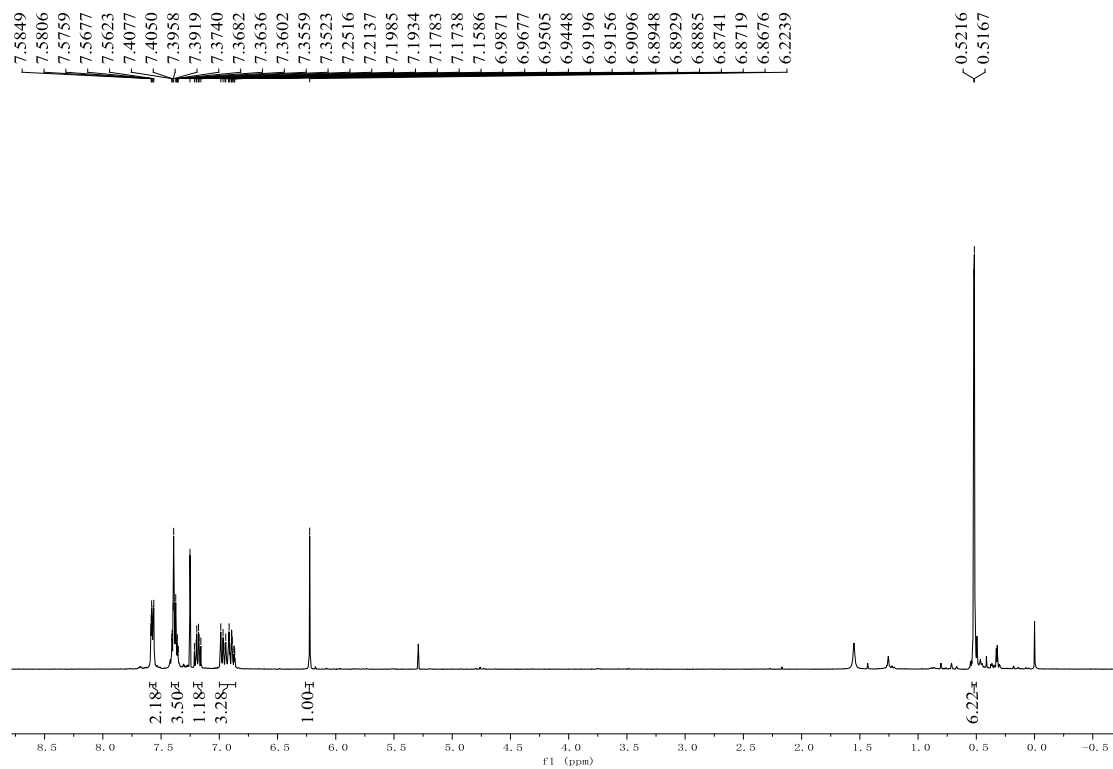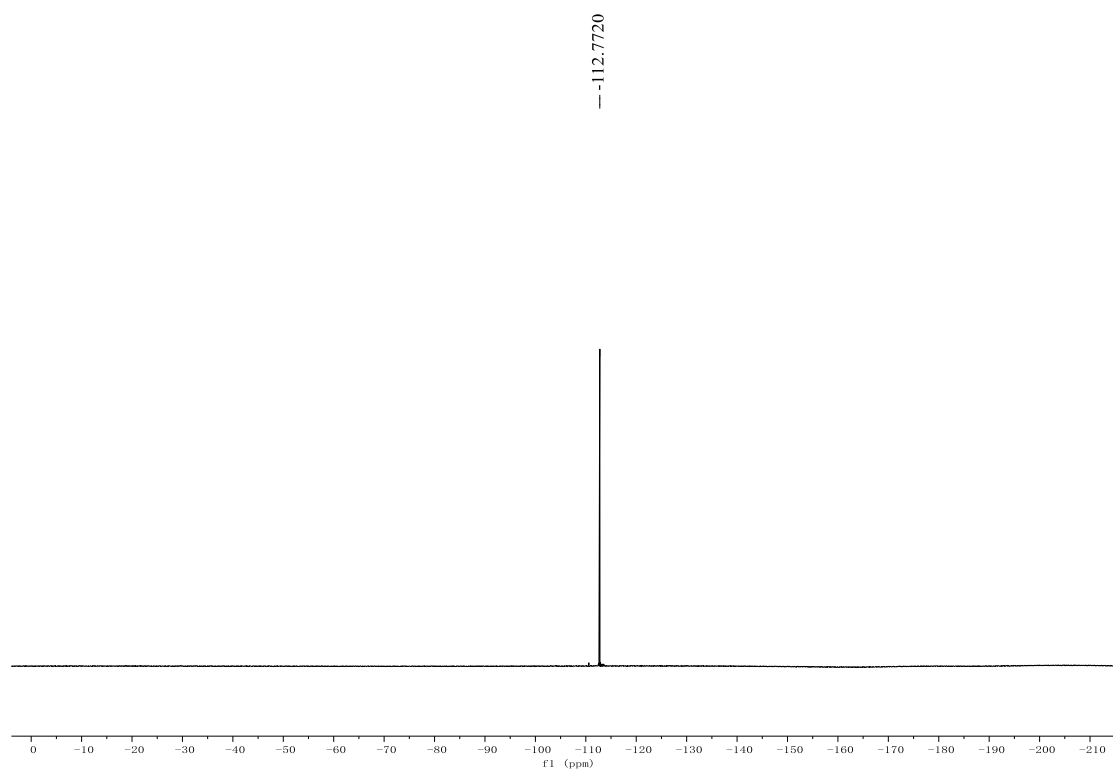

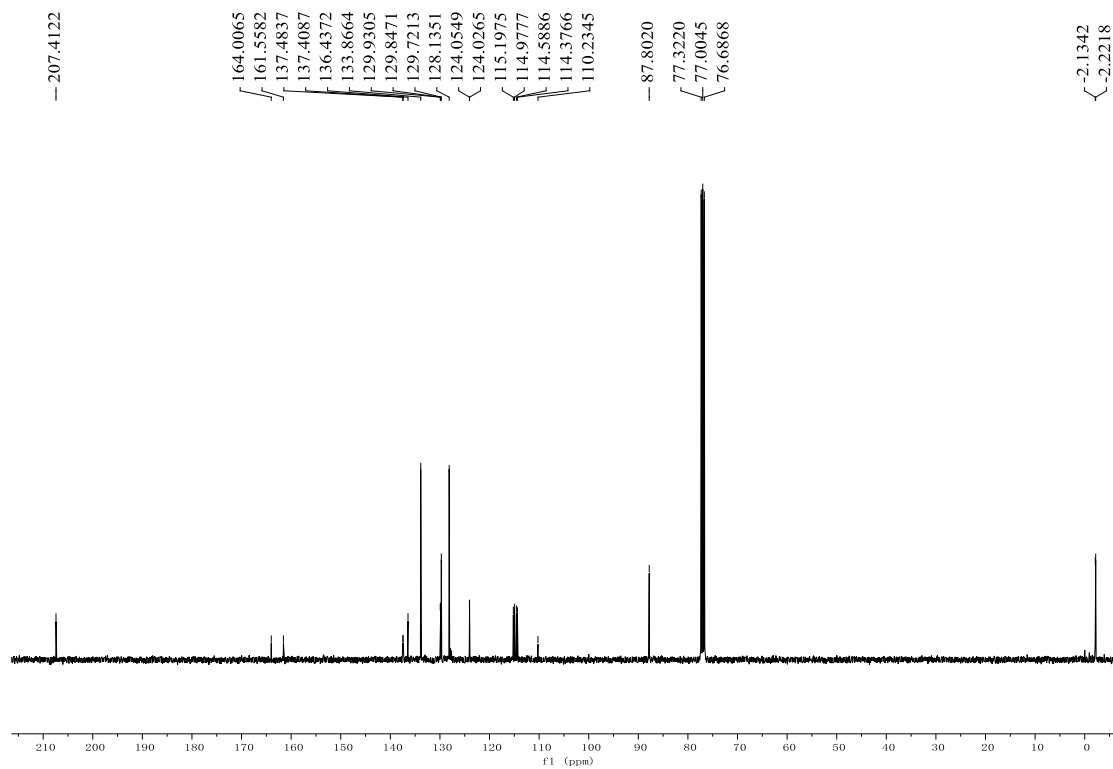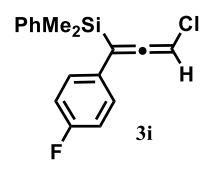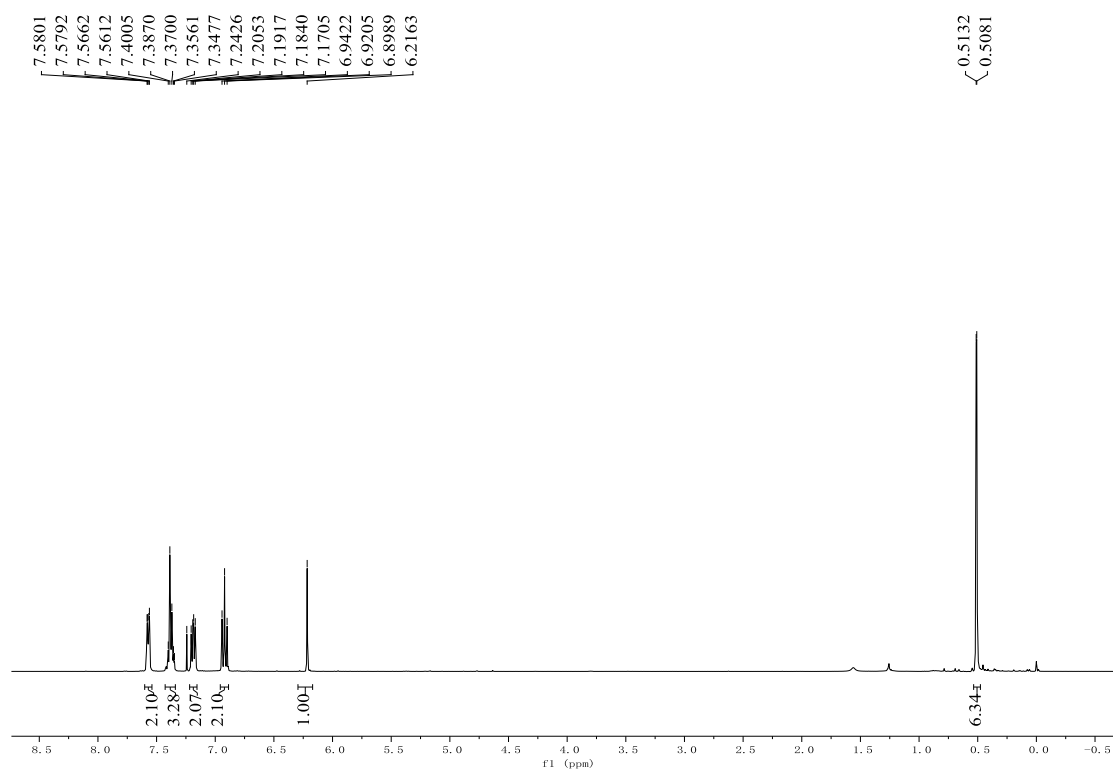



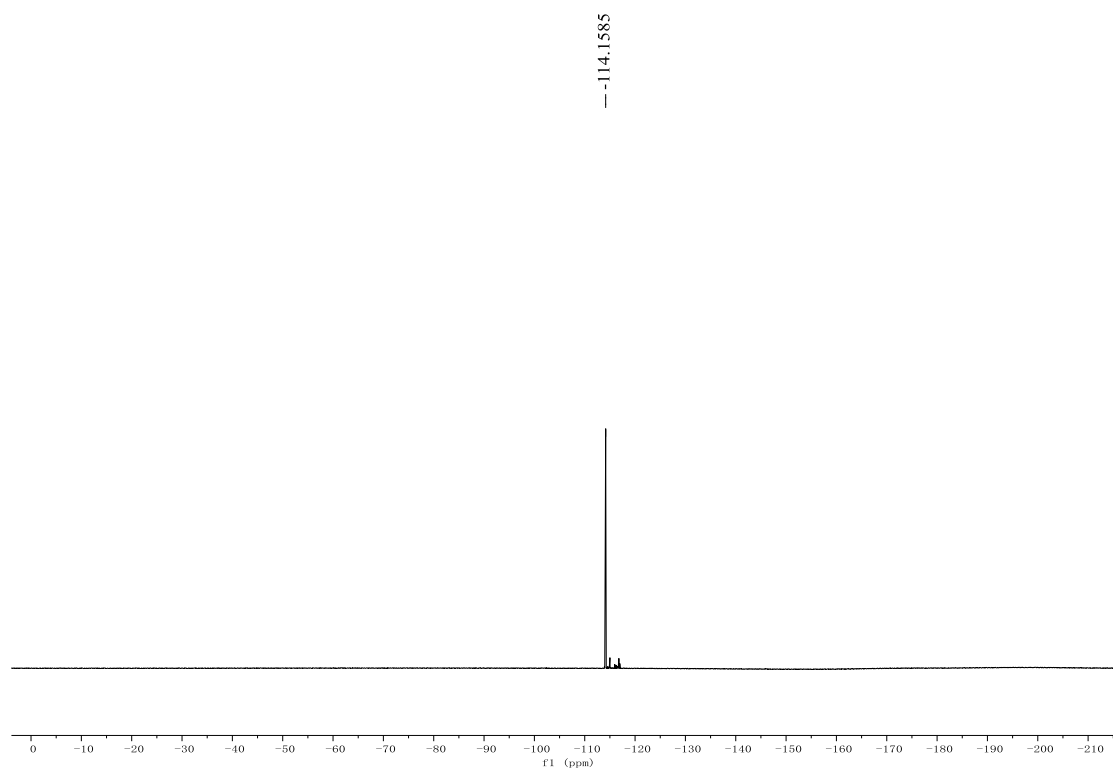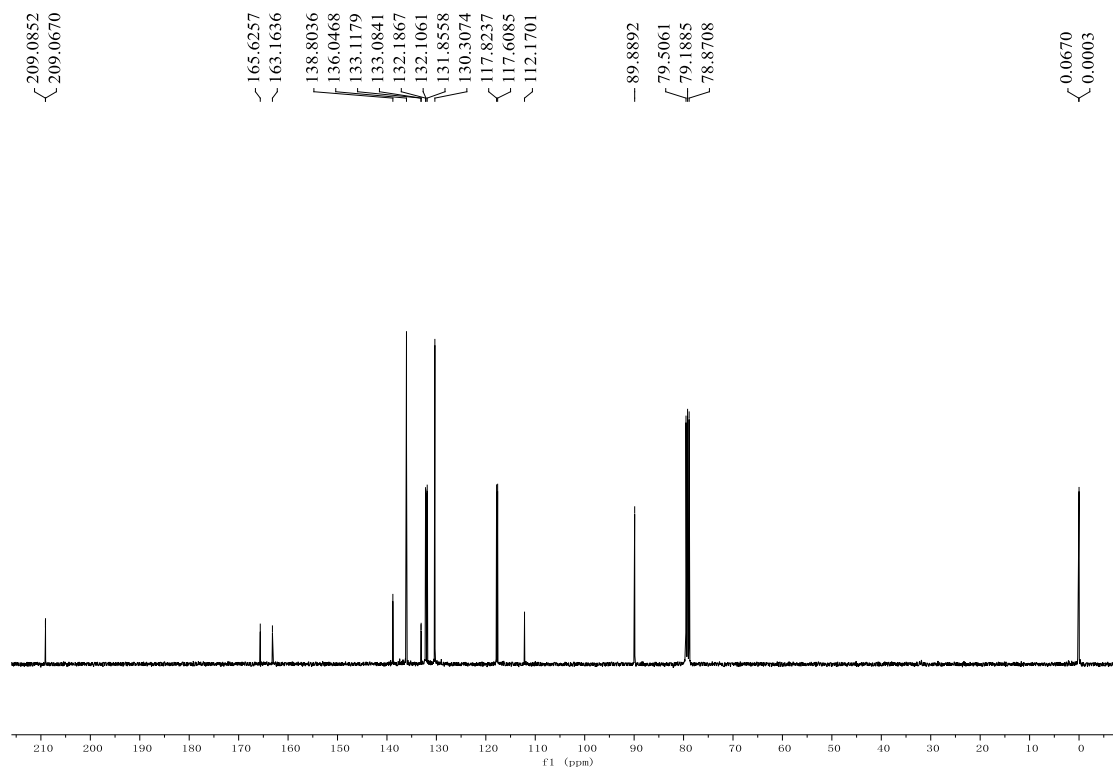

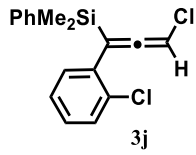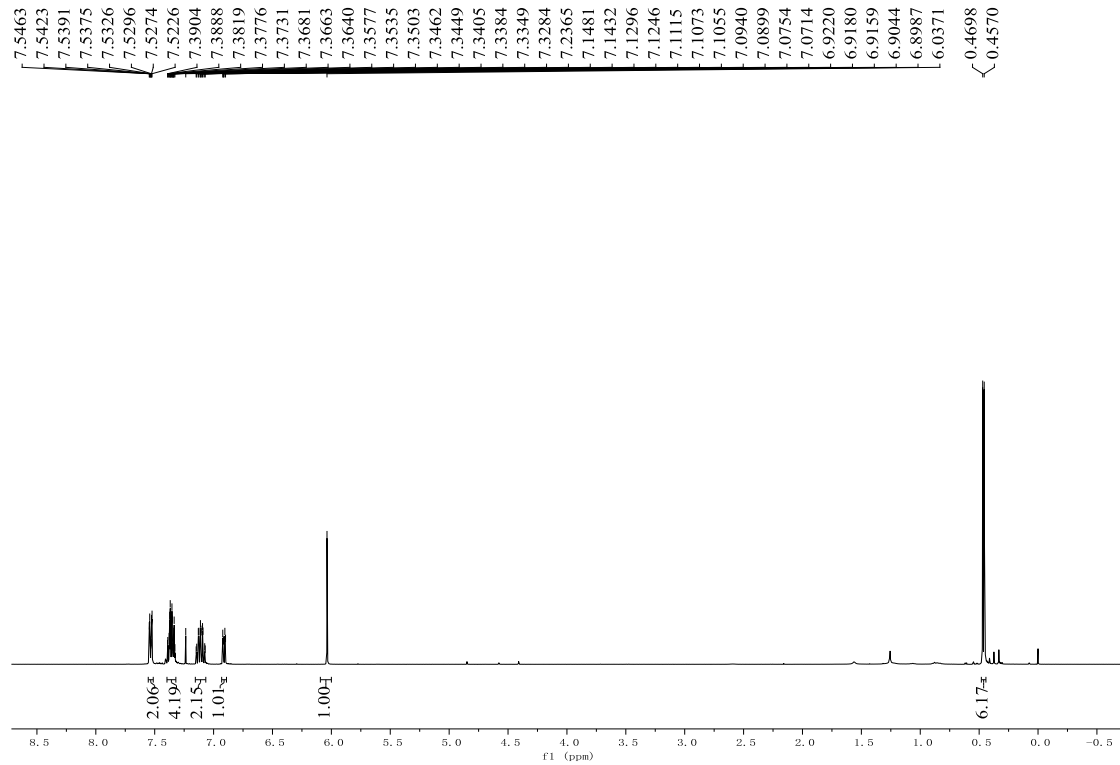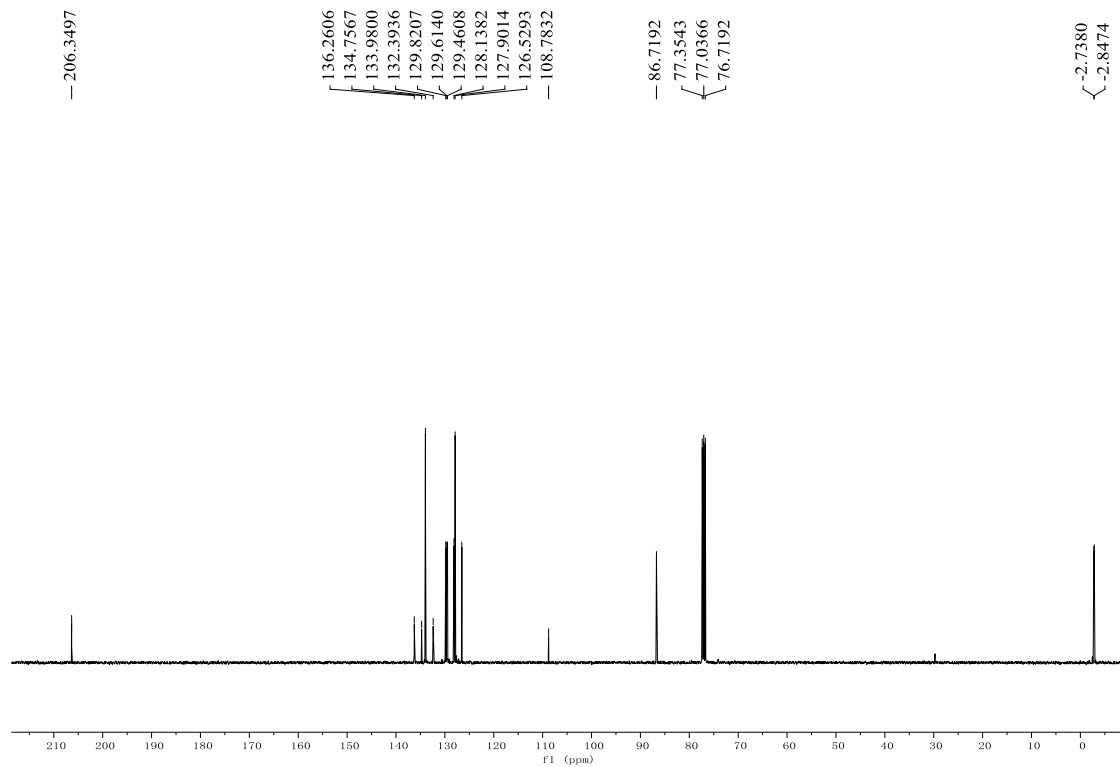

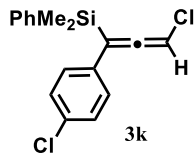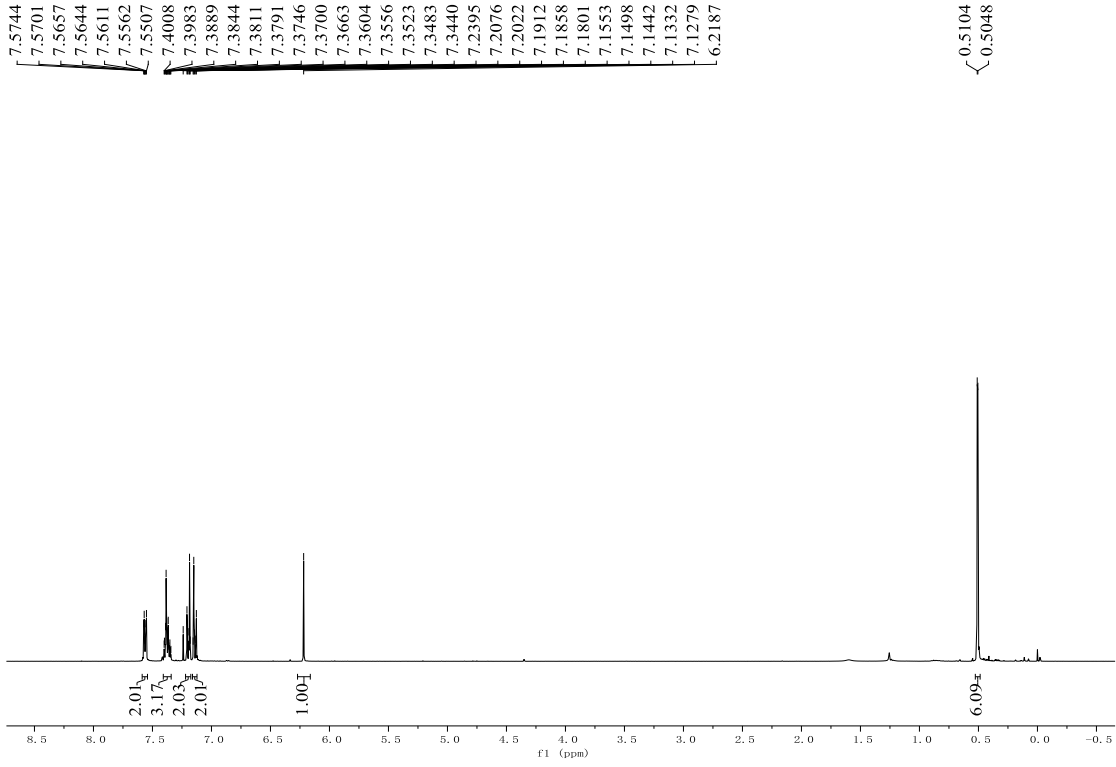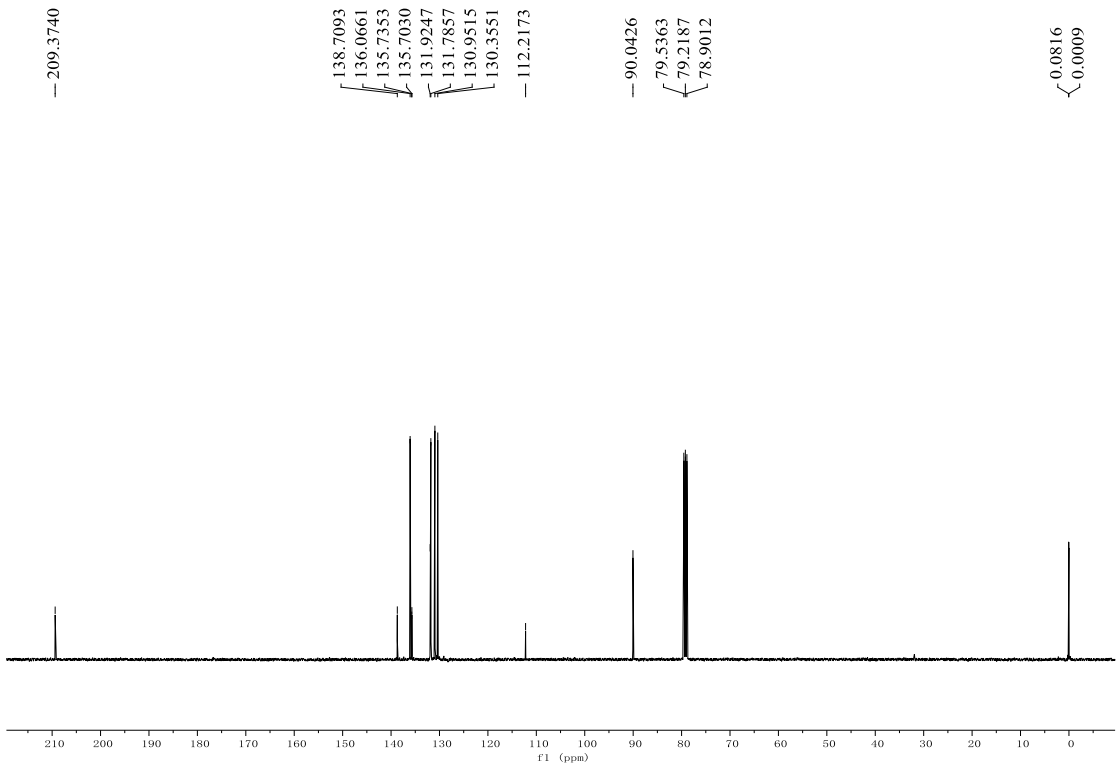

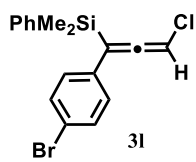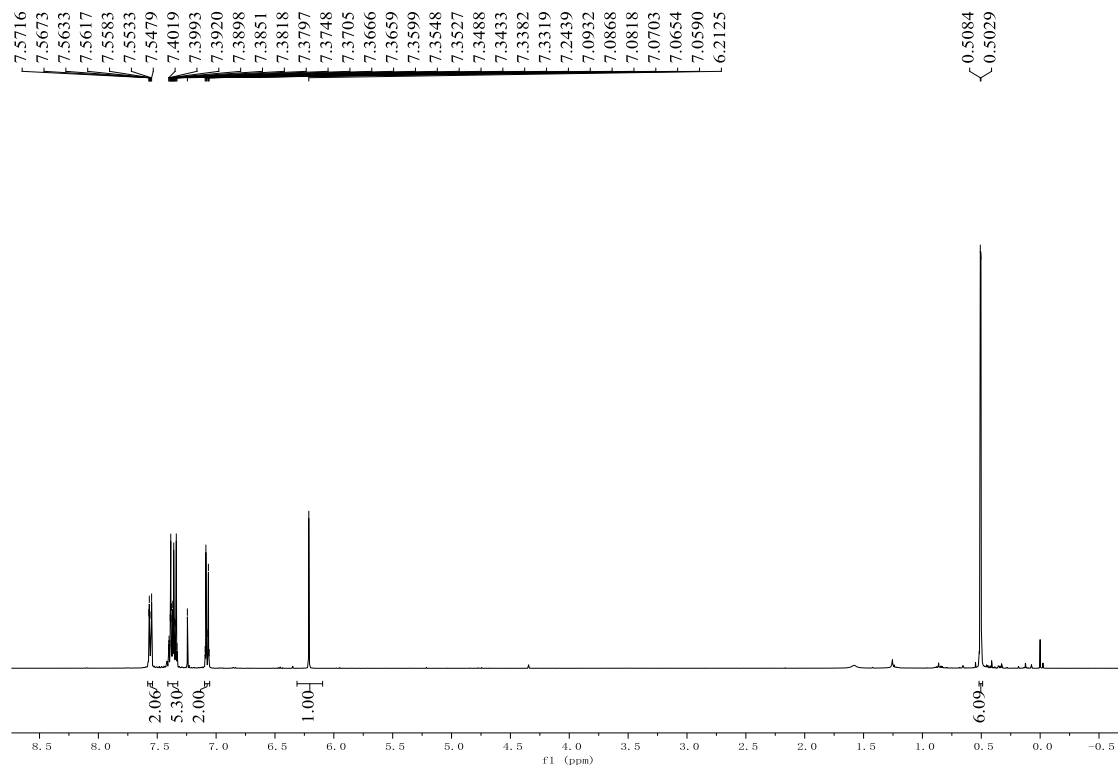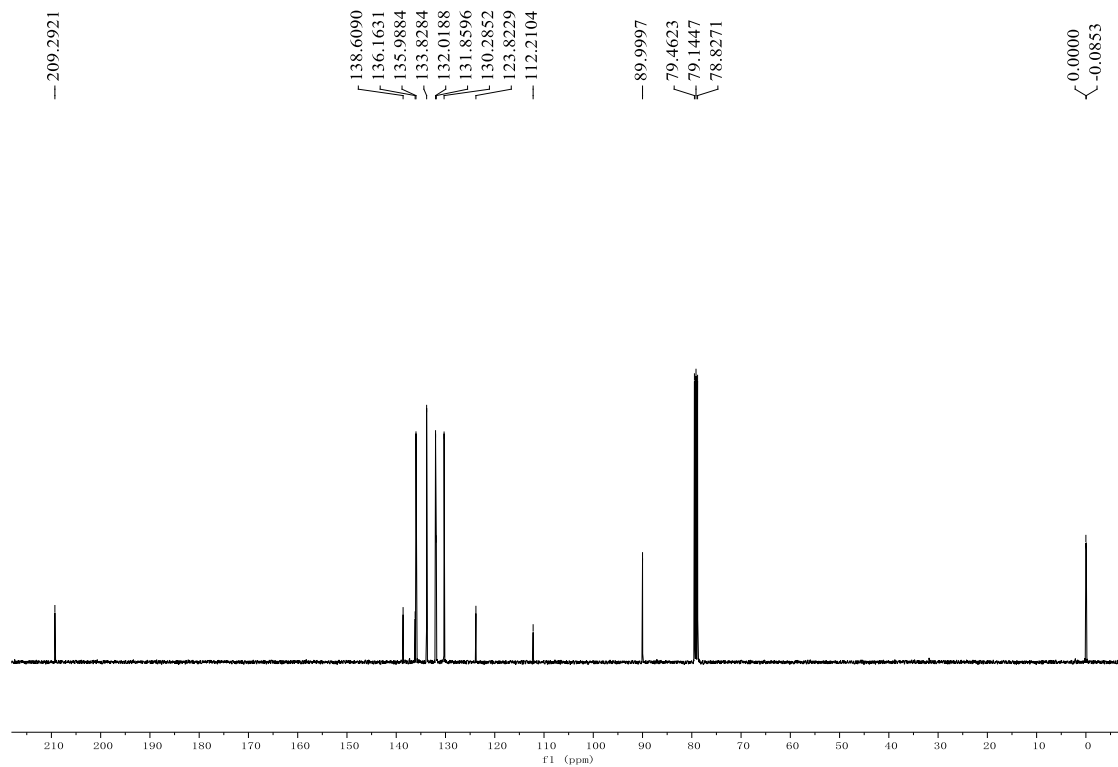



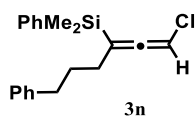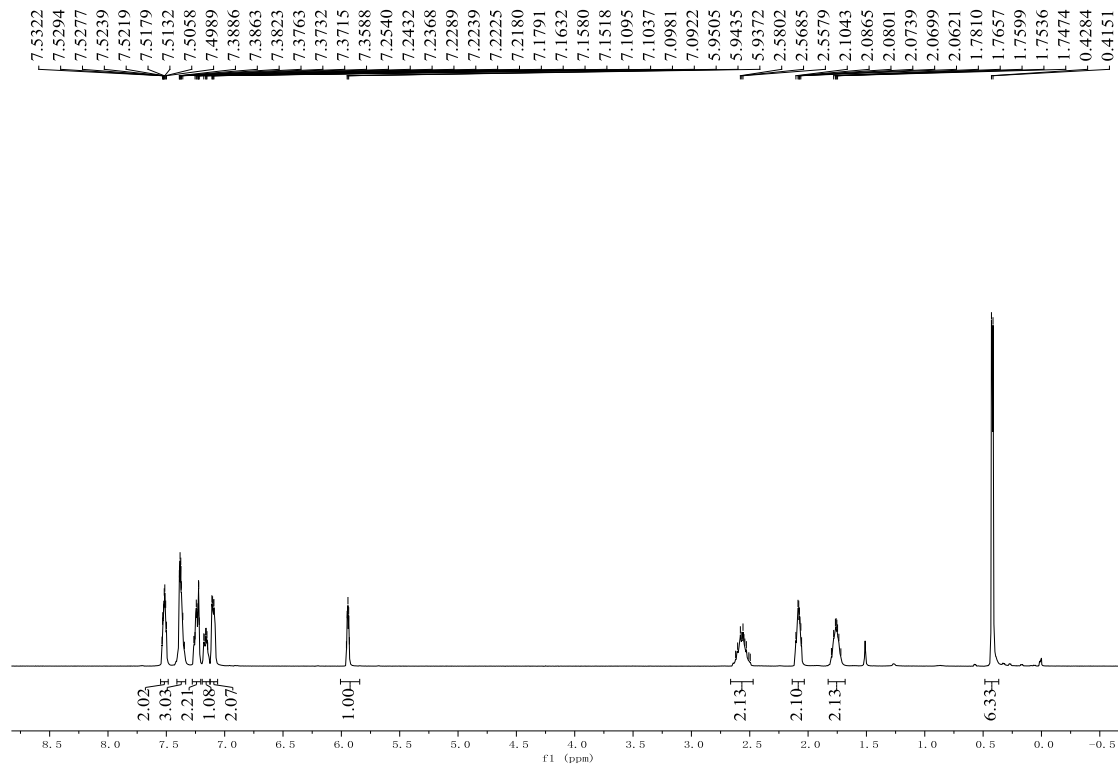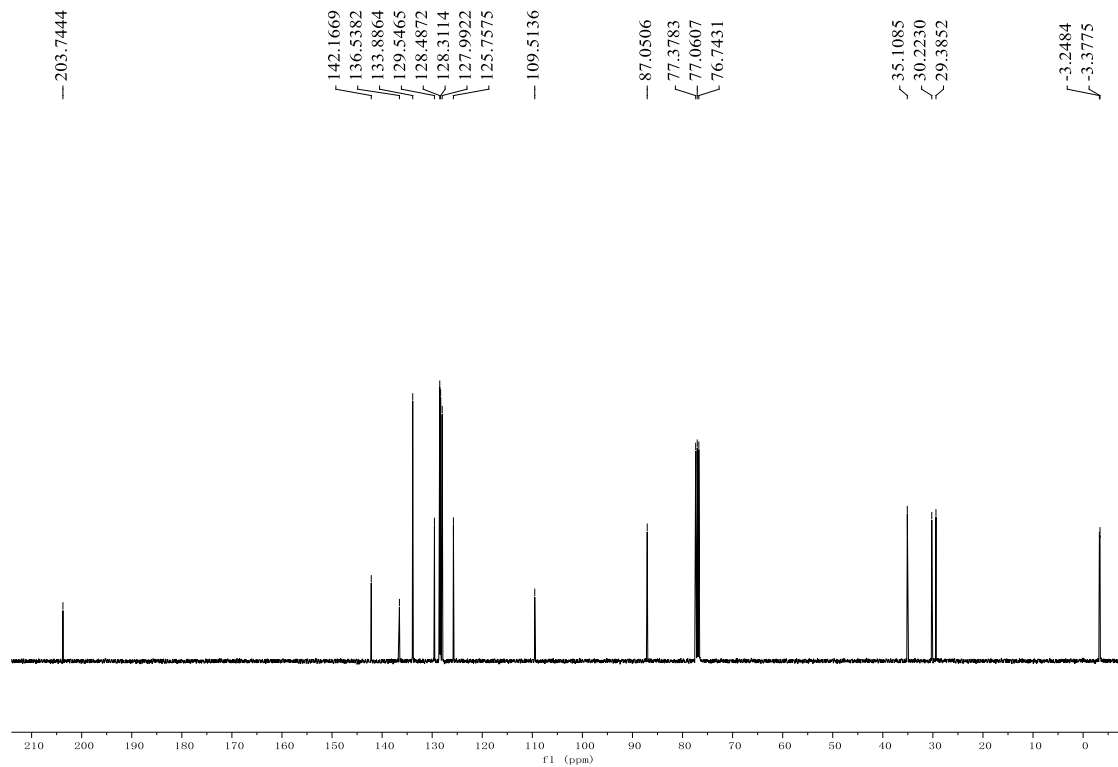

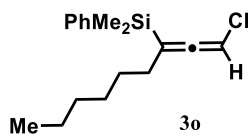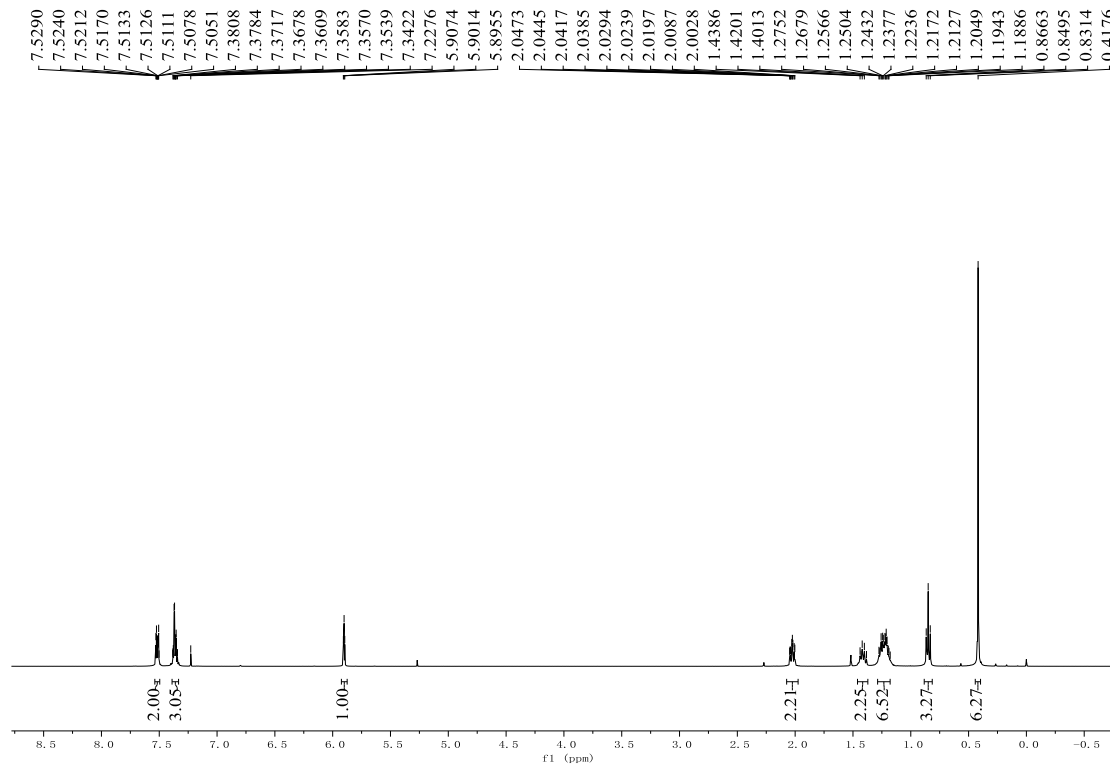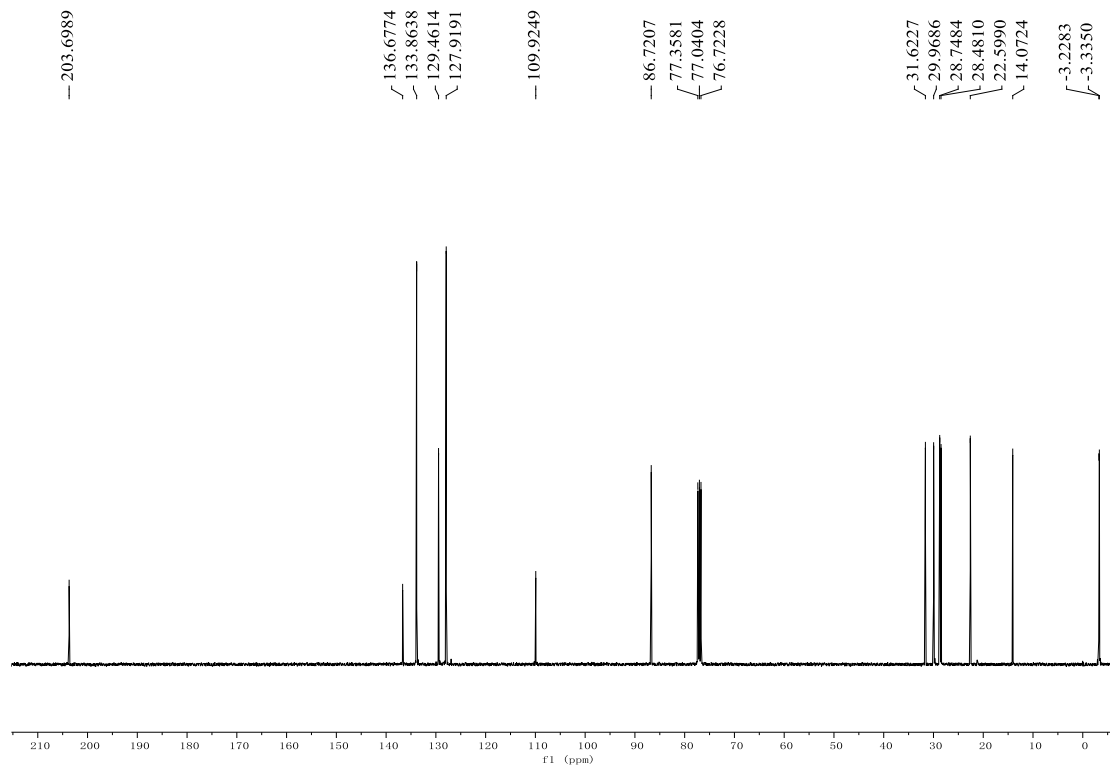

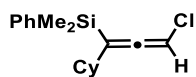

3p

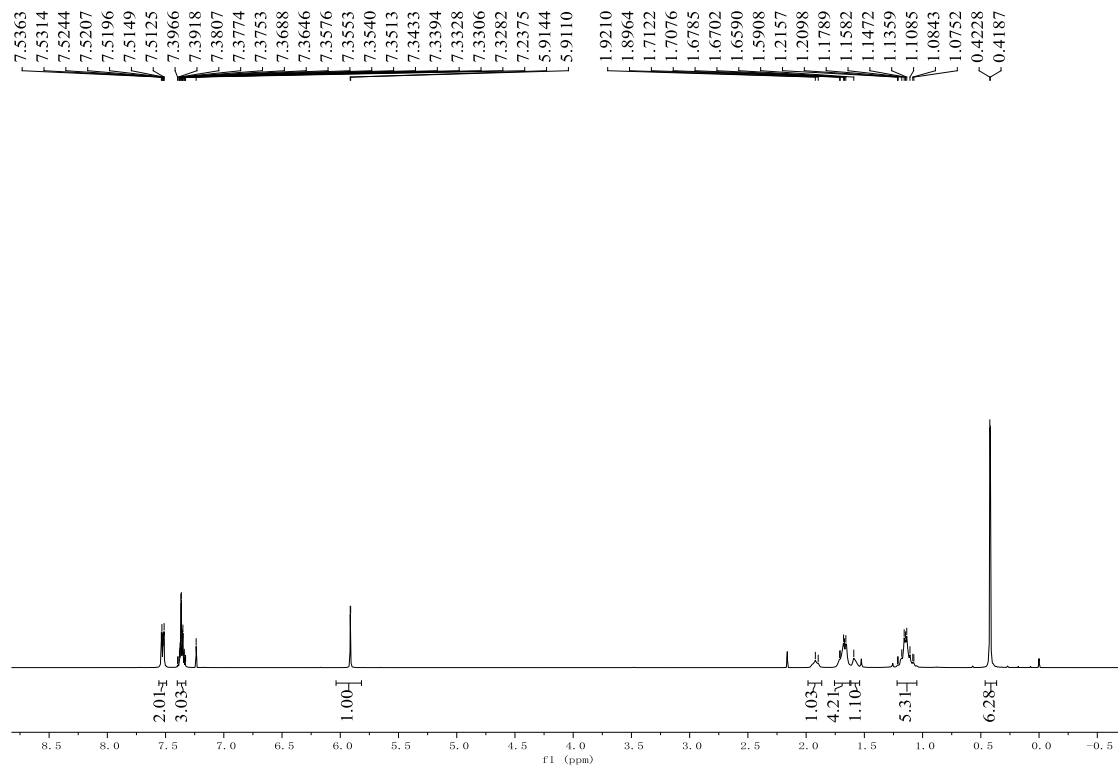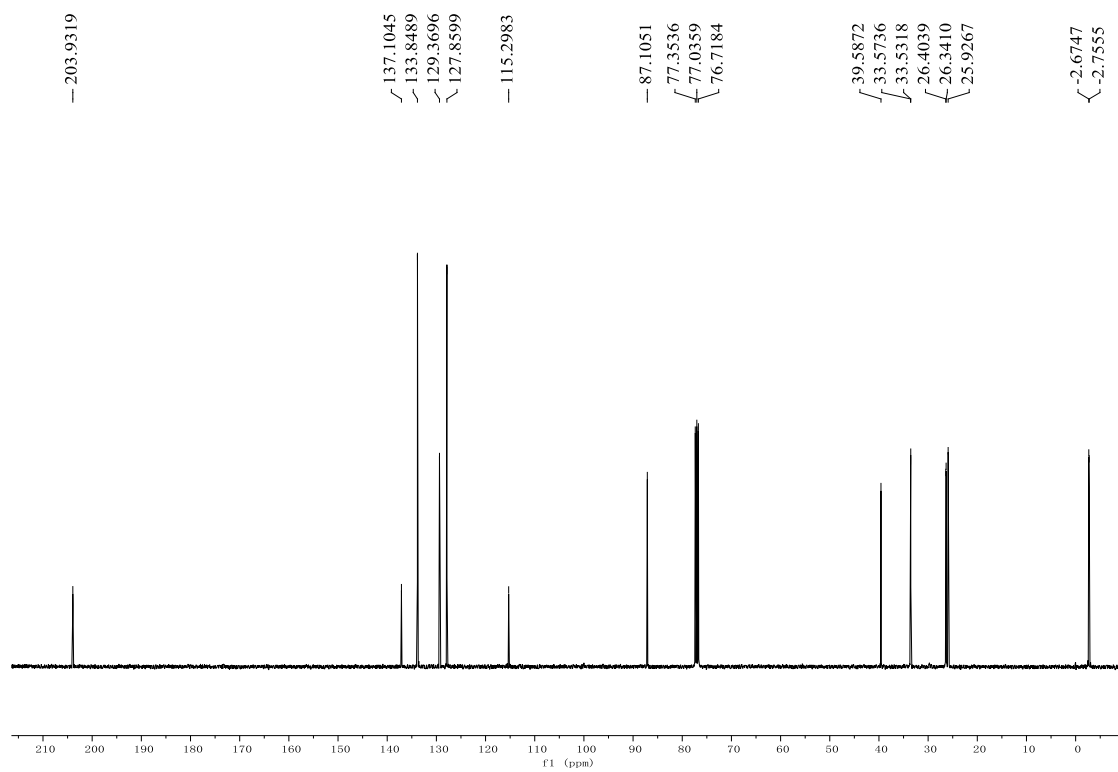



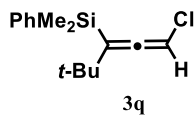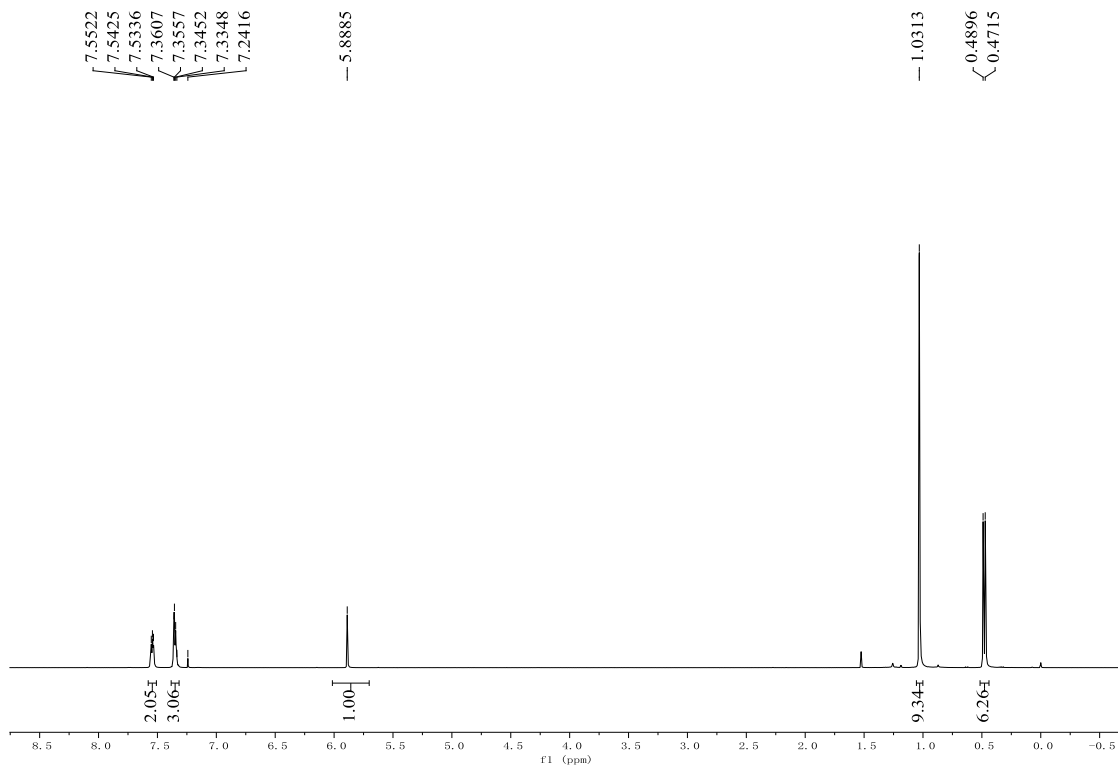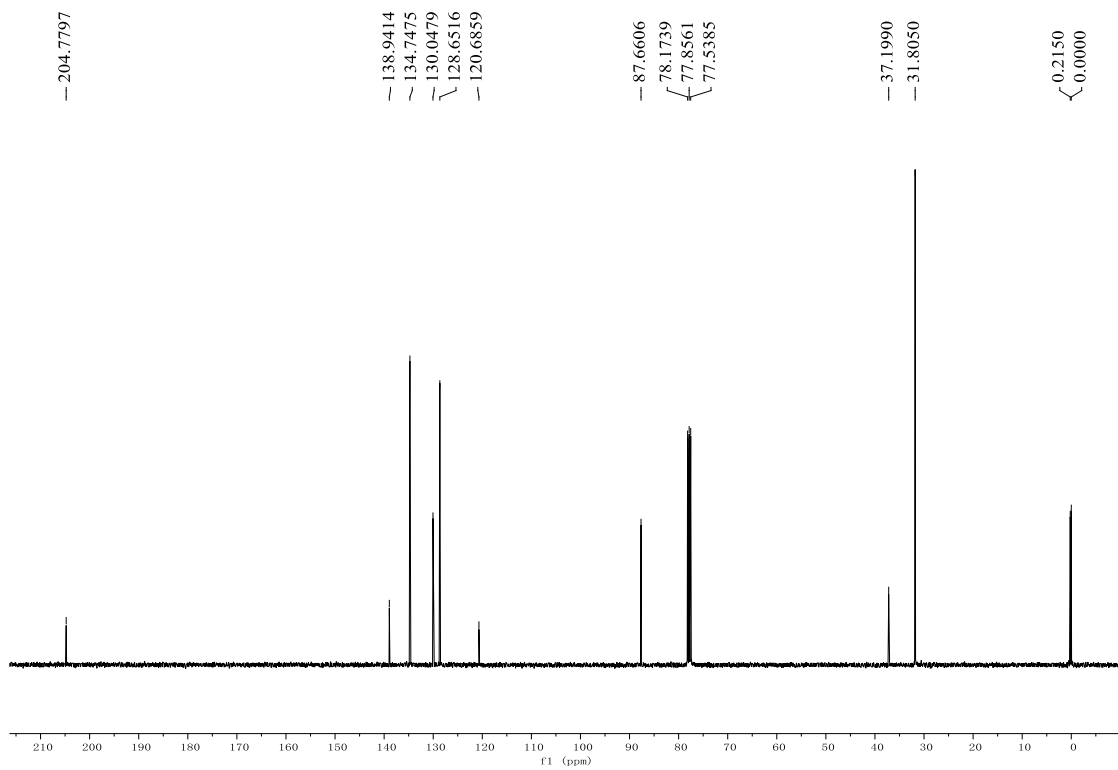

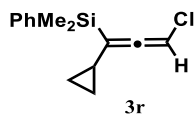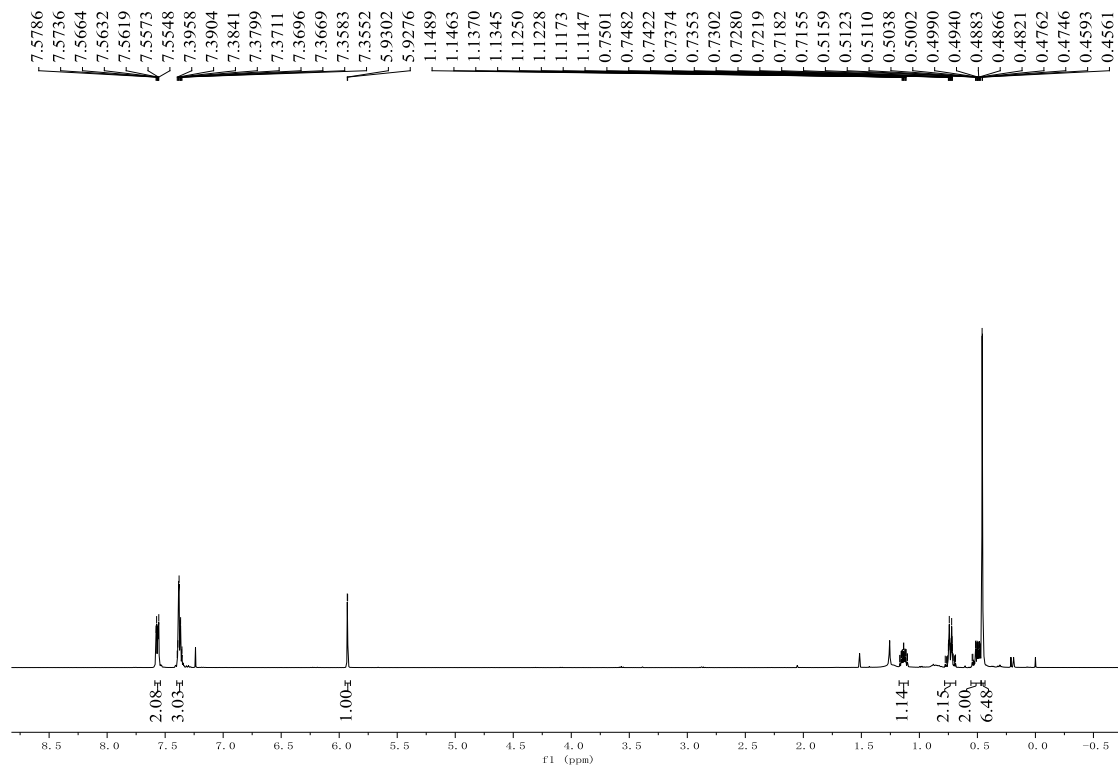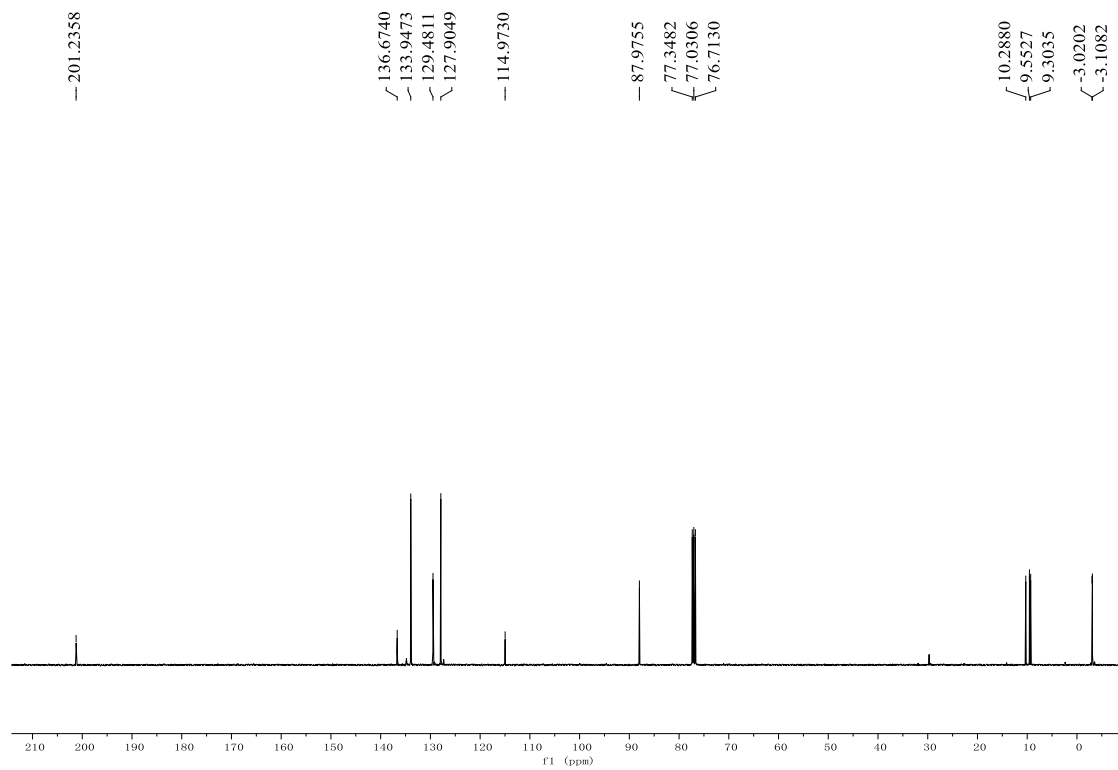

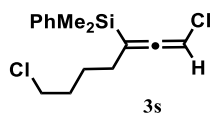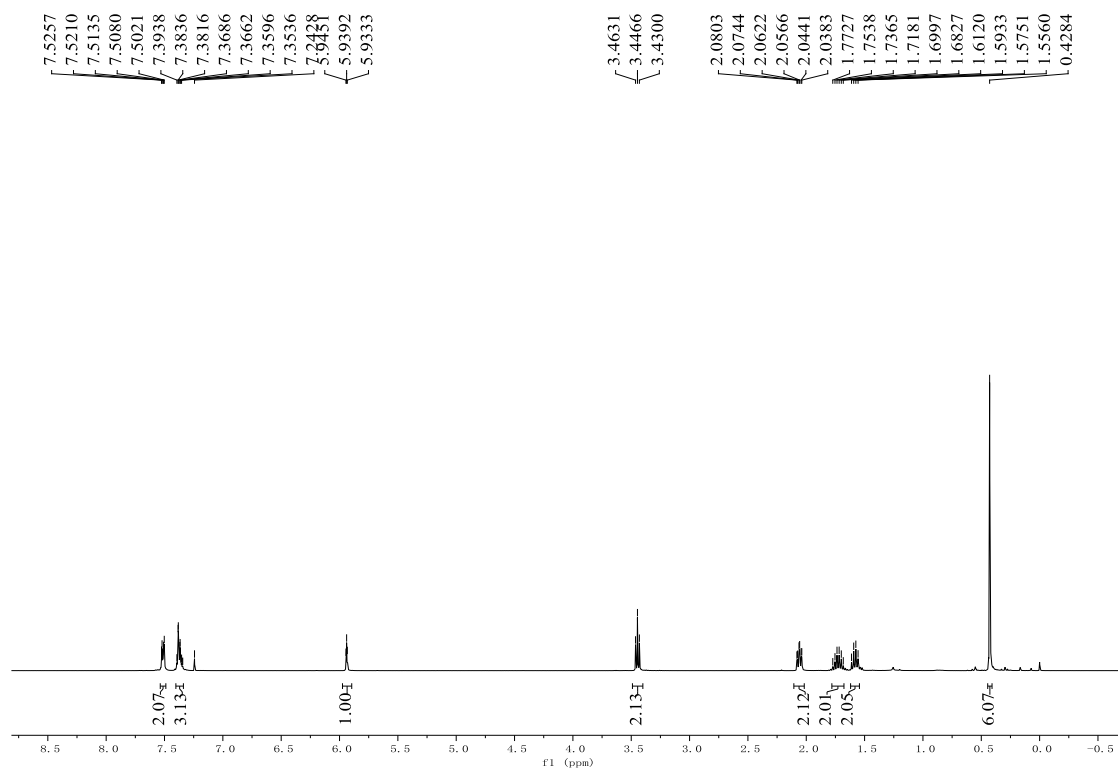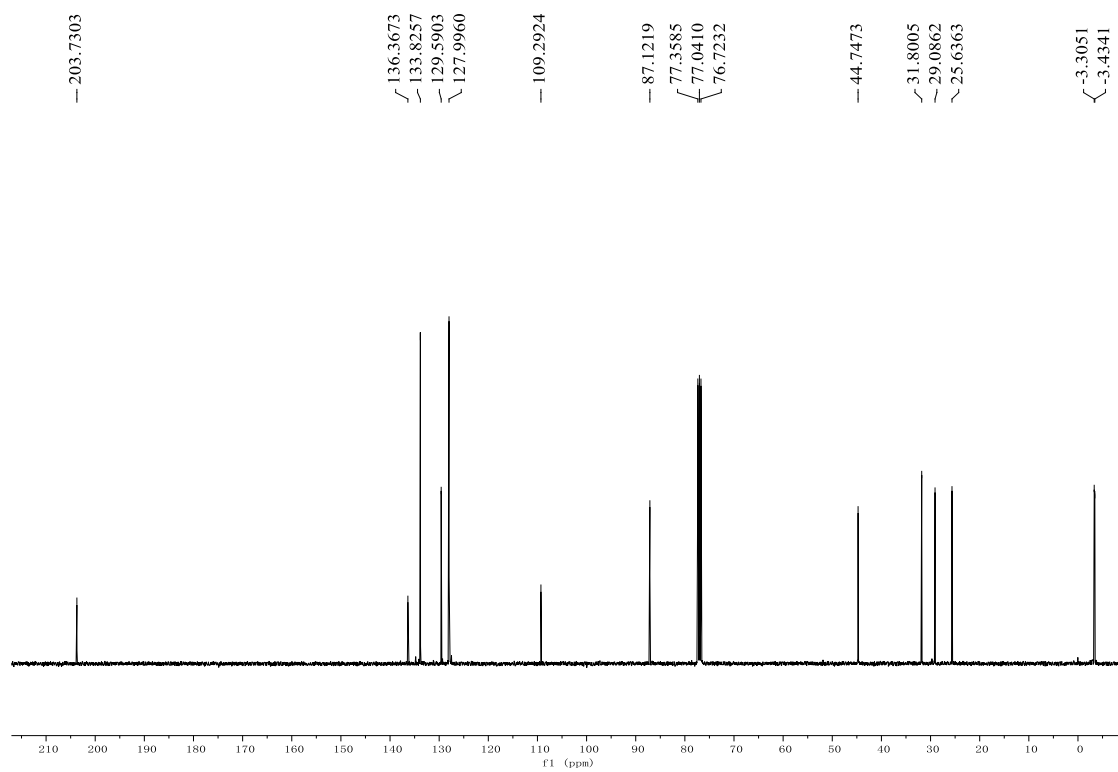

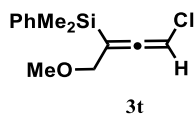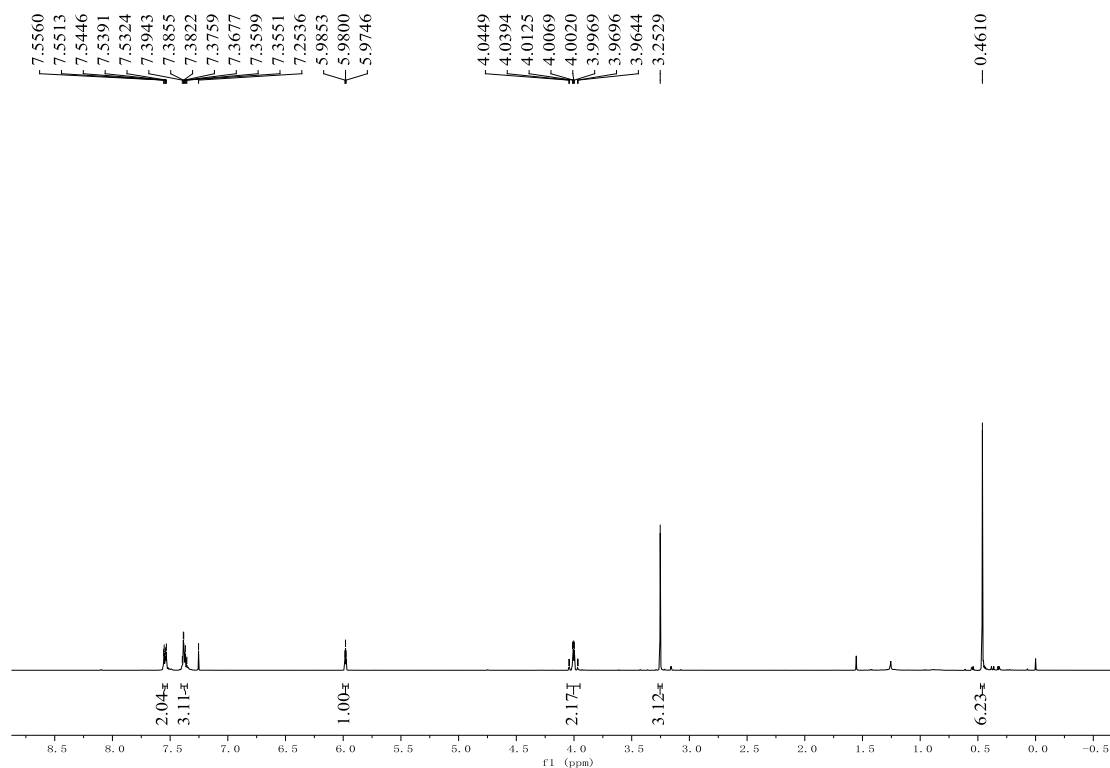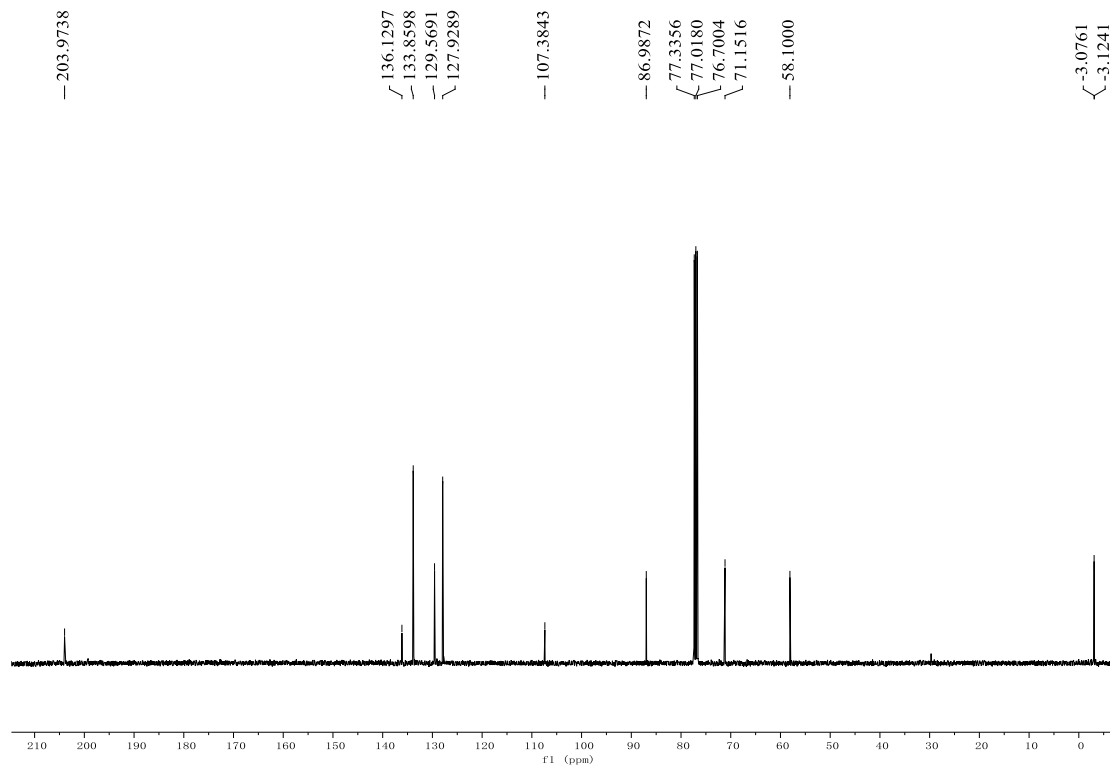

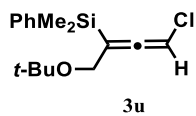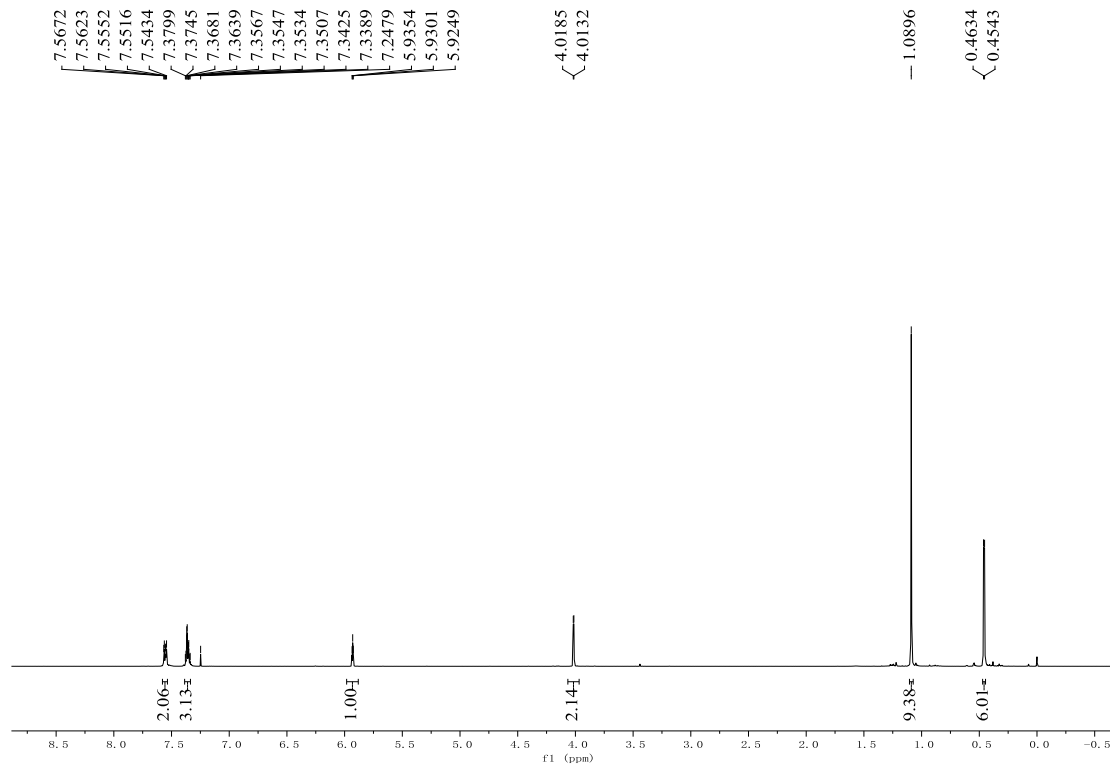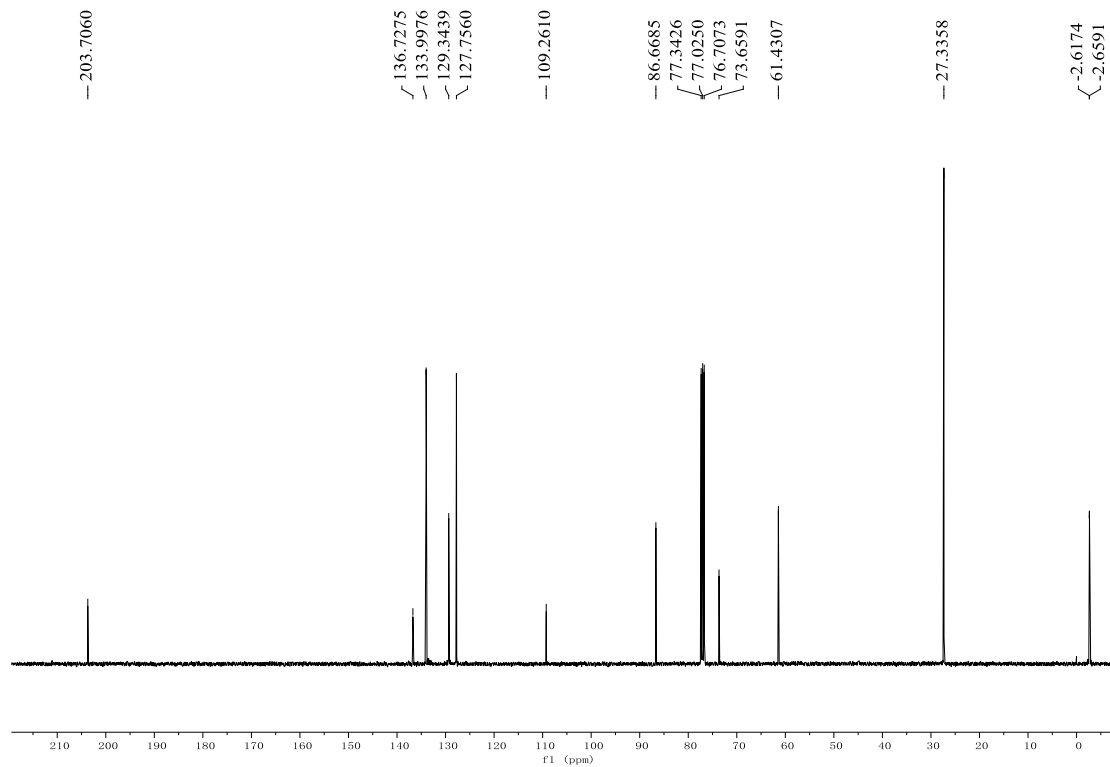



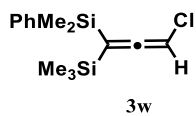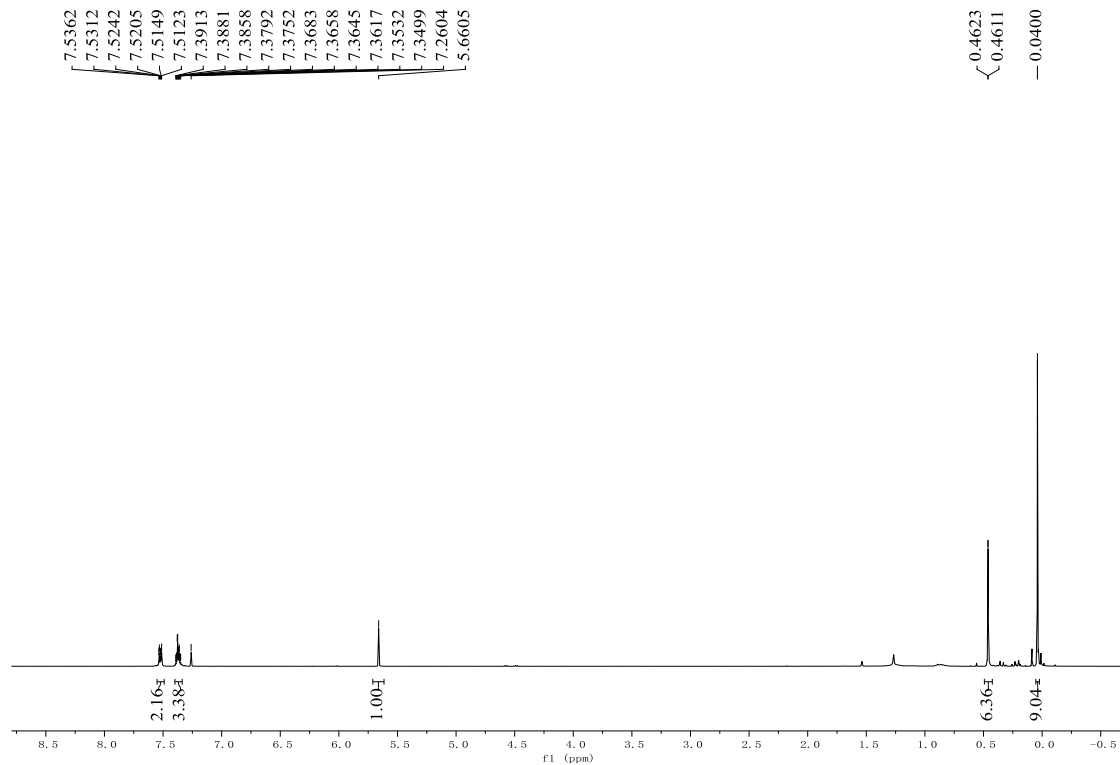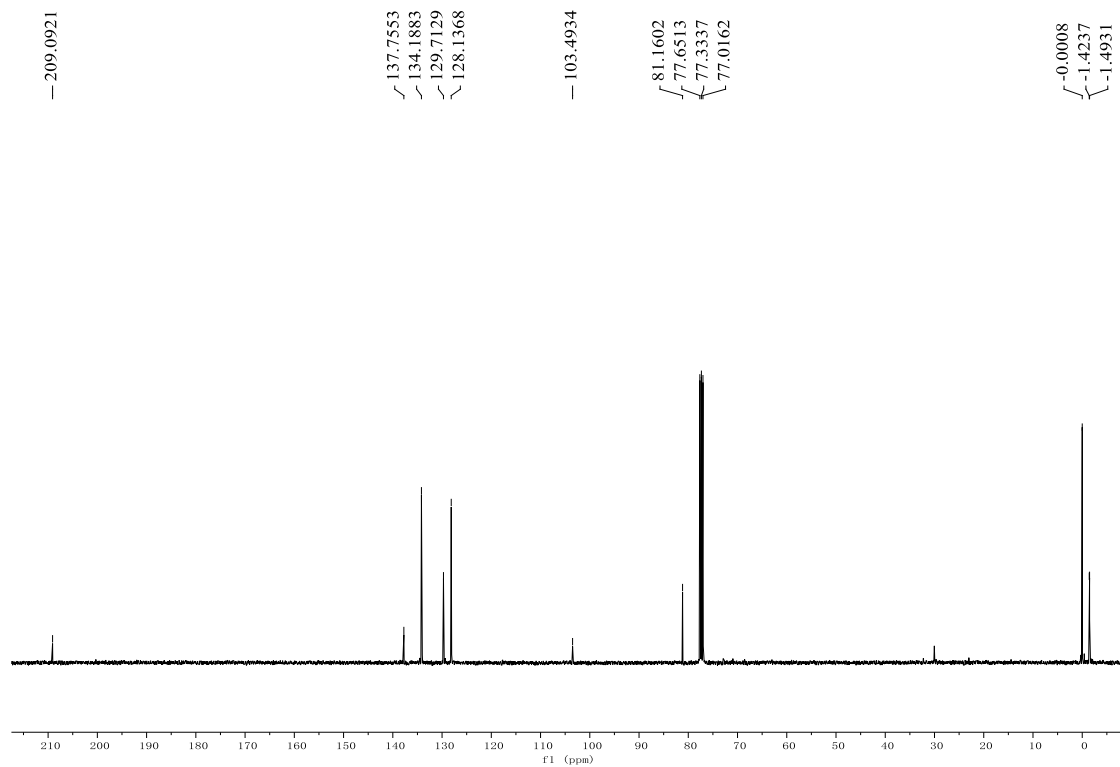

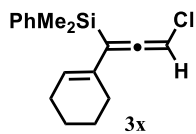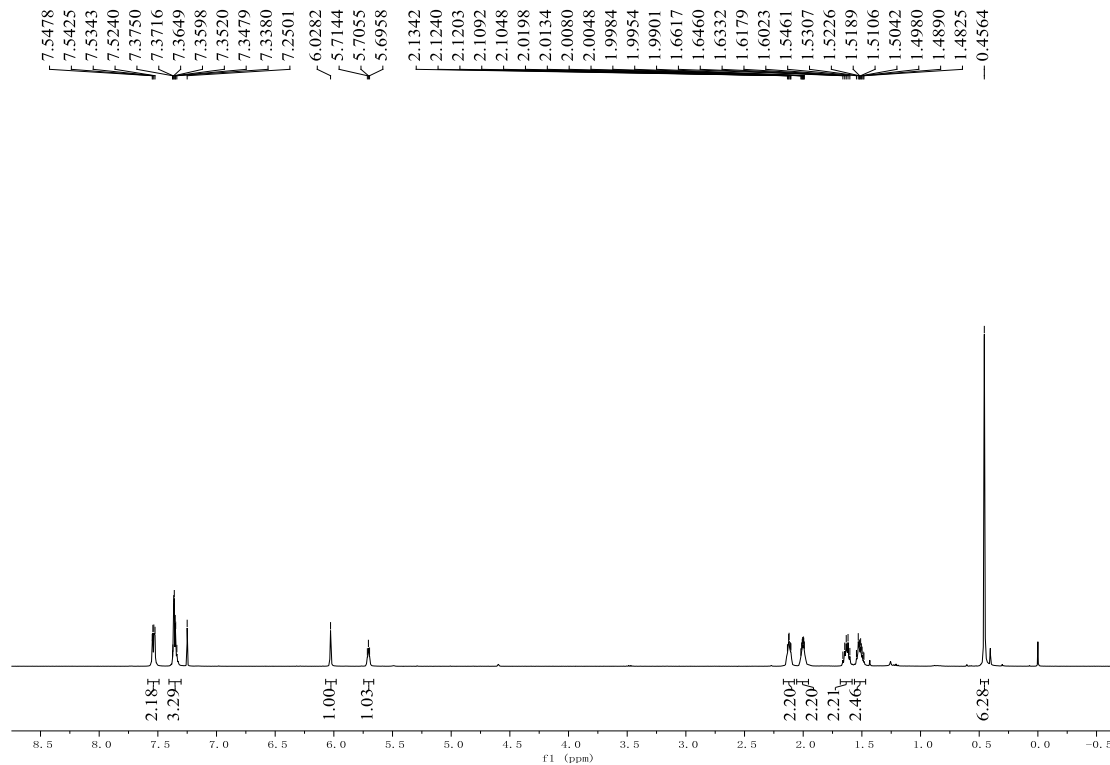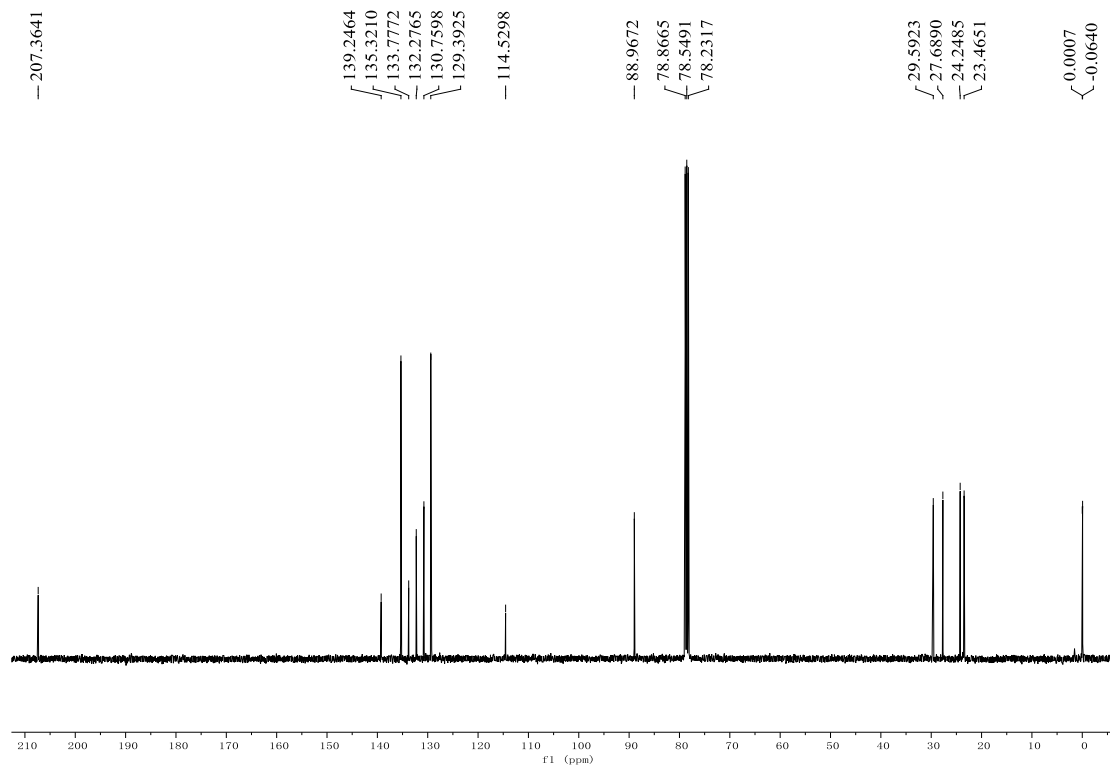



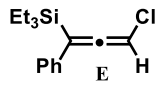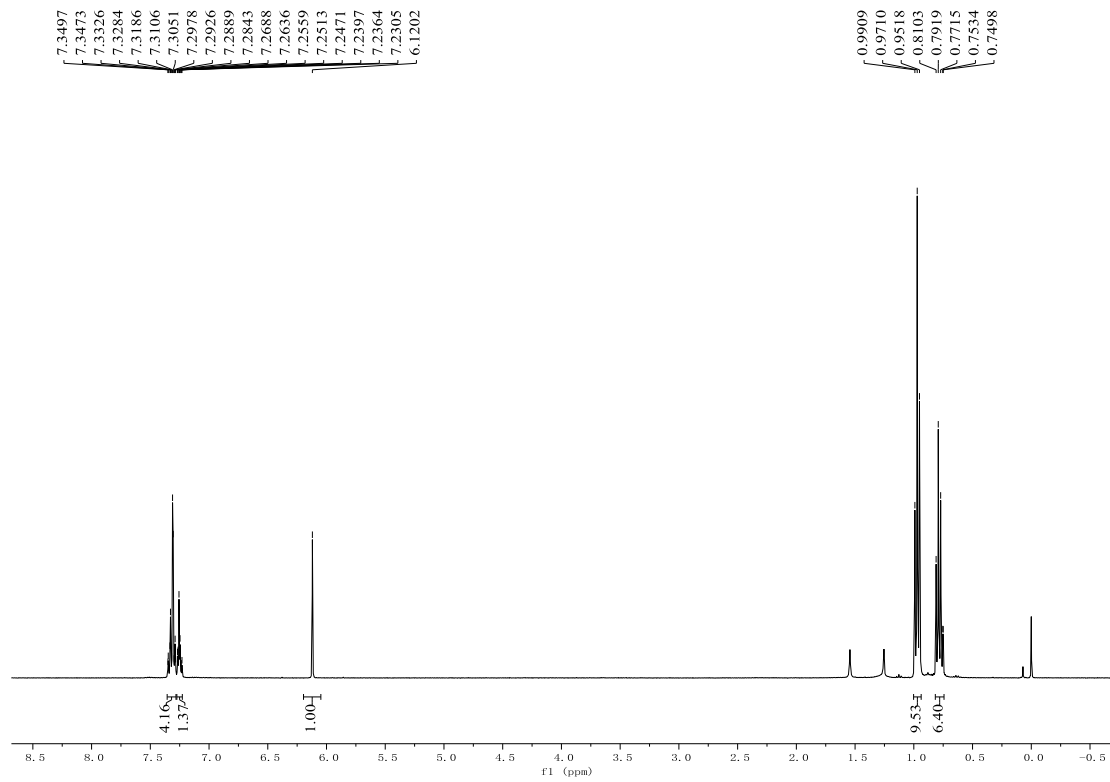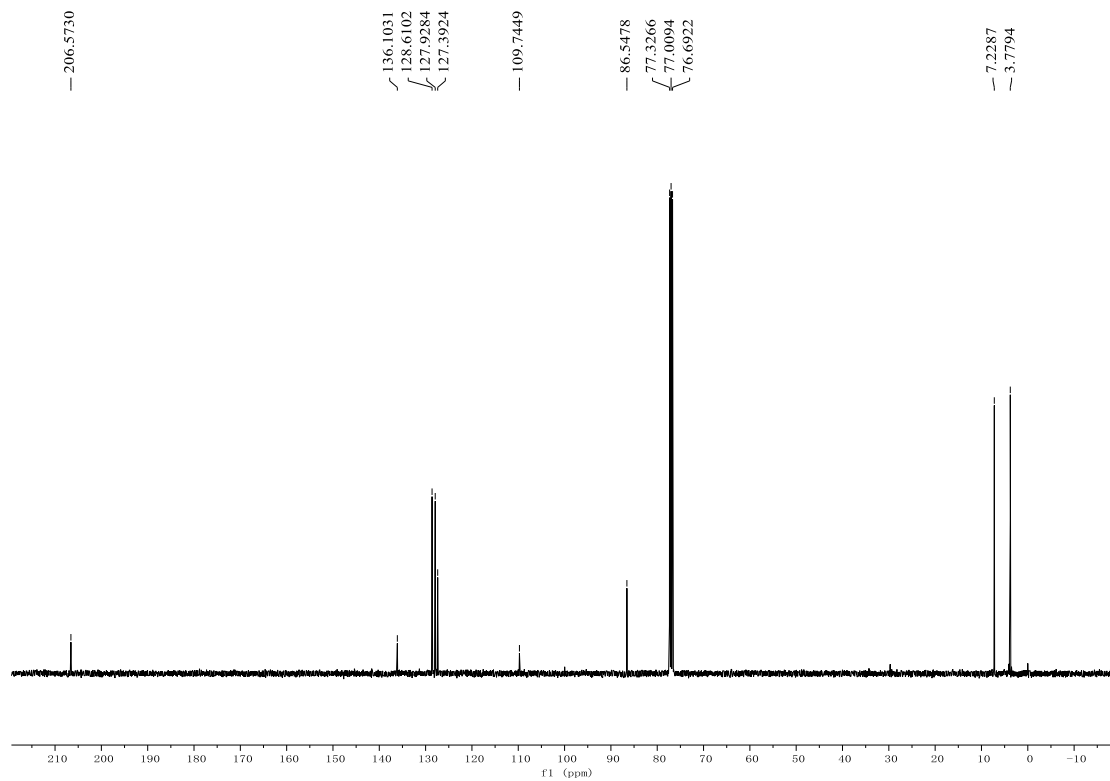

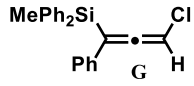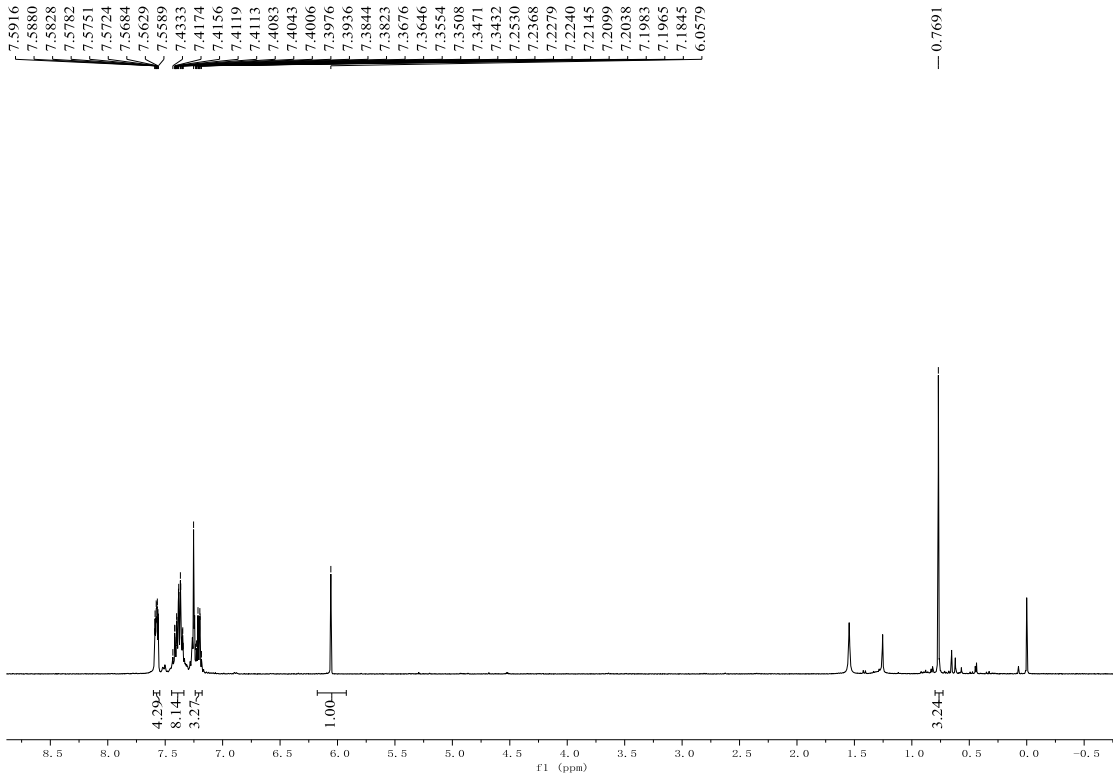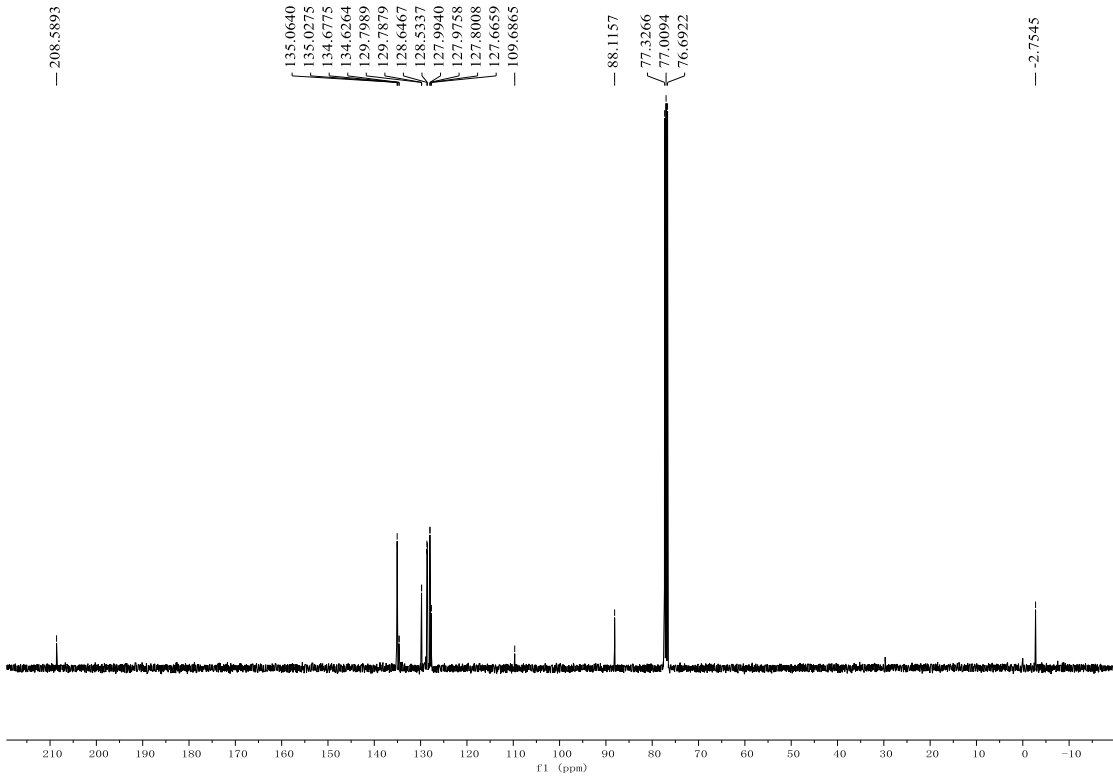

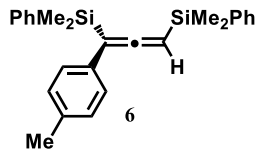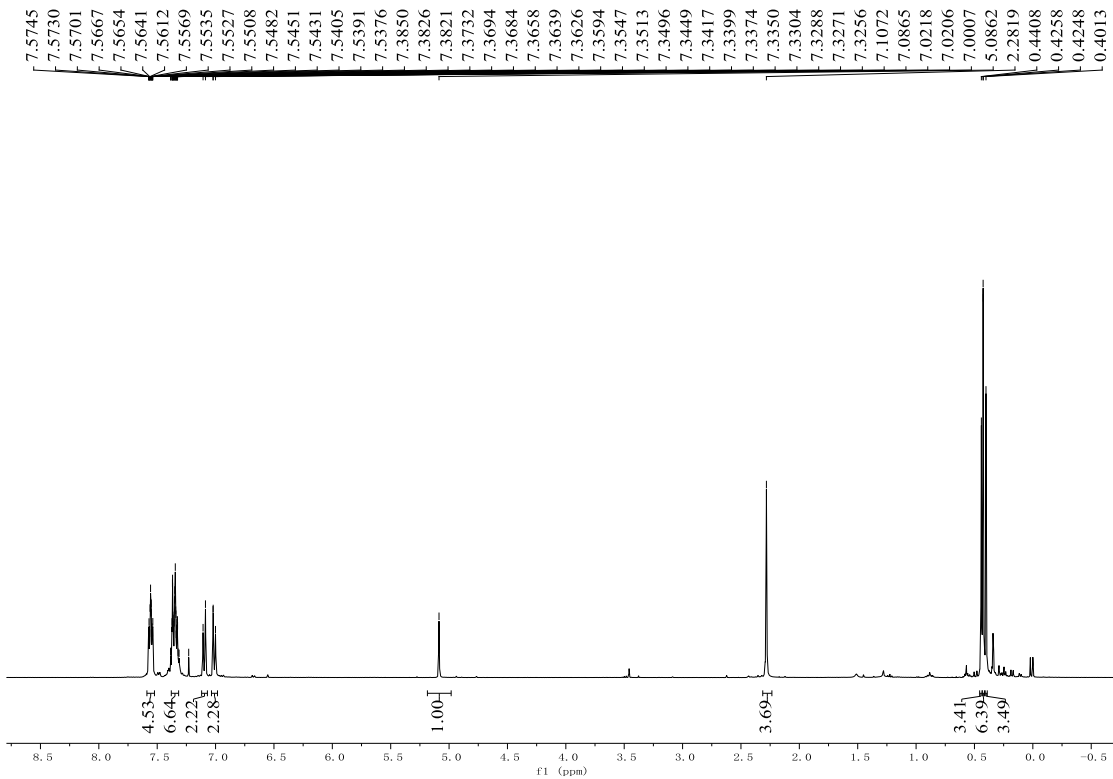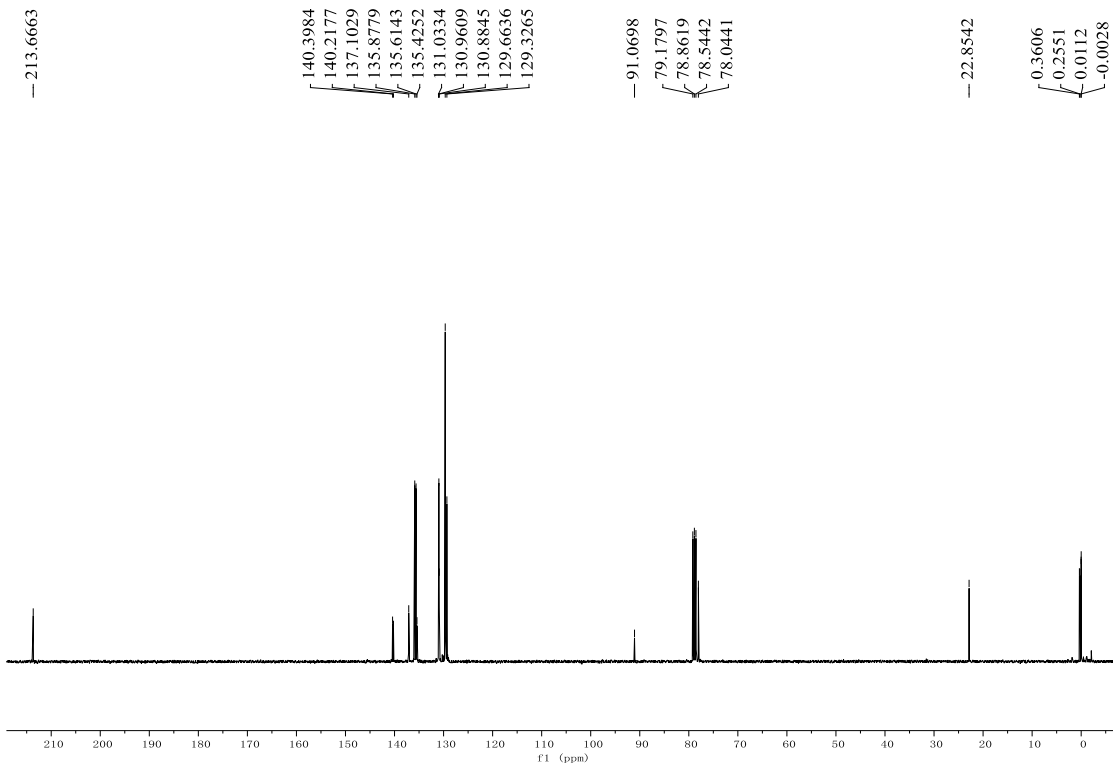

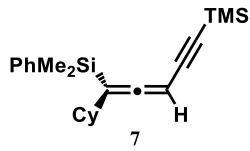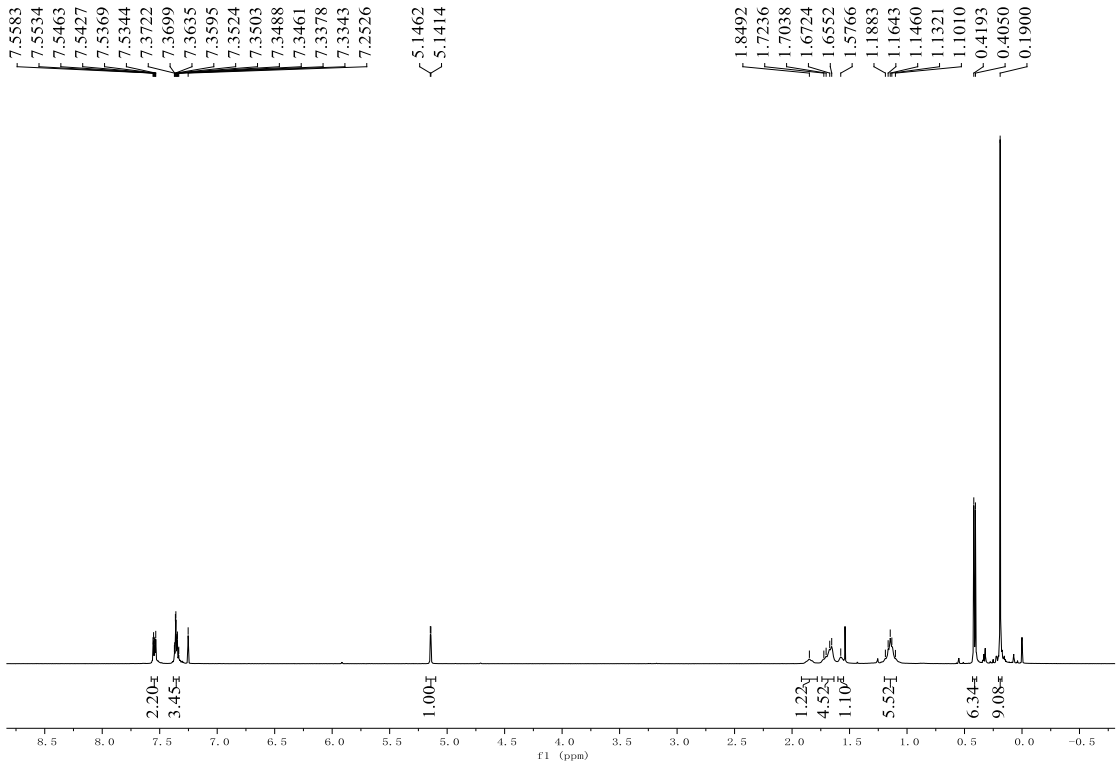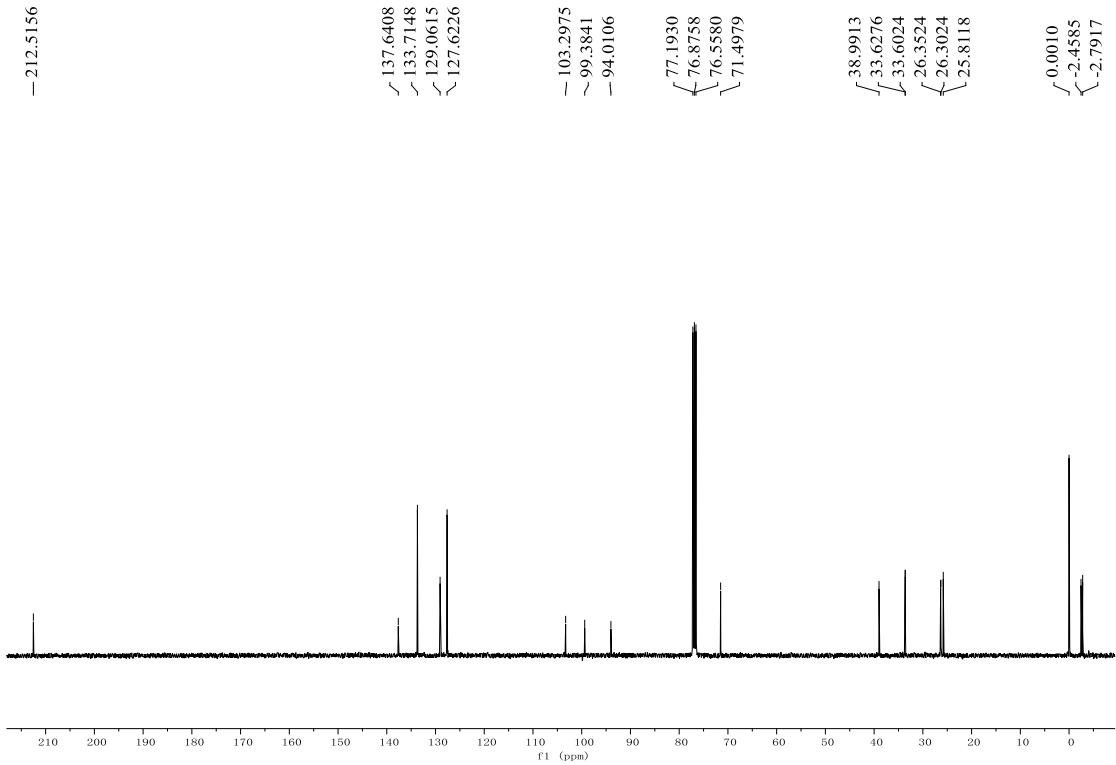

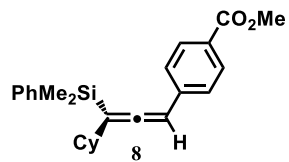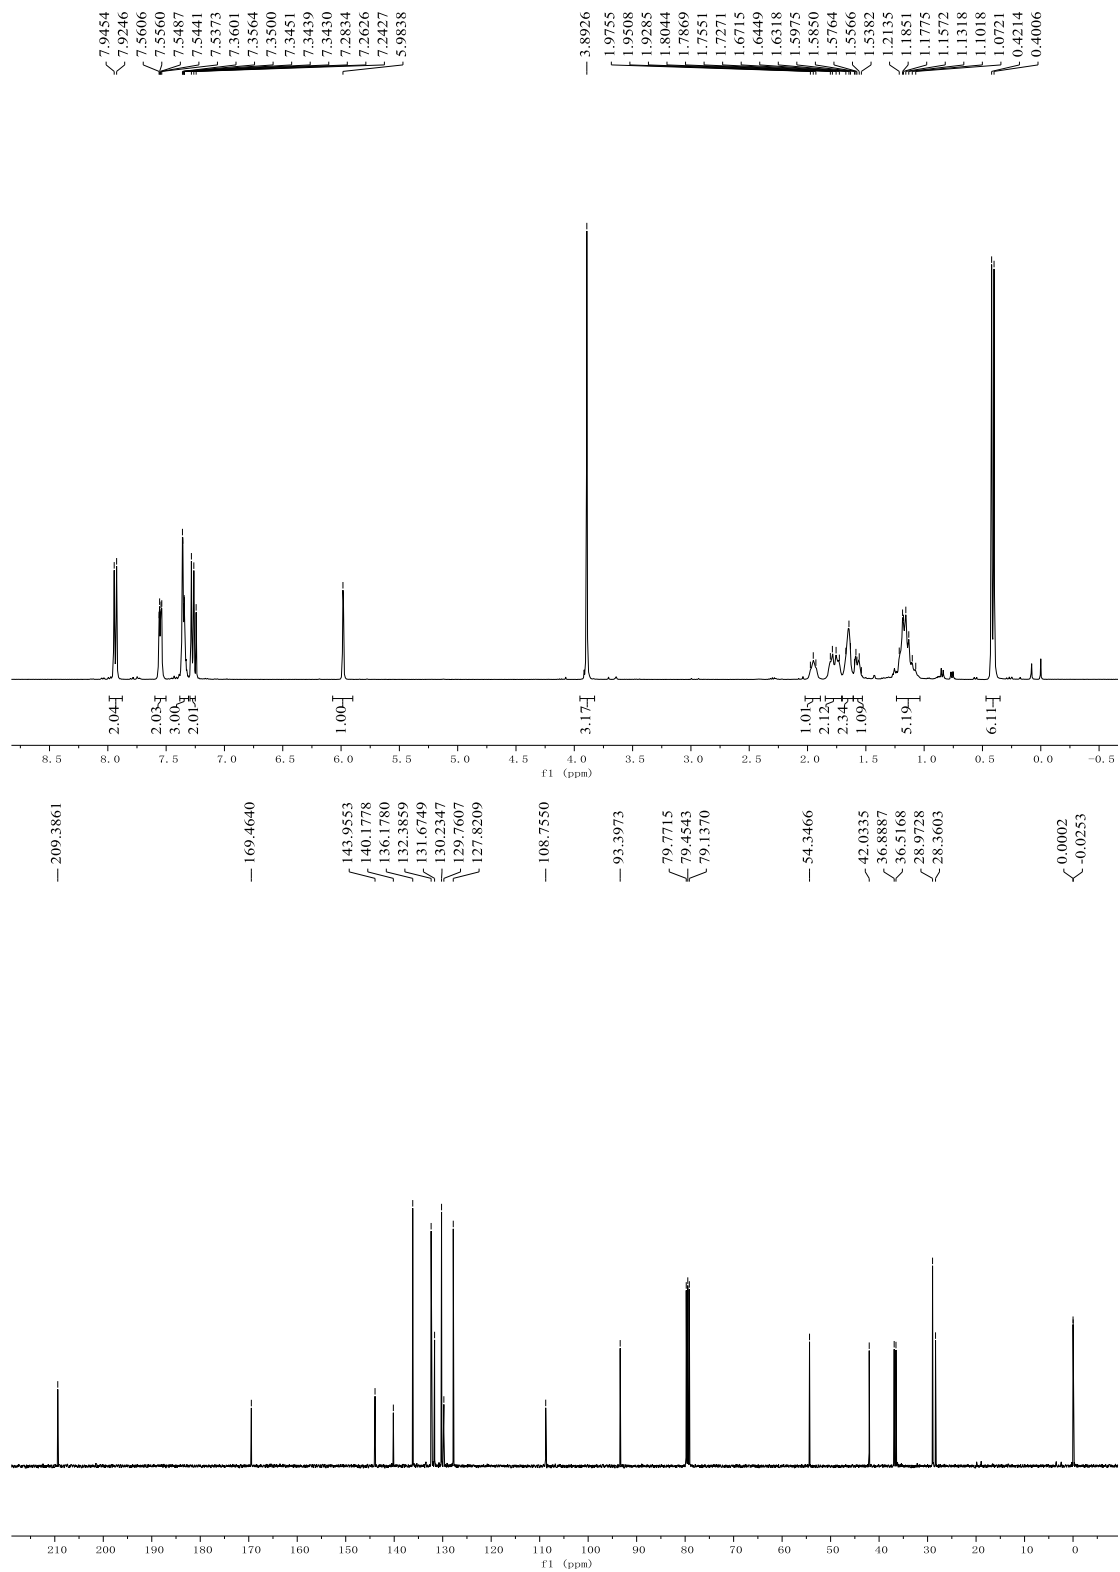



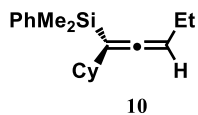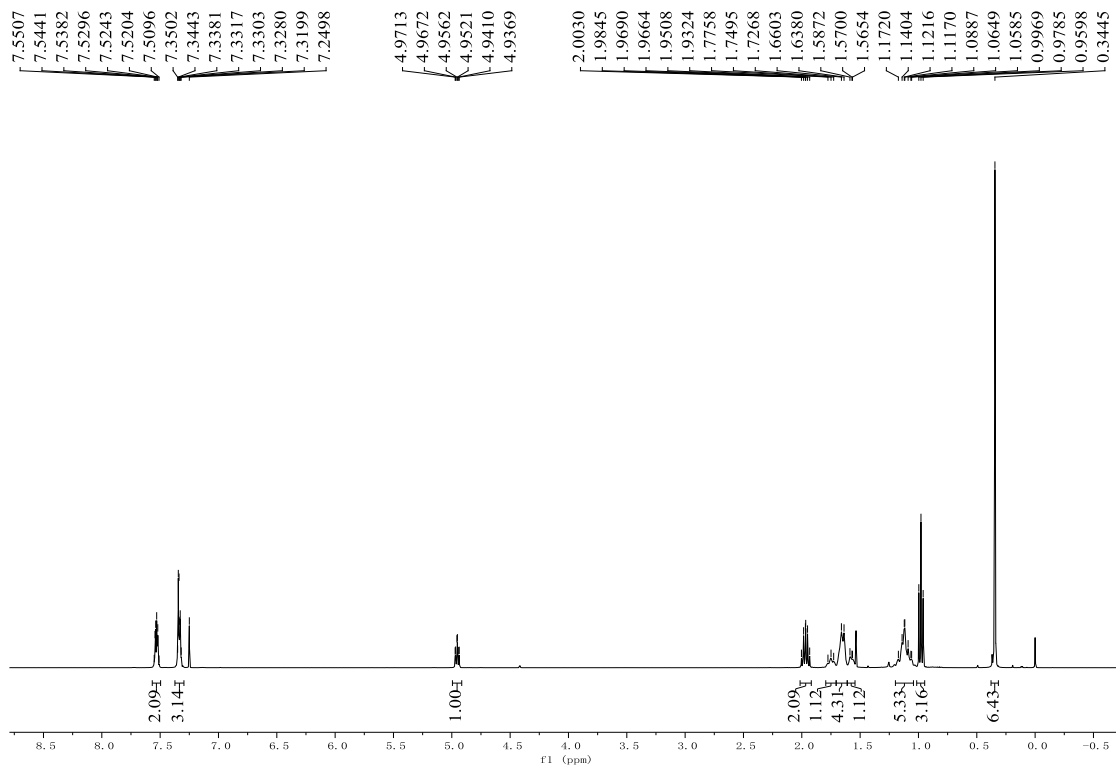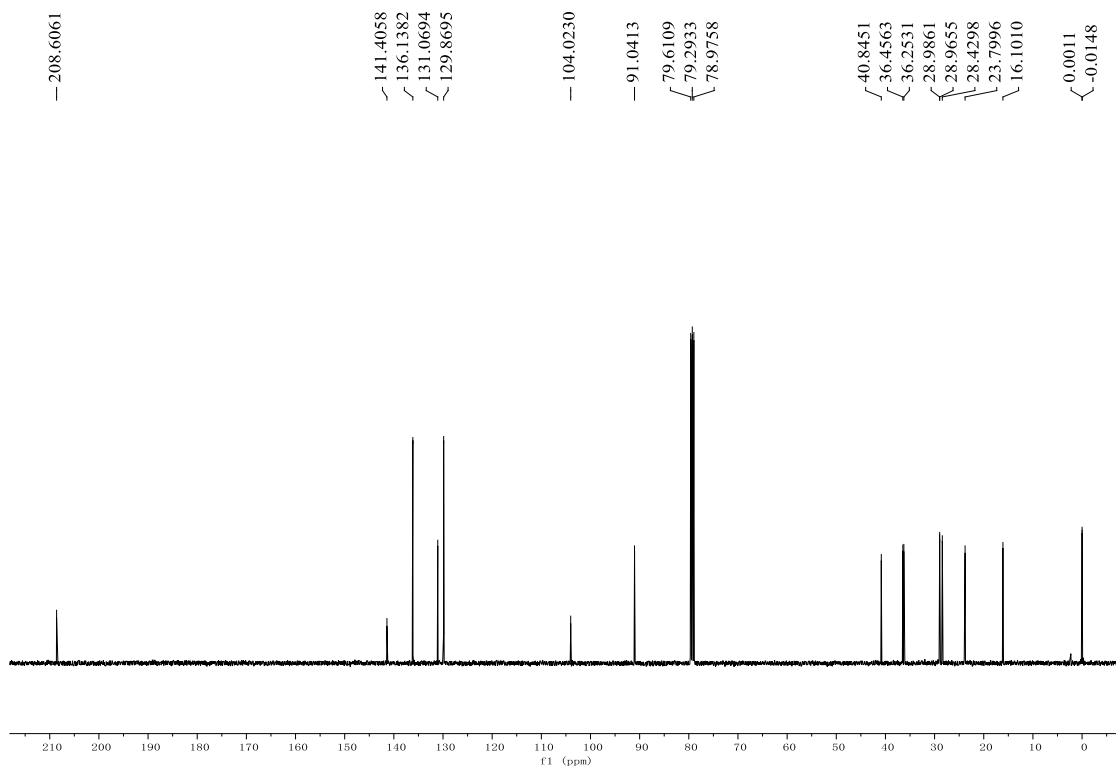

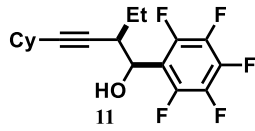

- 7.2629

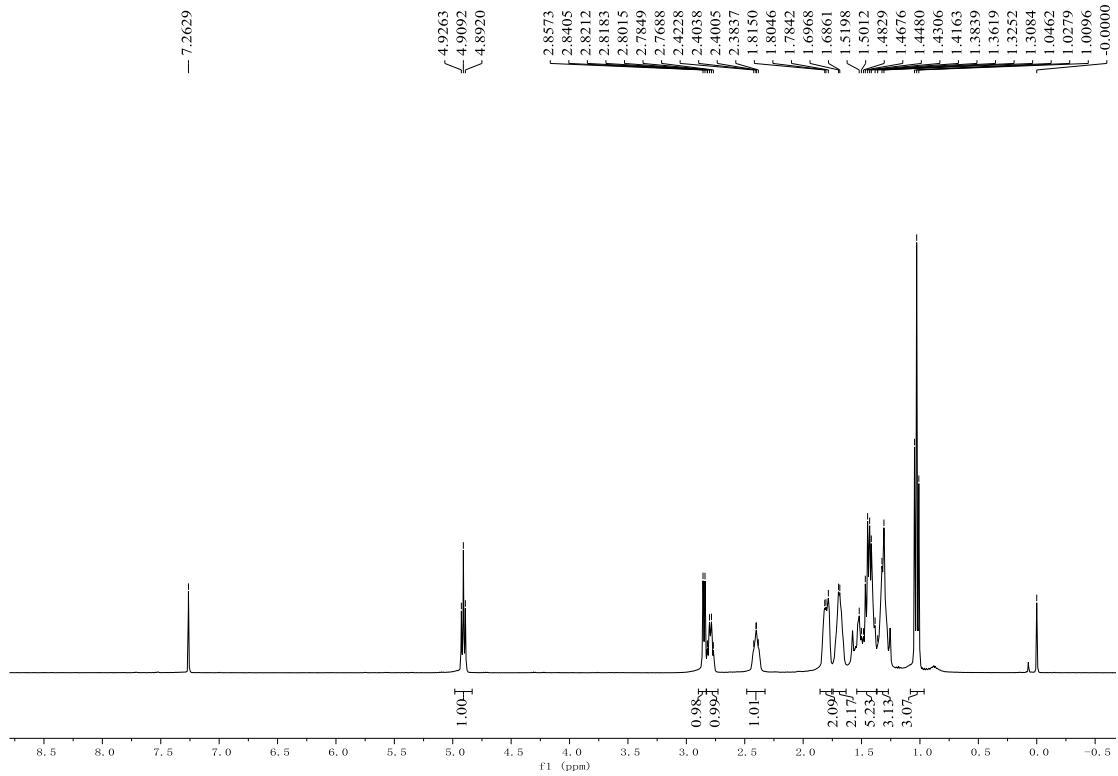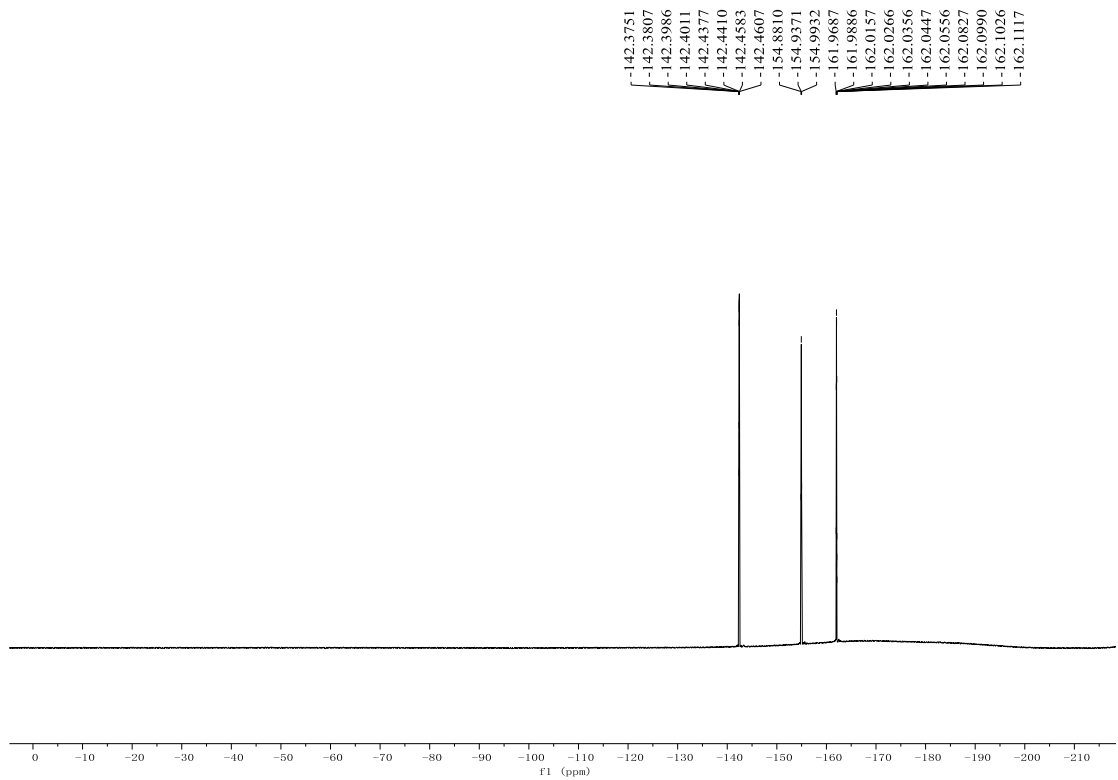



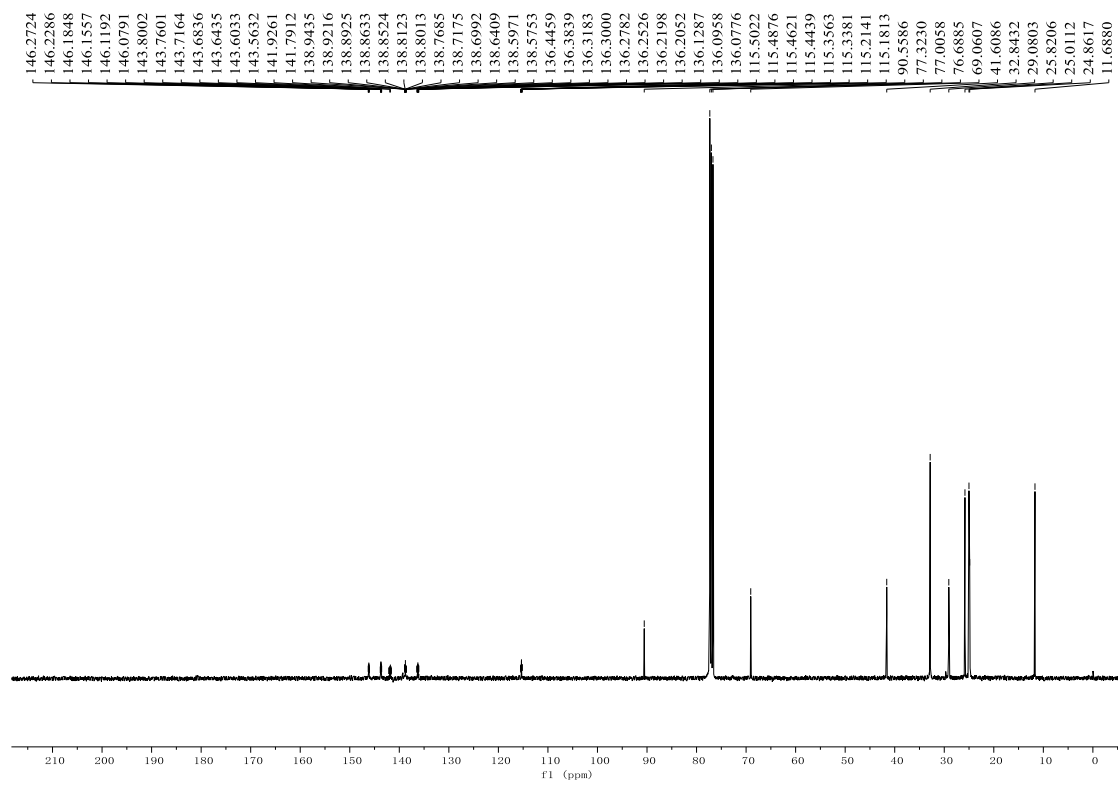

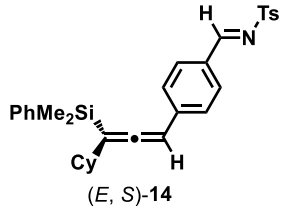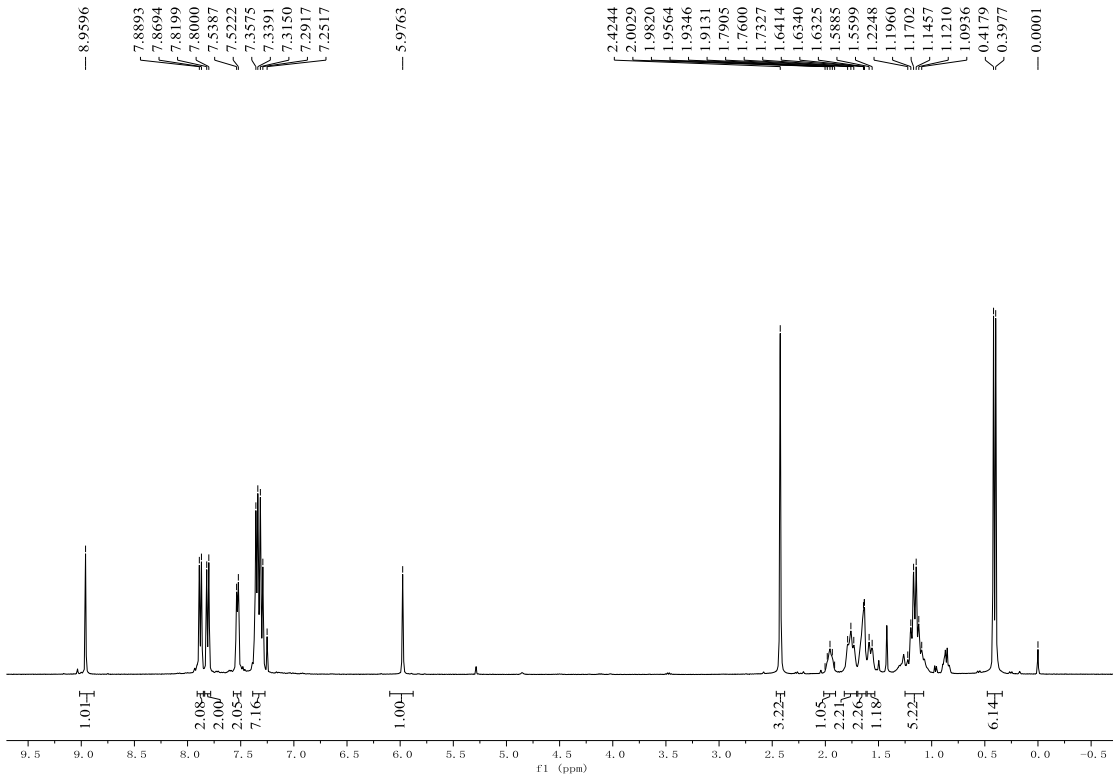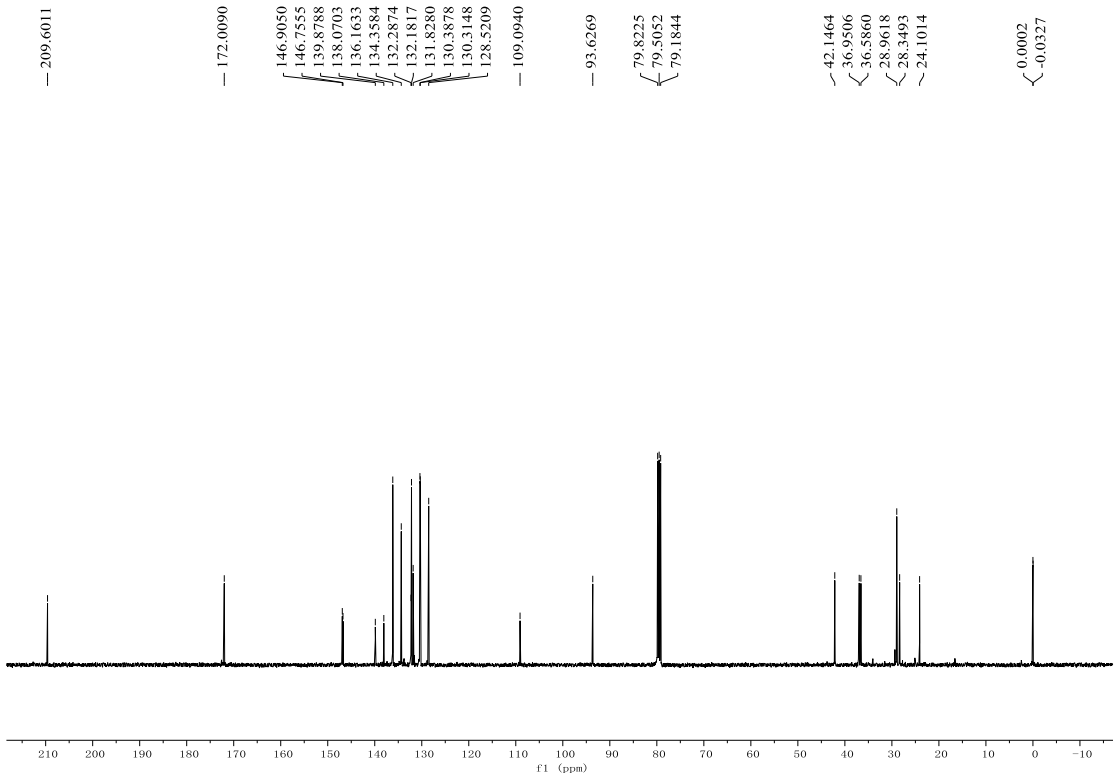

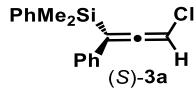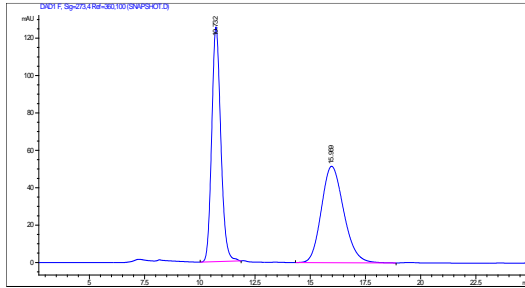

Signal 6: DAD1 F, Sig=273,4 Ref=360,100

| Peak # | RetTime [min] | Type | Width [min] | Area [mAU*s] | Height [mAU] | Area %  |
|--------|---------------|------|-------------|--------------|--------------|---------|
| 1      | 10.732        | BB   | 0.4399      | 3591.40381   | 125.50317    | 49.7873 |
| 2      | 15.969        | BB   | 1.0798      | 3622.09546   | 51.54496     | 50.2127 |

Totals : 7213.49927 177.04812

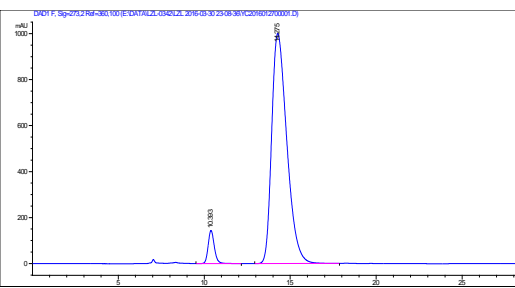

Signal 6: DAD1 F, Sig=273,2 Ref=360,100

| Peak # | RetTime [min] | Type | Width [min] | Area [mAU*s] | Height [mAU] | Area %  |
|--------|---------------|------|-------------|--------------|--------------|---------|
| 1      | 10.393        | BB   | 0.3862      | 3578.50073   | 143.85506    | 5.5179  |
| 2      | 14.275        | BB   | 0.9323      | 6.12742e4    | 1000.72412   | 94.4821 |

Totals : 6.48527e4 1144.57918

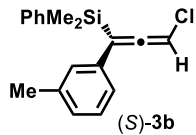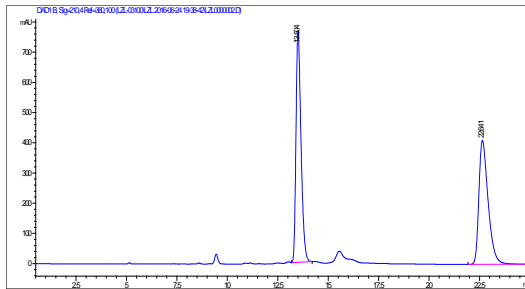

Signal 2: DAD1 B, Sig=210,4 Ref=360,100

| Peak # | RetTime [min] | Type | Width [min] | Area [mAU*s] | Height [mAU] | Area %  |
|--------|---------------|------|-------------|--------------|--------------|---------|
| 1      | 13.504        | VB   | 0.2639      | 1.32739e4    | 766.93518    | 50.4324 |
| 2      | 22.641        | BBA  | 0.4808      | 1.30463e4    | 410.49673    | 49.5676 |

Totals : 2.63202e4 1177.43192

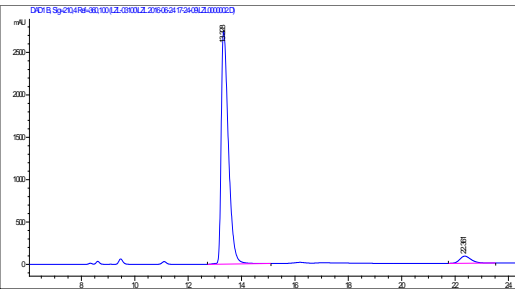

Signal 2: DAD1 B, Sig=210,4 Ref=360,100

| Peak # | RetTime [min] | Type | Width [min] | Area [mAU*s] | Height [mAU] | Area %  |
|--------|---------------|------|-------------|--------------|--------------|---------|
| 1      | 13.328        | MM   | 0.3258      | 5.41048e4    | 2767.78076   | 95.6240 |
| 2      | 22.361        | MM   | 0.4820      | 2476.00220   | 85.62308     | 4.3760  |

Totals : 5.65808e4 2853.40384

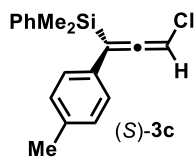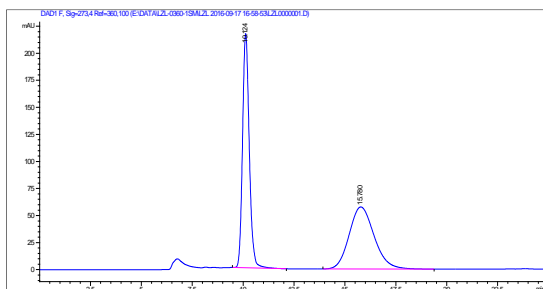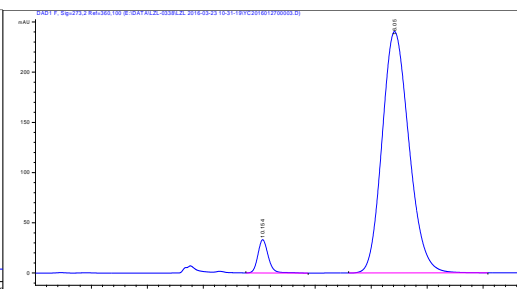

Signal 6: DAD1 F, Sig=273,4 Ref=360,100

Signal 6: DAD1 F, Sig=273,2 Ref=360,100

| Peak # | RetTime [min] | Type | Width [min] | Area [mAU*s] | Height [mAU] | Area %  | Peak # | RetTime [min] | Type | Width [min] | Area [mAU*s] | Height [mAU] | Area %  |
|--------|---------------|------|-------------|--------------|--------------|---------|--------|---------------|------|-------------|--------------|--------------|---------|
| 1      | 10.124        | BB   | 0.3544      | 4979.08789   | 216.41650    | 50.4753 | 1      | 10.154        | BB   | 0.4824      | 1061.86340   | 33.08468     | 5.0306  |
| 2      | 15.780        | BB   | 1.2984      | 4885.31738   | 57.31890     | 49.5247 | 2      | 16.053        | BB   | 1.0671      | 2.00462e4    | 240.33324    | 94.9694 |

Totals : 9864.40527 273.73540

Totals : 2.11081e4 273.41792

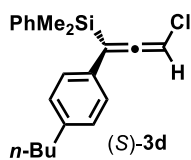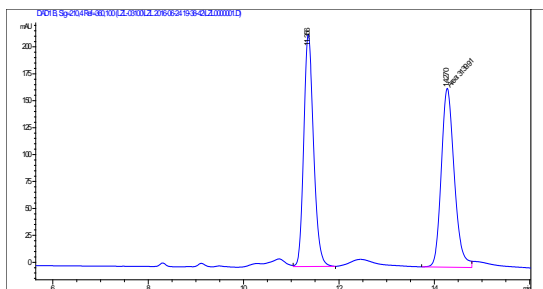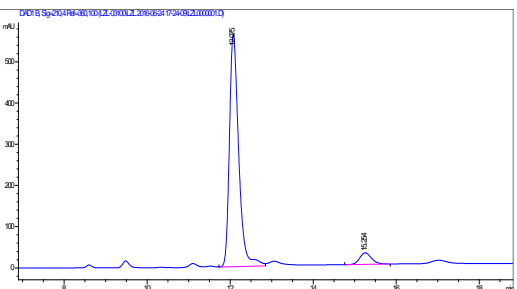

Signal 2: DAD1 B, Sig=210,4 Ref=360,100

Signal 2: DAD1 B, Sig=210,4 Ref=360,100

| Peak # | RetTime [min] | Type | Width [min] | Area [mAU*s] | Height [mAU] | Area %  | Peak # | RetTime [min] | Type | Width [min] | Area [mAU*s] | Height [mAU] | Area %  |
|--------|---------------|------|-------------|--------------|--------------|---------|--------|---------------|------|-------------|--------------|--------------|---------|
| 1      | 11.356        | VB   | 0.2189      | 3086.63818   | 215.75822    | 49.5722 | 1      | 12.075        | BV   | 0.2349      | 8745.37695   | 563.86841    | 94.0550 |
| 2      | 14.270        | MF   | 0.3151      | 3139.91113   | 166.08830    | 50.4278 | 2      | 15.254        | BB   | 0.3042      | 552.77844    | 28.01121     | 5.9450  |

Totals : 6226.54932 381.84653

Totals : 9298.15540 591.87962

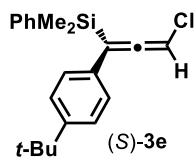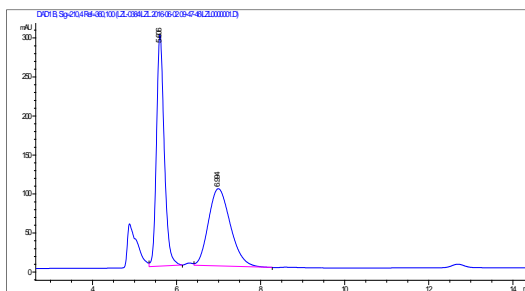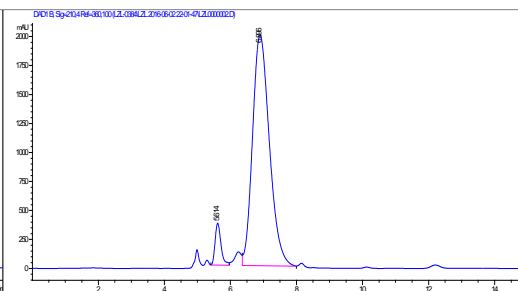

Signal 2: DAD1 B, Sig=210,4 Ref=360,100

Signal 2: DAD1 B, Sig=210,4 Ref=360,100

| Peak # | RetTime [min] | Type | Width [min] | Area [mAU*s] | Height [mAU] | Area %  | Peak # | RetTime [min] | Type | Width [min] | Area [mAU*s] | Height [mAU] | Area %  |
|--------|---------------|------|-------------|--------------|--------------|---------|--------|---------------|------|-------------|--------------|--------------|---------|
| 1      | 5.606         | VB   | 0.1941      | 3813.20703   | 296.42584    | 51.4836 | 1      | 5.614         | BV   | 0.1903      | 4482.46338   | 362.29968    | 5.9778  |
| 2      | 6.994         | VB   | 0.5650      | 3593.44165   | 99.11376     | 48.5164 | 2      | 6.896         | VB   | 0.5493      | 7.05032e4    | 1990.26440   | 94.0222 |

Totals : 7406.64868 395.53960

Totals : 7.49856e4 2352.56409

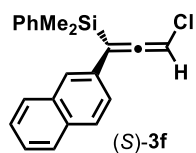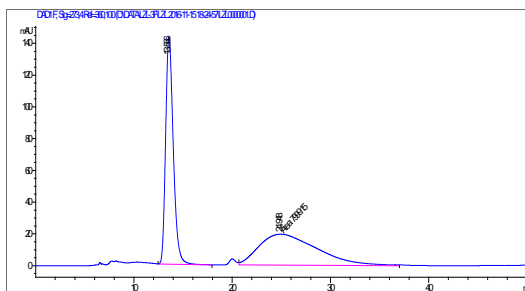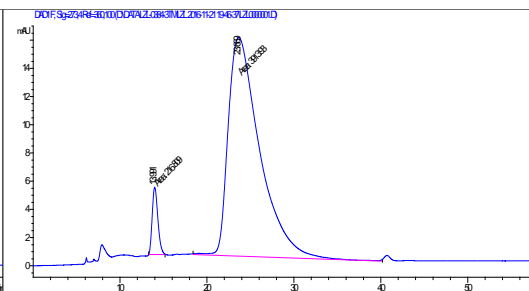

Signal 6: DAD1 F, Sig=273,4 Ref=360,100

Signal 6: DAD1 F, Sig=273,4 Ref=360,100

| Peak # | RetTime [min] | Type | Width [min] | Area [mAU*s] | Height [mAU] | Area %  | Peak # | RetTime [min] | Type | Width [min] | Area [mAU*s] | Height [mAU] | Area %  |
|--------|---------------|------|-------------|--------------|--------------|---------|--------|---------------|------|-------------|--------------|--------------|---------|
| 1      | 13.566        | BB   | 0.8334      | 7751.22900   | 142.77934    | 49.2130 | 1      | 13.991        | MM   | 0.7562      | 216.80930    | 4.77854      | 5.2487  |
| 2      | 24.948        | FM   | 6.8567      | 7999.15332   | 19.44358     | 50.7870 | 2      | 23.669        | MF   | 4.2004      | 3913.93481   | 15.53017     | 94.7513 |

Totals : 1.57504e4 162.22292

Totals : 4130.74411 20.30871

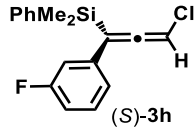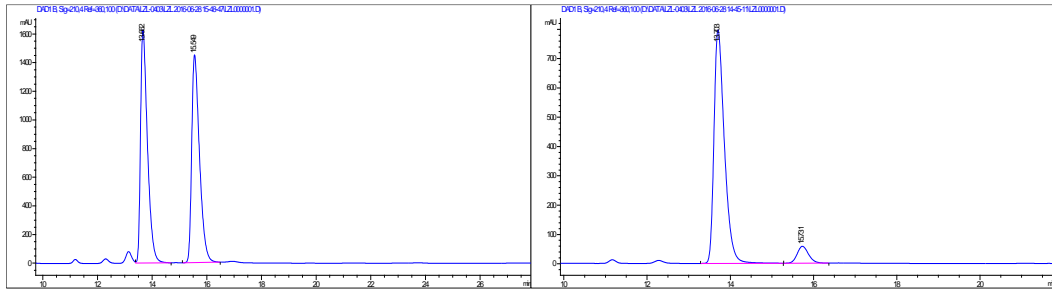

Signal 2: DAD1 B, Sig=210,4 Ref=360,100

Signal 2: DAD1 B, Sig=210,4 Ref=360,100

| Peak # | RetTime [min] | Type | Width [min] | Area [mAU*s] | Height [mAU] | Area %  | Peak # | RetTime [min] | Type | Width [min] | Area [mAU*s] | Height [mAU] | Area %  |
|--------|---------------|------|-------------|--------------|--------------|---------|--------|---------------|------|-------------|--------------|--------------|---------|
| 1      | 13.662        | VB   | 0.2653      | 2.86453e4    | 1628.08557   | 50.0092 | 1      | 13.703        | BB   | 0.2648      | 1.38577e4    | 797.02148    | 92.6725 |
| 2      | 15.549        | BB   | 0.2983      | 2.86348e4    | 1450.60510   | 49.9908 | 2      | 15.731        | BB   | 0.2935      | 1095.70715   | 57.70712     | 7.3275  |

Totals : 5.72801e4 3078.69067

Totals : 1.49534e4 854.72861

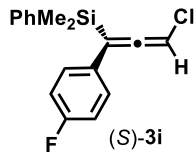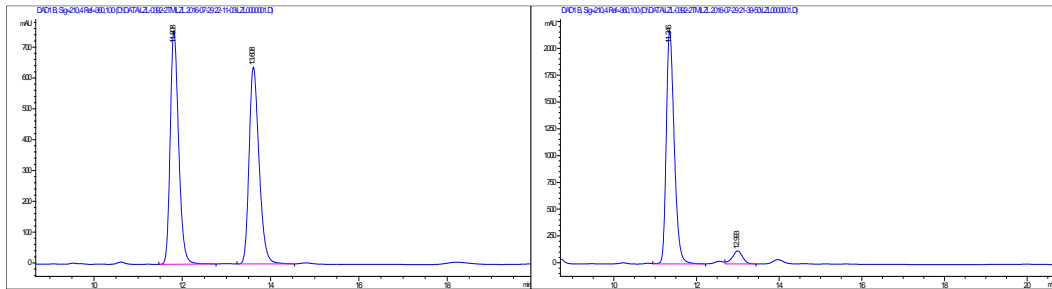

Signal 2: DAD1 B, Sig=210,4 Ref=360,100

Signal 2: DAD1 B, Sig=210,4 Ref=360,100

| Peak # | RetTime [min] | Type | Width [min] | Area [mAU*s] | Height [mAU] | Area %  | Peak # | RetTime [min] | Type | Width [min] | Area [mAU*s] | Height [mAU] | Area %  |
|--------|---------------|------|-------------|--------------|--------------|---------|--------|---------------|------|-------------|--------------|--------------|---------|
| 1      | 11.808        | BB   | 0.2043      | 1.00042e4    | 756.65826    | 50.0224 | 1      | 11.346        | VB   | 0.2062      | 2.90800e4    | 2171.68506   | 93.3462 |
| 2      | 13.608        | BB   | 0.2406      | 9995.26074   | 638.74432    | 49.9776 | 2      | 12.993        | VB   | 0.2602      | 2072.83862   | 120.78619    | 6.6538  |

Totals : 1.99995e4 1395.40259

Totals : 3.11529e4 2292.47125

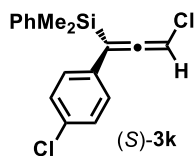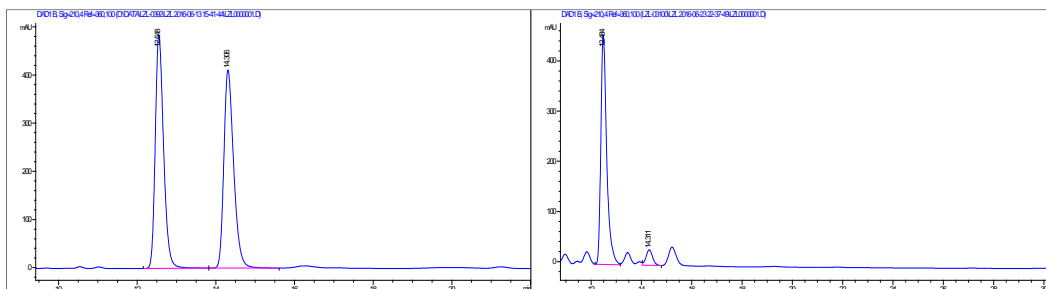

Signal 2: DAD1 B, Sig=210,4 Ref=360,100

Signal 2: DAD1 B, Sig=210,4 Ref=360,100

| Peak # | RetTime [min] | Type | Width [min] | Area [mAU*s] | Height [mAU] | Area %  | Peak # | RetTime [min] | Type | Width [min] | Area [mAU*s] | Height [mAU] | Area %  |
|--------|---------------|------|-------------|--------------|--------------|---------|--------|---------------|------|-------------|--------------|--------------|---------|
| 1      | 12.548        | BB   | 0.2258      | 7142.16895   | 484.89758    | 50.0441 | 1      | 12.484        | BV   | 0.2433      | 7428.21875   | 457.80365    | 92.9746 |
| 2      | 14.306        | BB   | 0.2641      | 7129.57031   | 411.59836    | 49.9559 | 2      | 14.311        | VB   | 0.2794      | 561.29901    | 30.97358     | 7.0254  |

Totals : 1.42717e4 896.49594

Totals : 7989.51776 488.77723

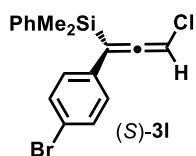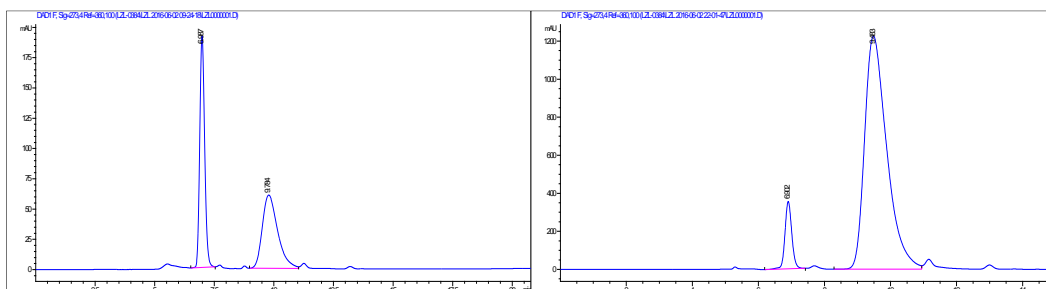

Signal 6: DAD1 F, Sig=273,4 Ref=360,100

Signal 6: DAD1 F, Sig=273,4 Ref=360,100

| Peak # | RetTime [min] | Type | Width [min] | Area [mAU*s] | Height [mAU] | Area %  | Peak # | RetTime [min] | Type | Width [min] | Area [mAU*s] | Height [mAU] | Area %  |
|--------|---------------|------|-------------|--------------|--------------|---------|--------|---------------|------|-------------|--------------|--------------|---------|
| 1      | 6.987         | BB   | 0.2199      | 2717.19019   | 191.09383    | 50.1123 | 1      | 6.902         | BB   | 0.2209      | 5075.59766   | 354.83728    | 8.1639  |
| 2      | 9.784         | BV   | 0.6854      | 2705.01660   | 60.52993     | 49.8877 | 2      | 9.483         | BV   | 0.6992      | 5.70957e4    | 1226.25073   | 91.8361 |

Totals : 5422.20679 251.62375

Totals : 6.21713e4 1581.08801

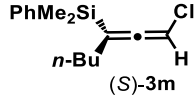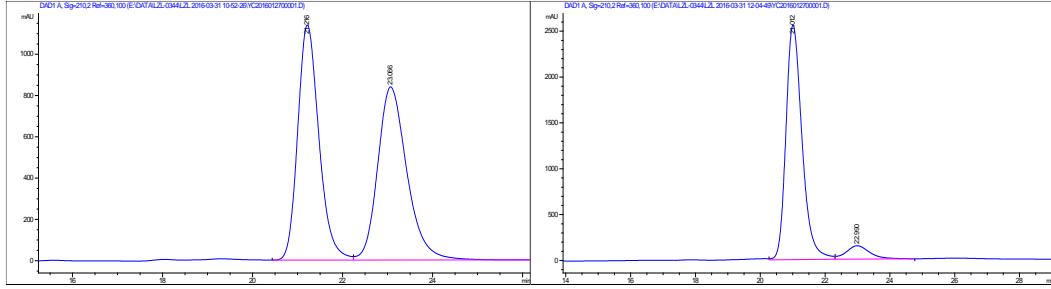

Signal 1: DAD1 A, Sig=210,2 Ref=360,100

| Peak # | RetTime [min] | Type | Width [min] | Area [mAU*s] | Height [mAU] | Area %  |
|--------|---------------|------|-------------|--------------|--------------|---------|
| 1      | 21.216        | BV   | 0.5166      | 3.73452e4    | 1138.87988   | 49.6501 |
| 2      | 23.066        | VBA  | 0.6844      | 3.78716e4    | 839.37390    | 50.3499 |

Totals : 7.52168e4 1978.25378

Signal 1: DAD1 A, Sig=210,2 Ref=360,100

| Peak # | RetTime [min] | Type | Width [min] | Area [mAU*s] | Height [mAU] | Area %  |
|--------|---------------|------|-------------|--------------|--------------|---------|
| 1      | 21.012        | VV   | 0.5188      | 8.82884e4    | 2557.44604   | 92.2333 |
| 2      | 22.990        | VB   | 0.7542      | 7434.56201   | 145.96889    | 7.7667  |

Totals : 9.57230e4 2703.41493

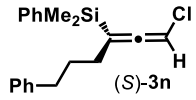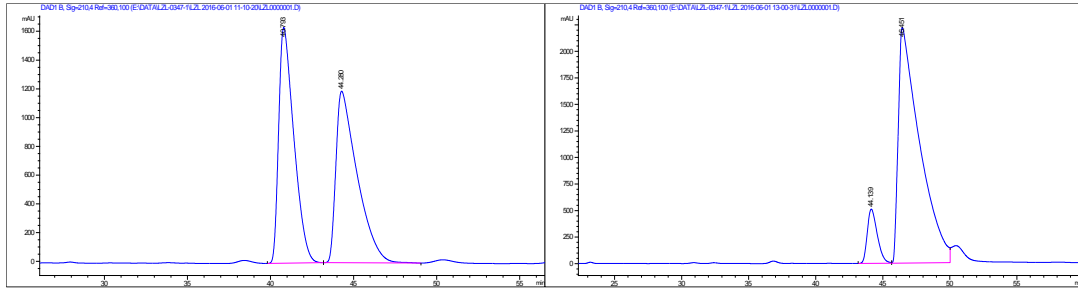

Signal 2: DAD1 B, Sig=210,4 Ref=360,100

| Peak # | RetTime [min] | Type | Width [min] | Area [mAU*s] | Height [mAU] | Area %  |
|--------|---------------|------|-------------|--------------|--------------|---------|
| 1      | 40.793        | BB   | 0.9402      | 1.03974e5    | 1638.86658   | 49.5261 |
| 2      | 44.280        | BB   | 1.2463      | 1.05964e5    | 1192.88843   | 50.4739 |

Totals : 2.09938e5 2831.75500

Signal 2: DAD1 B, Sig=210,4 Ref=360,100

| Peak # | RetTime [min] | Type | Width [min] | Area [mAU*s] | Height [mAU] | Area %  |
|--------|---------------|------|-------------|--------------|--------------|---------|
| 1      | 44.139        | BV   | 0.7887      | 2.64267e4    | 511.59106    | 9.7186  |
| 2      | 46.451        | VV   | 1.4307      | 2.45493e5    | 2219.03320   | 90.2814 |

Totals : 2.71919e5 2730.62427



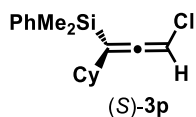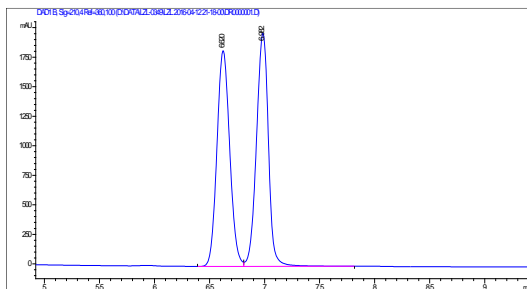

Signal 2: DAD1 B, Sig=210,4 Ref=360,100

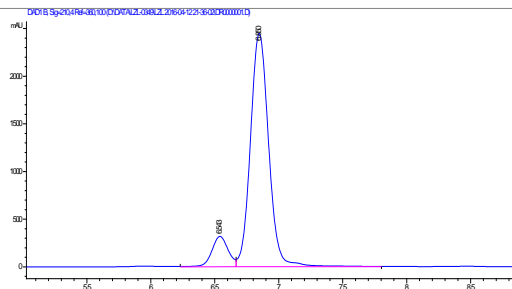

Signal 2: DAD1 B, Sig=210,4 Ref=360,100

| Peak # | RetTime [min] | Type | Width [min] | Area [mAU*s] | Height [mAU] | Area %  |
|--------|---------------|------|-------------|--------------|--------------|---------|
| 1      | 6.620         | BV   | 0.1261      | 1.47516e4    | 1828.96484   | 49.7436 |
| 2      | 6.982         | VB   | 0.1180      | 1.49036e4    | 1974.97961   | 50.2564 |

Totals : 2.96552e4 3803.94446

| Peak # | RetTime [min] | Type | Width [min] | Area [mAU*s] | Height [mAU] | Area %  |
|--------|---------------|------|-------------|--------------|--------------|---------|
| 1      | 6.543         | VV   | 0.1348      | 2813.73413   | 319.26279    | 10.3824 |
| 2      | 6.850         | VV   | 0.1537      | 2.42873e4    | 2449.73193   | 89.6176 |

Totals : 2.71010e4 2768.99472

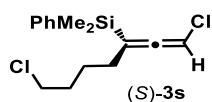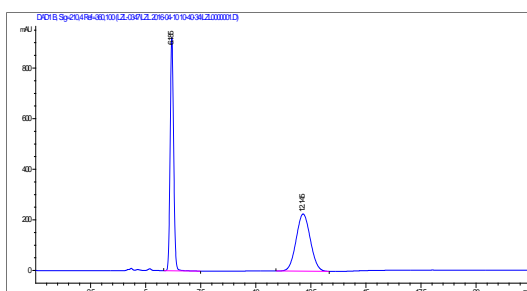

Signal 2: DAD1 B, Sig=210,4 Ref=360,100

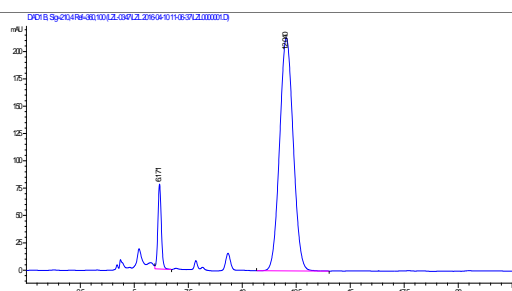

Signal 2: DAD1 B, Sig=210,4 Ref=360,100

| Peak # | RetTime [min] | Type | Width [min] | Area [mAU*s] | Height [mAU] | Area %  |
|--------|---------------|------|-------------|--------------|--------------|---------|
| 1      | 6.185         | BB   | 0.1720      | 1.01137e4    | 922.02484    | 50.0180 |
| 2      | 12.145        | BB   | 0.6997      | 1.01064e4    | 226.02942    | 49.9820 |

Totals : 2.02201e4 1148.05426

| Peak # | RetTime [min] | Type | Width [min] | Area [mAU*s] | Height [mAU] | Area %  |
|--------|---------------|------|-------------|--------------|--------------|---------|
| 1      | 6.171         | VB   | 0.1710      | 858.67053    | 77.63022     | 8.4166  |
| 2      | 12.040        | BB   | 0.6853      | 9343.46484   | 213.21170    | 91.5834 |

Totals : 1.02021e4 290.84192

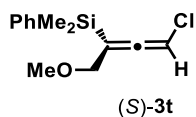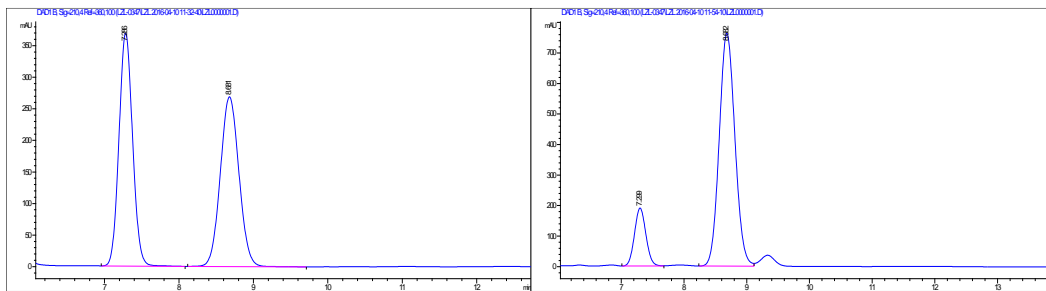

Signal 2: DAD1 B, Sig=210,4 Ref=360,100

Signal 2: DAD1 B, Sig=210,4 Ref=360,100

| Peak # | RetTime [min] | Type | Width [min] | Area [mAU*s] | Height [mAU] | Area %  | Peak # | RetTime [min] | Type | Width [min] | Area [mAU*s] | Height [mAU] | Area %  |
|--------|---------------|------|-------------|--------------|--------------|---------|--------|---------------|------|-------------|--------------|--------------|---------|
| 1      | 7.286         | BB   | 0.1981      | 4682.50098   | 368.83368    | 50.0304 | 1      | 7.299         | BV   | 0.1972      | 2395.32202   | 189.80386    | 15.2877 |
| 2      | 8.681         | BB   | 0.2708      | 4676.80371   | 268.99612    | 49.9696 | 2      | 8.682         | BV   | 0.2709      | 1.32730e4    | 763.28540    | 84.7123 |

Totals : 9359.30469 637.82980

Totals : 1.56683e4 953.08926

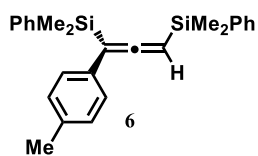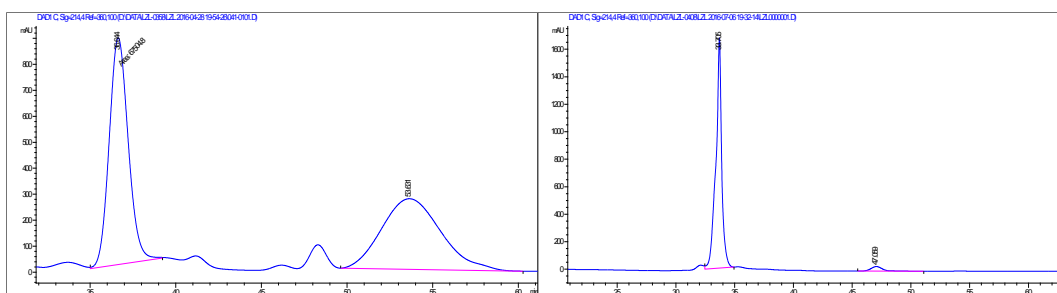

Signal 3: DAD1 C, Sig=214,4 Ref=360,100

Signal 3: DAD1 C, Sig=214,4 Ref=360,100

| Peak # | RetTime [min] | Type | Width [min] | Area [mAU*s] | Height [mAU] | Area %  | Peak # | RetTime [min] | Type | Width [min] | Area [mAU*s] | Height [mAU] | Area %  |
|--------|---------------|------|-------------|--------------|--------------|---------|--------|---------------|------|-------------|--------------|--------------|---------|
| 1      | 36.644        | MF   | 1.3214      | 7.04392e4    | 888.44092    | 51.9406 | 1      | 33.705        | VB   | 0.4654      | 5.76402e4    | 1675.46606   | 96.2515 |
| 2      | 53.631        | BB   | 3.4392      | 6.51756e4    | 271.83408    | 48.0594 | 2      | 47.059        | BB   | 1.0501      | 2244.77319   | 33.23087     | 3.7485  |

Totals : 1.35615e5 1160.27499

Totals : 5.98850e4 1708.69693

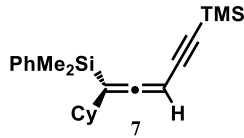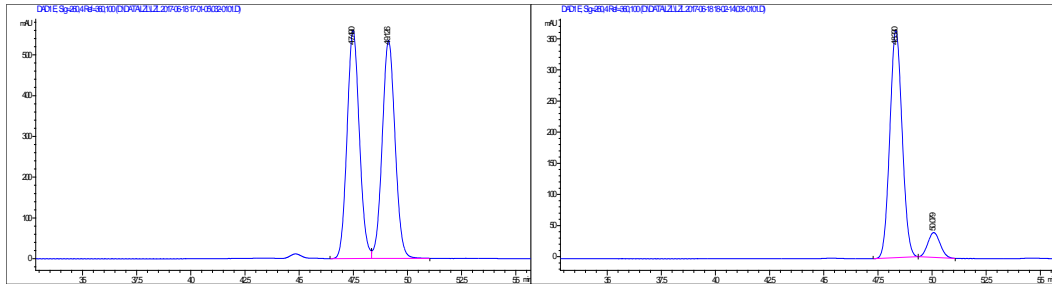

Signal 5: DAD1 E, Sig=260,4 Ref=360,100

Signal 5: DAD1 E, Sig=260,4 Ref=360,100

| Peak # | RetTime [min] | Type | Width [min] | Area [mAU*s] | Height [mAU] | Area %  |
|--------|---------------|------|-------------|--------------|--------------|---------|
| 1      | 47.490        | BV   | 0.6046      | 2.21081e4    | 559.93231    | 50.0481 |
| 2      | 49.126        | VB   | 0.5930      | 2.20656e4    | 535.21979    | 49.9519 |

| Peak # | RetTime [min] | Type | Width [min] | Area [mAU*s] | Height [mAU] | Area %  |
|--------|---------------|------|-------------|--------------|--------------|---------|
| 1      | 48.330        | BB   | 0.6058      | 1.43922e4    | 365.14581    | 90.1630 |
| 2      | 50.079        | BB   | 0.6060      | 1570.22803   | 39.82764     | 9.8370  |

Totals : 4.41737e4 1095.15210

Totals : 1.59625e4 404.97345

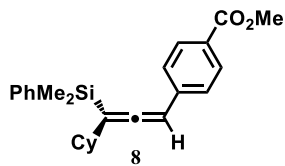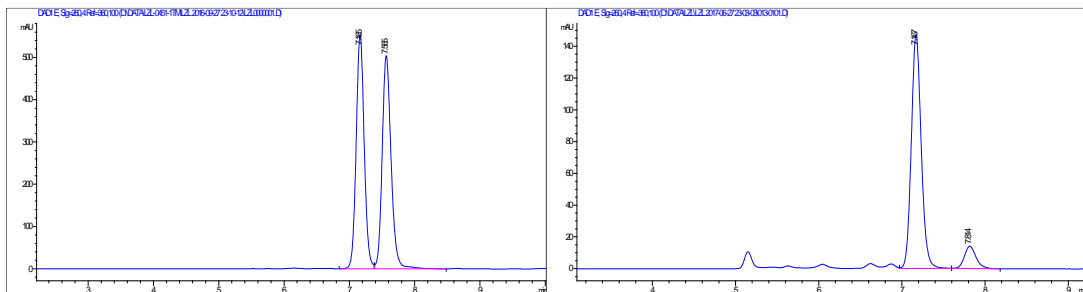

Signal 5: DAD1 E, Sig=260,4 Ref=360,100

Signal 4: DAD1 E, Sig=260,4 Ref=360,100

| Peak # | RetTime [min] | Type | Width [min] | Area [mAU*s] | Height [mAU] | Area %  |
|--------|---------------|------|-------------|--------------|--------------|---------|
| 1      | 7.165         | BV   | 0.1317      | 4733.23047   | 553.94714    | 49.6984 |
| 2      | 7.565         | VB   | 0.1448      | 4790.68701   | 504.41898    | 50.3016 |

| Peak # | RetTime [min] | Type | Width [min] | Area [mAU*s] | Height [mAU] | Area %  |
|--------|---------------|------|-------------|--------------|--------------|---------|
| 1      | 7.167         | VB   | 0.1285      | 1216.48901   | 147.12424    | 89.9513 |
| 2      | 7.814         | BB   | 0.1489      | 135.89771    | 14.04717     | 10.0487 |

Totals : 9523.91748 1058.36612

Totals : 1352.38672 161.17141



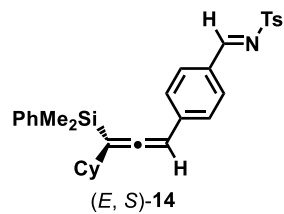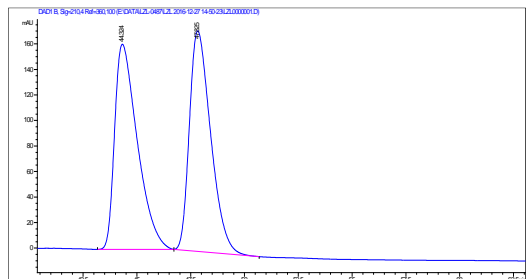

Signal 2: DAD1 B, Sig=210,4 Ref=360,100

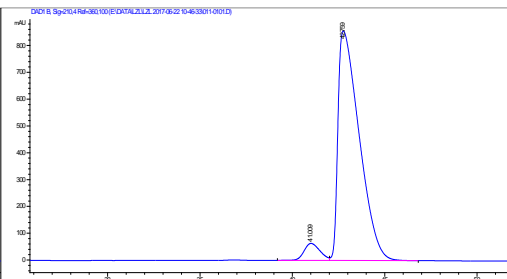

Signal 2: DAD1 B, Sig=210,4 Ref=360,100

| Peak #   | RetTime [min] | Type | Width [min] | Area [mAU*s] | Height [mAU] | Area %  | Peak #   | RetTime [min] | Type | Width [min] | Area [mAU*s] | Height [mAU] | Area %  |
|----------|---------------|------|-------------|--------------|--------------|---------|----------|---------------|------|-------------|--------------|--------------|---------|
| 1        | 44.324        | BB   | 1.1011      | 1.17833e4    | 160.76486    | 49.7724 | 1        | 41.009        | BV   | 0.9078      | 3784.01025   | 63.44725     | 5.2536  |
| 2        | 47.825        | BB   | 1.0527      | 1.18910e4    | 172.81844    | 50.2276 | 2        | 42.759        | VB   | 1.1437      | 6.82433e4    | 856.37207    | 94.7464 |
| Totals : |               |      |             | 2.36743e4    | 333.58330    |         | Totals : |               |      |             | 7.20273e4    | 919.81932    |         |

## 12 Crystal Data for (*E, S*)-14.

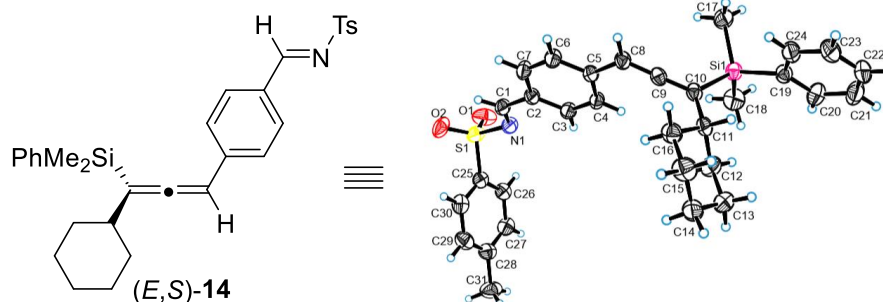

| <b>Table Crystal data and structure refinement for lzl-86.</b> |                                                               |
|----------------------------------------------------------------|---------------------------------------------------------------|
| Identification code                                            | lzl-86                                                        |
| Empirical formula                                              | C <sub>31</sub> H <sub>35</sub> NO <sub>2</sub> SSi           |
| Formula weight                                                 | 513.75                                                        |
| Temperature/K                                                  | 290(2)                                                        |
| Crystal system                                                 | monoclinic                                                    |
| Space group                                                    | C2                                                            |
| a/Å                                                            | 12.12950(10)                                                  |
| b/Å                                                            | 13.86570(10)                                                  |
| c/Å                                                            | 17.2627(2)                                                    |
| α / °                                                          | 90                                                            |
| β / °                                                          | 104.7730(10)                                                  |
| γ / °                                                          | 90                                                            |
| Volume/Å <sup>3</sup>                                          | 2807.34(5)                                                    |
| Z                                                              | 4                                                             |
| ρ <sub>calc</sub> /cm <sup>3</sup>                             | 1.216                                                         |
| μ /mm <sup>-1</sup>                                            | 1.643                                                         |
| F(000)                                                         | 1096.0                                                        |
| Crystal size/mm <sup>3</sup>                                   | 0.230 × 0.220 × 0.150                                         |
| Radiation                                                      | CuKα (λ = 1.54184)                                            |
| 2θ range for data collection/°                                 | 9.878 to 142.544                                              |
| Index ranges                                                   | -14 ≤ h ≤ 14, -16 ≤ k ≤ 16, -18 ≤ l ≤ 20                      |
| Reflections collected                                          | 10139                                                         |
| Independent reflections                                        | 5264 [R <sub>int</sub> = 0.0265, R <sub>sigma</sub> = 0.0328] |
| Data/restraints/parameters                                     | 5264/1/328                                                    |
| Goodness-of-fit on F <sup>2</sup>                              | 1.029                                                         |
| Final R indexes [I ≥ 2σ (I)]                                   | R <sub>1</sub> = 0.0350, wR <sub>2</sub> = 0.0938             |
| Final R indexes [all data]                                     | R <sub>1</sub> = 0.0362, wR <sub>2</sub> = 0.0955             |
| Largest diff. peak/hole / e Å <sup>-3</sup>                    | 0.28/-0.15                                                    |
| Flack parameter                                                | -0.011(11)                                                    |
